# Supplementary material
Source: PubMed Central journal article supplement (PMC6767916)
Supplement: NIHMS1051585-supplement-Supplemental.pdf [file NIHMS1051585-supplement-Supplemental.pdf]

# Supporting Information

## Three-Component Protein Modification Using Mercaptobenzaldehyde Derivatives

Yuanwei Dai, Jiaping Weng, Justin George, Huan Chen, Qishan Lin, Jun Wang, Maksim Royzen and Qiang Zhang\*

Department of Chemistry, University at Albany, State University of New York

1400 Washington Avenue, Albany, NY 12222 (USA)

E-mail: [qzhang5@albany.edu](mailto:qzhang5@albany.edu)

### Table of Contents

|                                                             |           |
|-------------------------------------------------------------|-----------|
| <b>1. General Information:</b> .....                        | <b>2</b>  |
| <b>2. General Procedures:</b> .....                         | <b>2</b>  |
| <b>3. Experimental Details and Data:</b> .....              | <b>4</b>  |
| <b>4. Conjugation with Recombinant Human Insulin:</b> ..... | <b>36</b> |
| <b>5. X-Ray Structure of 4:</b> .....                       | <b>42</b> |
| <b>6. References:</b> .....                                 | <b>45</b> |
| <b>7. NMR spectra of the new compounds:</b> .....           | <b>46</b> |

## 1. General Information

<sup>1</sup>H NMR spectra were recorded at 400 or 600 MHz at ambient temperature with CDCl<sub>3</sub> (Cambridge Isotope Laboratories, Inc.) as the solvent unless otherwise stated. <sup>13</sup>C NMR spectra were recorded at 101 or 151 MHz at ambient temperature with CDCl<sub>3</sub> as the solvent unless otherwise stated. Chemical shifts are reported in parts per million relative to CDCl<sub>3</sub> (<sup>1</sup>H, δ 7.26; <sup>13</sup>C, δ 77.0). All <sup>13</sup>C NMR spectra were recorded with complete proton decoupling. High-resolution mass spectra were obtained at the University at Albany-SUNY Core Facility Center using an Agilent G6530BA Q-TOF Mass Spectrometer. Analytical thin layer chromatography was performed on SiliCycle silica gel 60 F254 plates and flash column chromatography was performed on SiliCycle silica gel 60 (40–63 mm). Yields refer to chromatographically and spectroscopically pure materials unless otherwise stated. HATU was purchased from Genscript® (Piscataway, New Jersey). Recombinant human insulin was purchased from MP biomedical (Solon, Ohio). All other reagents were purchased from Sigma-Aldrich, Alfa Aesar, Chemimpex and Oakwood Chemicals. All commercially available materials were used without further purification. All reactions were carried out in oven-dried glassware under an argon atmosphere unless otherwise noted.

HPLC: All separations involved a mobile phase of 0.05% TFA (v/v) in water (solvent A)/acetonitrile (solvent B). Analytical LC-MS analyses were performed using a Waters 2695 Separations Module and an Agilent G6530BA Q-TOF Mass Spectrometer equipped with Higgins Analytical Proto 200 10 μm 250 × 4.6 nm C18 column, and Waters Microsorb 300-5, C4 250 × 2.0 mm columns at a flow rate of 0.3 mL/min. LC-MS analyses were performed using an Agilent G6530BA Q-TOF Mass Spectrometer. Preparative separations were performed using a Dionex Ultimate UHPLC system equipped with a UV detector and Proto reverse phase HPLC column Microsorb 200 C18 (250 × 20 mm) at a flow rate of 10.0 mL/min.

## 2. General Procedures

### A. Automated solid-phase peptide synthesis

Automated peptide synthesis was performed on a Pioneer peptide synthesis system (GEN600611). Peptides were synthesized under standard automated Fmoc protocols using DMF as solvent, deblocking for 5 min in piperidine/DBU/DMF (2:2:96, v/v/v), coupling for 25 min ('standard cycle'), or 55 min ('extended cycle') for amino acids such as prolines, valines, threonines, isoleucines and arginines using HATU as coupling reagent.

The following *α*-N-Fmoc or *α*-N-Boc-protected amino acids from Novabiochem, GL Biochem or CS Bio were employed in SPPS: Fmoc-Ala-OH, Fmoc-Arg(Pbf)-OH, Fmoc-Asn(Trt)-OH, Fmoc-Asp(O<sup>t</sup>Bu)-OH, Fmoc-Glu(O<sup>t</sup>Bu)-OH, Fmoc-Gln(Trt)-OH, Fmoc-Gly-OH, Fmoc-His(Trt)-OH, Fmoc-Ile-OH, Fmoc-Leu-OH, Fmoc-Lys(Boc)-OH, Fmoc-Met-OH, Fmoc-Phe-OH, Fmoc-Pro-OH, Fmoc-Ser(<sup>t</sup>Bu)-OH, Fmoc-

Thr(<sup>t</sup>Bu)-OH, Fmoc-Trp(Boc)-OH, Fmoc-Tyr-OH, Fmoc-Val-OH. (2S,4R)-Fmoc-4-mercaptopyrrolidine-2-carboxylic acid was from PolyPeptide Group.

### **B. Preparation of regular polypeptides**

Upon completion of the automated synthesis on a 0.05 mmol scale, the peptide resin was washed into a peptide synthesis vessel using CH<sub>2</sub>Cl<sub>2</sub>. Resin was treated with CH<sub>2</sub>Cl<sub>2</sub>/TFE/AcOH (8:1:1, v/v/v) solution 40 min (×3). The resin was then removed by filtration, the combined cleavage solution was concentrated under reduced pressure, and global deprotection was performed under the treatment of TFA/H<sub>2</sub>O/TIPS (95:2.5:2.5, v/v/v) solution for 20 min to 1 h, and the filtrate was concentrated under a nitrogen atmosphere. The residue was washed with cold diethyl ether to give a white solid, which was then dissolved in a mixture of acetonitrile and water containing 5% of acetic acid. The resulting solution was ready for HPLC purification after filtration.

### **C. Conjugation with peptides**

To a solution of the peptides (0.01 M) in 0.8 mL of THF/phosphate buffer solution (1:9, v/v, pH = 6.8) was added 2.2 equivalents of **1** (3.9 mg, 0.0177 mmol) in one portion. The reaction mixture was stirred at room temperature for 8 h and monitored by LC-MS. Upon completion, the reaction was diluted with distilled deionized water (2.0 mL) and further purified using preparative HPLC.

### **D. One-pot Conjugation and Cu-catalyzed Azide Alkyne Cycloaddition (double-click)**

To a solution of glycine methyl ester hydrochloride (2.7 mg, 0.024 mmol, 0.05 M) in 400 μL of phosphate buffer solution (pH = 6.8), was added **1** (8.8 mg, 0.04 mmol, 0.1 M) in 400 μL of *tert*-butanol. After degassing for 30 min, 0.048 mmol of azide compound (benzyl azide, *p*-azidoacetophenone, 4-(azidomethyl)-7-methoxy-2H-chromen-2-one, 1-azido-1-deoxy-β-D-glucopyranoside tetraacetate, 2-acetamido-3,4,6-tri-O-acetyl-2-deoxy-β-D-glucopyranosyl azide) was added to the mixture, followed by the addition of 5 μL of CuSO<sub>4</sub> (0.5 M in deionized water), 5 μL of freshly prepared sodium ascorbate (1 M in deionized water) and 5 μL of TBTA (0.5 M in *tert*-butanol).<sup>1</sup> The reaction mixture was stirred at room temperature for 8 h, monitored by LC-MS. Upon completion, the reaction was diluted by adding 3 mL of H<sub>2</sub>O and extracted by ethyl acetate (3 mL×3), combined, dried over Na<sub>2</sub>SO<sub>4</sub>. The solvents were removed in vacuo, the residue was purified by flash column chromatography to obtain the desired product.

### **E. One-pot Conjugation and Cu-catalyzed Azide Alkyne Cycloaddition (mono-click)**

To a solution of glycine methyl ester hydrochloride (2.7 mg, 0.024 mmol, 0.05 M) in 400 μL of phosphate buffer solution (pH = 6.8), was added **1** (8.8 mg, 0.04 mmol, 0.1 M) in 400 μL of *tert*-butanol. After degassing

for 30 min, 0.024 mmol of azide compound (benzyl azide, *p*-azidoacetophenone, biotin-PEG3-azide, 4-(azidomethyl)-7-methoxy-2H-chromen-2-one, 1-azido-1-deoxy- $\beta$ -D-glucopyranoside tetraacetate, 2-acetamido-3,4,6-tri-O-acetyl-2-deoxy- $\beta$ -D-glucopyranosyl azide) was added to the mixture, followed by the addition of 5  $\mu$ L of CuSO<sub>4</sub> (0.5 M in deionized water), 5  $\mu$ L of freshly prepared sodium ascorbate (1 M in deionized water) and 5  $\mu$ L of TBTA (0.5 M in *tert*-butanol). The reaction mixture was stirred at room temperature for 8 h, monitored by LC-MS. Upon completion, the reaction was diluted by adding 3 mL of H<sub>2</sub>O and extracted by ethyl acetate (3 mL $\times$ 3), combined, dried over Na<sub>2</sub>SO<sub>4</sub>. The solvents were removed in vacuo, the residue was purified by flash column chromatography to obtain the desired product.

#### **F. One-pot Conjugation and CuAAC with peptides**

To a solution of peptides (0.025 M) in 200  $\mu$ L of phosphate buffer solution (pH = 6.8), was added **1** (1.8 mg, 0.04 M) and 0.005 mmol of azide compound (4-(azidomethyl)-7-methoxy-2H-chromen-2-one, 1-Azido-1-deoxy- $\beta$ -D-glucopyranoside) in 200  $\mu$ L of *tert*-butanol. After degassing for 30 min, was added to the mixture followed by the addition of 5  $\mu$ L of CuSO<sub>4</sub> (0.1 M in deionized water), 5  $\mu$ L of freshly prepared sodium ascorbate (0.2 M in deionized water) and 5  $\mu$ L of TBTA (0.1 M in *tert*-butanol). The reaction mixture was stirred at room temperature for 8 h, monitored by LC-MS. Upon completion, the reaction was diluted with distilled deionized water (2.0 mL) and further purified using preparative HPLC. Mobile phase compositions were: solvent A: 0.1% TFA in H<sub>2</sub>O, solvent B: 0.1% TFA in CH<sub>3</sub>CN. The sample was eluted using a Higgins Analytical Proto 200 10  $\mu$ m 250  $\times$  4.6 nm C18 column.

#### **G. High resolution mass spectrometry/mass spectrometry measurements:**

*For compounds 11e, 11i-k, 11n-q:*

High resolution LC/MS/MS analysis was performed on an Agilent G6530BA Q-TOF Mass Spectrometer, operated with electrospray ionization in positive-ion mode. The tandem MS analysis of all the pure compounds was performed on the same Agilent MS instrument in the MS/MS mode using direct injection.

*For modified insulin:*

DTT was used to break all disulfide bonds. The procedure was: 5  $\mu$ L of 1 M DTT in water was added to 50  $\mu$ L of 1 mg/ml of the intact protein sample in deionized H<sub>2</sub>O. The solution was incubated for 1 h at 40  $^{\circ}$ C. The sample was diluted 100x in 0.1% TFA H<sub>2</sub>O/CH<sub>3</sub>CN (80:20, *v/v*), filtered and directly infused into the LC/MS system. The MS/MS experiments were carried out on the same Agilent MS instrument in the MS/MS mode. LC gradient conditions are described as below: The gradient started at 20% B then increasing to 90% B in 15 min at a flow rate of 0.5 mL/min. Mobile phase compositions were: solvent A: 0.1% TFA in H<sub>2</sub>O, solvent B: 0.1% TFA in CH<sub>3</sub>CN. The sample was eluted using a Higgins Analytical Proto 200 10  $\mu$ m 250  $\times$  4.6 nm C18 column.

## H. Bioassay Method:

The human monocyte cell line THP-1 was purchased from ATCC. Cells were routinely cultured in RPMI-1640 medium in T75 cm<sup>2</sup> flask supplemented with 10% (v/v) fetal bovine serum (FBS) and  $50 \times 10^{-6}$  m 2-mercaptoethanol at 37 °C in 5% CO<sub>2</sub> incubator. 0.06 mM AF546 azide (control) or **17** was incubated with  $1 \times 10^6$ /ml THP-1 cells for 4 h. After washing the cells for 3 times, cells were transferred to a 96 well plate for imaging. The same experiment for both control and **17** was repeated for 3 times. Fluorescence imaging was conducted on an Olympus IX73 inverted fluorescence microscope equipped with a yellow Cy3 filter set. A digital camera (Zyla sCMOS, Andor) mounted on the microscope was used to capture images using Andor SOLIS software.

## 3. Experiment details and data

### Synthesis of **4**

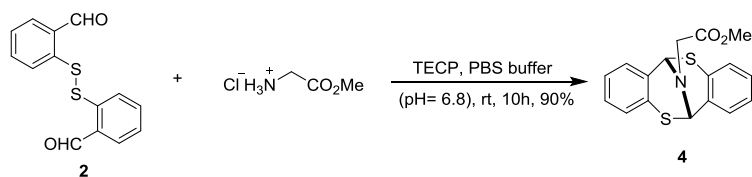

To a solution of glycine methyl ester hydrochloride (30 mg, 0.273 mmol) and tris(2-carboxyethyl)phosphine hydrochloride (210 mg, 0.731 mmol) in 3.6 mL of PBS buffer, was added Na<sub>2</sub>HPO<sub>4</sub> to adjust the pH of the solution to 6.8, followed by the addition of 2,2'-dithiodibenzaldehyde **2** (100 mg, 0.364 mmol) in 0.4 mL of tetrahydrofuran. The mixture was stirred at room temperature for 10 h, monitored by TLC. Upon completion, the resulting solution was diluted with 10 mL of water and extracted with ethyl acetate (15 mL×3), combined the organic phase, washed with water and brine. Removing solvents in vacuo, the residue was purified by silica gel column chromatography (hexane: ethyl acetate=5: 1) to give **4** (54.1 mg, 90%) as a white solid.  $R_f$  = 0.48 (hexane: EtOAc= 5: 1). **<sup>1</sup>H NMR** (400 MHz, CDCl<sub>3</sub>) 7.23 (2 H, s), 7.05 (4 H, s), 6.99 (2 H, s), 5.54 (2 H, s), 3.88 (1 H, d,  $J$  17.2), 3.74 (3 H, s), 3.53 (1 H, d,  $J$  17.2). **<sup>13</sup>C NMR** (101 MHz, CDCl<sub>3</sub>)  $\delta$  169.85, 132.66, 129.32, 129.24, 127.84, 127.55, 124.85, 61.87, 54.96, 52.10. **IR** (thin film): cm<sup>-1</sup> 1740, 1219, 741, 671. **HRMS** (ESI<sup>+</sup>): calculated for C<sub>17</sub>H<sub>16</sub>NO<sub>2</sub>S<sub>2</sub> [M+H]<sup>+</sup> 330.0622 found 330.0633.

### Synthesis of **10**

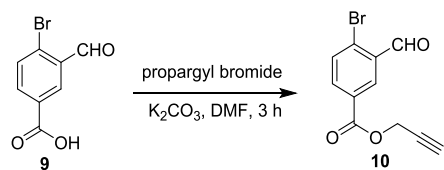

To a solution of commercial available 4-bromo-3-formyl-benzoic acid **9**<sup>3</sup> (184 mg, 0.807 mmol) in 6 mL of dimethyl formamide was added potassium carbonate (233 mg, 1.62 mmol), followed by the addition of propargyl bromide (0.16 mL, 1.06 mmol, 80% in toluene). The mixture was stirred for 3 h at room temperature, TLC showed fully consumption of starting material. The mixture was diluted with 20 mL water, extracted with ethyl acetate (30 mL×3), combined organic phase, washed with water and brine. Remove the solvent in vacuo, the residue was purified by silica gel column chromatography (hexane: ethyl acetate= 2: 1) to give **10** (204 mg, 95%) as a white solid.  $R_f = 0.64$  (hexane: EtOAc= 2: 1). <sup>1</sup>H NMR (400 MHz, CDCl<sub>3</sub>) δ 10.38 (s, 1H), 8.56 (d,  $J = 2.2$  Hz, 1H), 8.12 (dd,  $J = 8.3, 2.2$  Hz, 1H), 7.77 (d,  $J = 8.4$  Hz, 1H), 4.95 (d,  $J = 2.4$  Hz, 2H), 2.55 (t,  $J = 2.5$  Hz, 1H). <sup>13</sup>C NMR (151 MHz, CDCl<sub>3</sub>) δ 190.66, 164.17, 135.63, 134.40, 133.70, 132.06, 131.21, 129.57, 77.09, 75.56, 53.03. IR (thin film): cm<sup>-1</sup> 3283, 2870, 2130, 1725, 1695, 1593, 1291, 1178, 1098. HRMS (ESI<sup>+</sup>): calculated for C<sub>11</sub>H<sub>8</sub>BrO<sub>3</sub> [M+H]<sup>+</sup> 266.9657, found: 266.9650.

### Synthesis of **1**

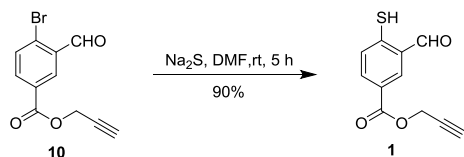

To a solution of compound **10** (650 mg, 2.443 mmol) in 18 mL of dimethyl formamide was added sodium sulfide (381 mg, 4.887 mmol). The mixture was stirred for 5h at room temperature, TLC showed fully consumption of starting material. The mixture was diluted with 20 mL ethyl acetate, washed with 1 M HCl (15 mL×2). The aqueous phase was extracted with ethyl acetate (30 mL×3), combined organic phase, washed with water and brine. Remove the solvent in vacuo, the obtained residue was purified by silica gel column chromatography (hexane: ethyl acetate= 1: 1) to give **1** (484 mg, 90%) as a yellow solid.  $R_f = 0.27$  (hexane: EtOAc= 1: 1). <sup>1</sup>H NMR (400 MHz, CDCl<sub>3</sub>) δ 10.23 (s, 1H), 8.55 (s, 1H), 8.11 (d,  $J = 8.1$  Hz, 1H), 7.81 (d,  $J = 8.1$  Hz, 1H), 4.94 (s, 2H), 2.53 (s, 1H). <sup>13</sup>C NMR (101 MHz, CDCl<sub>3</sub>) δ 191.33, 164.07, 145.56, 136.53, 134.58, 133.60, 132.48, 127.74, 126.29, 75.50, 52.93. IR (thin film): cm<sup>-1</sup> 3283, 2930, 2866, 1718, 1697, 1599, 1433, 1371, 1286, 1244, 1180, 1105, 1056, 1024, 758. HRMS (ESI<sup>+</sup>): calculated for C<sub>11</sub>H<sub>8</sub>O<sub>3</sub>S [M+H]<sup>+</sup> 221.0272, found: 221.0261.

### Synthesis of **11**

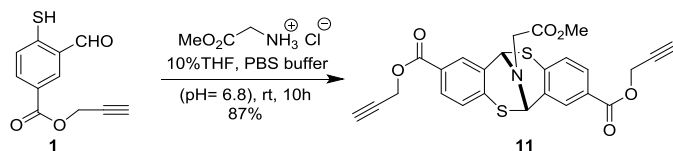

To a solution of the glycine methyl ester hydrochloride (5.1 mg, 0.046 mmol) in 1 mL of phosphate buffer solution (pH = 6.8), was added **1** (20 mg, 0.091 mmol) in 100  $\mu$ L of tetrahydrofuran. The reaction mixture was stirred at room temperature for 8 h, monitored by TLC. Upon completion, the mixture was diluted by adding 5 mL of H<sub>2</sub>O and extracted by ethyl acetate (5 mL $\times$ 3), combined, dried over Na<sub>2</sub>SO<sub>4</sub>. The solvents were removed in vacuo, the obtained residue was purified by silica gel column chromatography (hexane: ethyl acetate= 2: 1) to give **11** (19.7 mg, 88%) as a white solid.  $R_f$ = 0.43 (hexane: EtOAc= 2: 1). **<sup>1</sup>H NMR** (400 MHz, CDCl<sub>3</sub>)  $\delta$  7.94 (s, 2H), 7.75 (d,  $J$  = 8.6 Hz, 2H), 7.10 (d,  $J$  = 8.3 Hz, 2H), 5.68 (s, 2H), 4.99 – 4.78 (m, 4H), 3.86 (d,  $J$  = 17.2 Hz, 1H), 3.77 (s, 3H), 3.53 (d,  $J$  = 17.2 Hz, 1H), 2.52 (t,  $J$  = 2.4 Hz, 1H). **<sup>13</sup>C NMR** (151 MHz, CDCl<sub>3</sub>)  $\delta$  169.40, 164.97, 136.64, 132.50, 130.56, 128.74, 127.78, 126.09, 77.59, 75.14, 61.88, 54.83, 52.53, 52.34. **IR** (thin film): cm<sup>-1</sup> 3281, 2879, 1749, 1717, 1601, 1260, 1242, 1219, 1109, 759. **HRMS** (ESI<sup>+</sup>): calculated for C<sub>25</sub>H<sub>20</sub>NO<sub>6</sub>S<sub>2</sub> [M+H]<sup>+</sup> 494.0732, found: 494.0722.

### Synthesis of **11a**

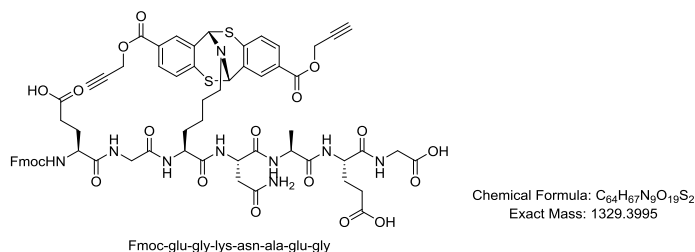

According to General Procedure **A** and **B**, peptide Fmoc-EGKNAEG was prepared by a three-step protocol on a 0.05 mmol scale. The conjugation with peptide Fmoc-EGKNAEG was according to General Procedure **C**. Purification of the crude peptide using preparative HPLC (35 to 95% solvent B over 25 min, Higgins Analytical Proto 200 10  $\mu$ m 250  $\times$  20 nm C18 column) afforded the desired modified peptide **11a** as a white solid after lyophilization (8.8 mg, 83%). Analytical HPLC:  $t_R$  = 9.1 min (50 to 95% solvent B over 13 min, Higgins Analytical Proto 200 10  $\mu$ m 250  $\times$  4.6 nm C18 column); HRMS (ESI<sup>+</sup>): calculated for C<sub>64</sub>H<sub>68</sub>N<sub>9</sub>O<sub>19</sub>S<sub>2</sub> [M+H]<sup>+</sup> 1330.4073, found: 1330.4146.

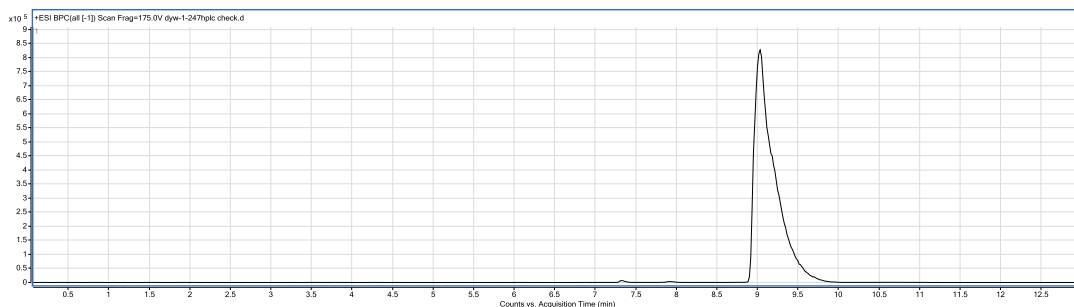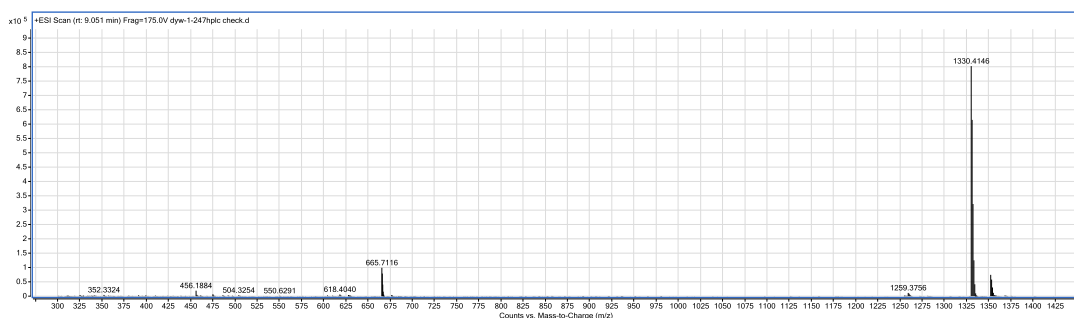

## Synthesis of **11b**

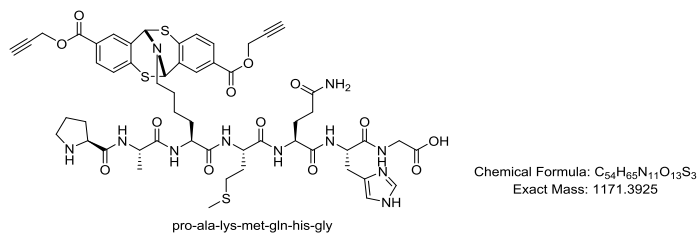

According to General Procedure **A** and **B**, peptide PAKMQHG was prepared by a three-step protocol on a 0.05 mmol scale. The conjugation with peptide PAKMQHG was according to General Procedure **C**. Purification of the crude peptide using preparative HPLC (35 to 95% solvent B over 25 min, Higgins Analytical Proto 200 10  $\mu$ m 250  $\times$  20 nm C18 column) afforded the desired modified peptide **11b** as a white solid after lyophilization (8.2 mg, 88%). Analytical HPLC:  $t_R = 8.1$  min (35 to 95% solvent B over 12 min, Higgins Analytical Proto 200 10  $\mu$ m 250  $\times$  4.6 nm C18 column); HRMS (ESI+): calculated for  $C_{54}H_{66}N_{11}O_{13}S_3$   $[M+H]^+$  1172.4004, found: 1172.3977.

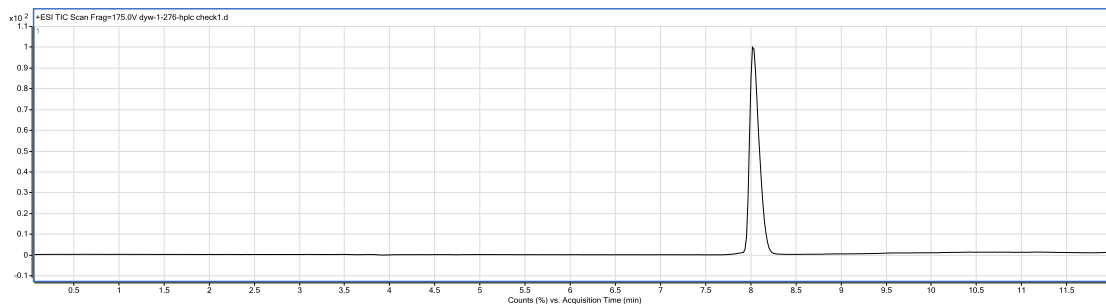



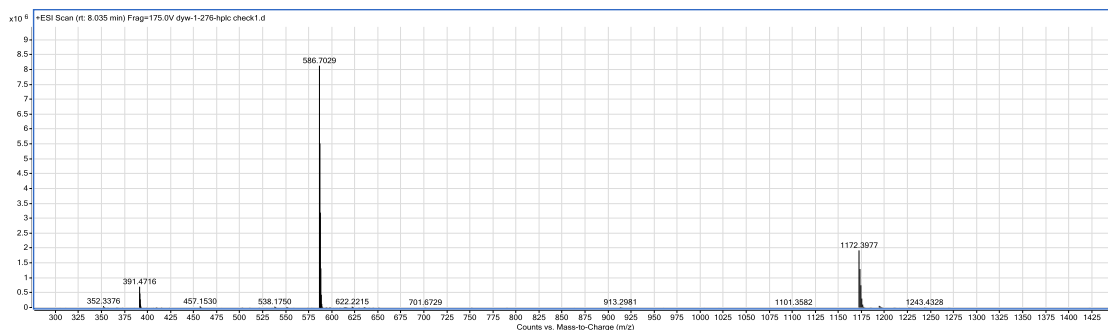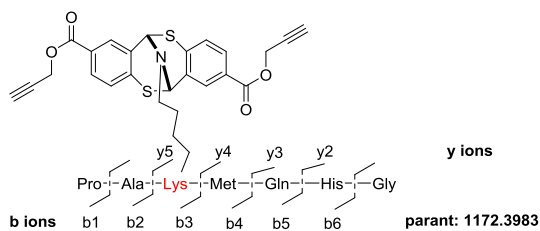

| Ion     | Cal (Da) | Found (Da) | Ion | Cal (Da)  | Found (Da) |
|---------|----------|------------|-----|-----------|------------|
| b1(-CO) | 70.0651  | 70.0651    | b6* | 1097.3683 | 1097.3629  |
| b2      | 169.0977 | 169.0968   | y2  | 213.0982  | 213.0968   |
| b3*     | 701.2104 | 701.2083   | y3  | 341.1568  | 341.1566   |
| b4*     | 832.2509 | 832.2450   | y4  | 472.1973  | 472.1962   |
| b5*     | 960.3094 | 960.3063   | y5* | 1004.3099 | 1004.3078  |

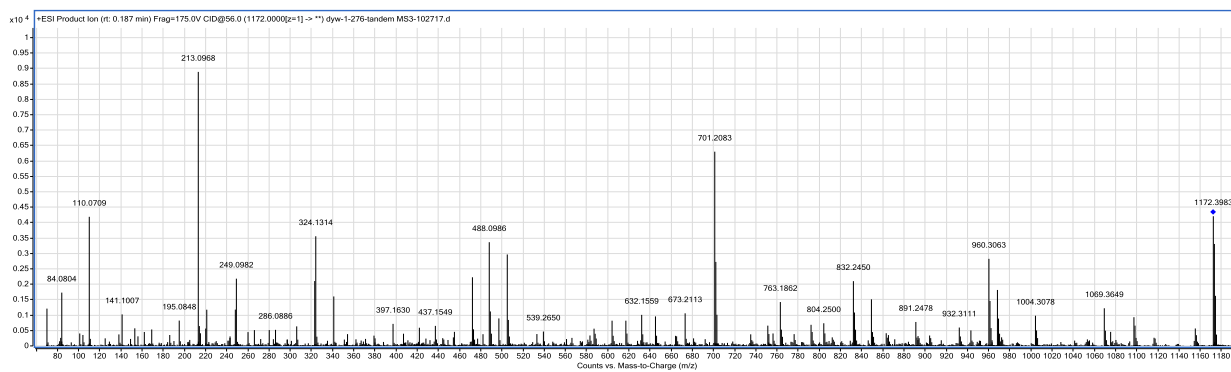

MS/MS analysis of modified peptide **11b**. \*denotes fragments containing the modification.

*Synthesis of 11c*

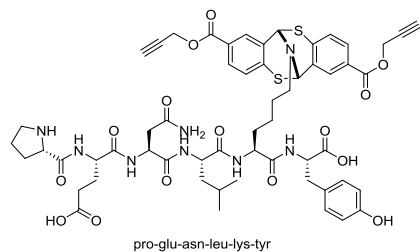

Chemical Formula:  $C_{57}H_{66}N_8O_{15}S_2$   
Exact Mass: 1166.4089

According to General Procedure **A** and **B**, peptide PENLKY was prepared by a three-step protocol on a 0.05 mmol scale. The conjugation with peptide PENLKY was according to General Procedure **C**. Purification of the crude peptide using preparative HPLC (35 to 90% solvent B over 25 min, Higgins Analytical Proto 200 10  $\mu$ m 250  $\times$  20 nm C18 column) afforded the desired modified peptide **11c** as a white solid after lyophilization (8.4 mg, 90%). Analytical HPLC:  $t_R = 7.6$  min (35 to 95% solvent B over 12 min, Higgins Analytical Proto 200 10  $\mu$ m 250  $\times$  4.6 nm C18 column); HRMS (ESI+): calculated for  $C_{57}H_{67}N_8O_{15}S_2$   $[M+H]^+$  1167.4167, found: 1167.4192.

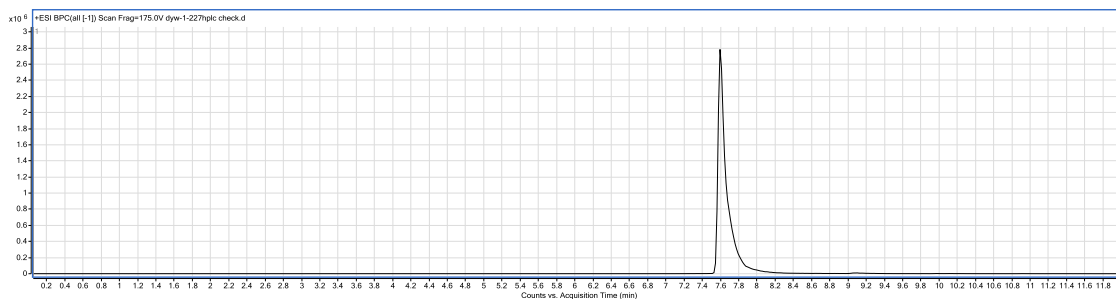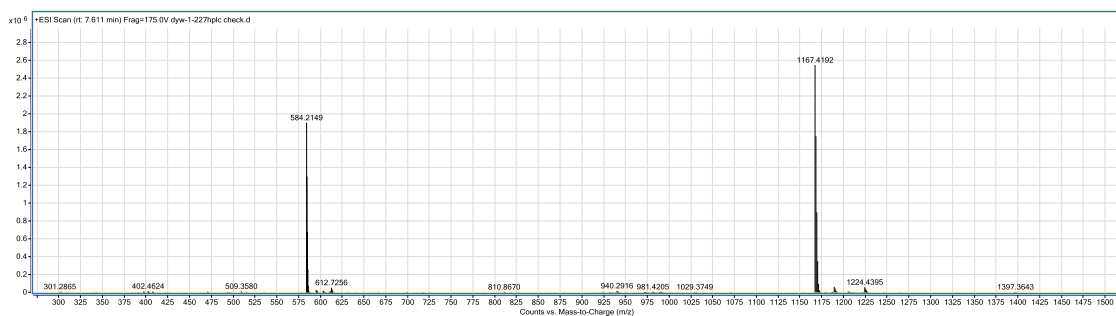

### Synthesis of **11d**

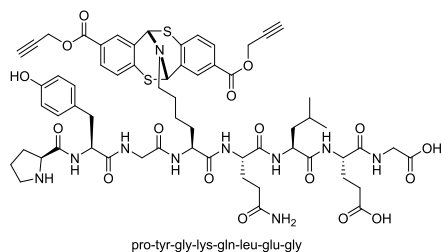

Chemical Formula:  $C_{82}H_{74}N_{10}O_{17}S_2$   
Exact Mass: 1294.4675

According to General Procedure **A** and **B**, peptide PYGKQLEG was prepared by a three-step protocol on

a 0.05 mmol scale. The conjugation with peptide PYGKQLEG was according to General Procedure C. Purification of the crude peptide using preparative HPLC (30 to 90% solvent B over 25 min, Higgins Analytical Proto 200 10  $\mu$ m 250  $\times$  20 nm C18 column) afforded the desired modified peptide **11d** as a white solid after lyophilization (8.7 mg, 84%). Analytical HPLC:  $t_R$  = 8.1 min (35 to 95% solvent B over 12 min, Higgins Analytical Proto 200 10  $\mu$ m 250  $\times$  4.6 nm C18 column); HRMS (ESI+): calculated for  $C_{62}H_{75}N_{10}O_{17}S_2$   $[M+H]^+$  1295.4753, found: 1295.4780.

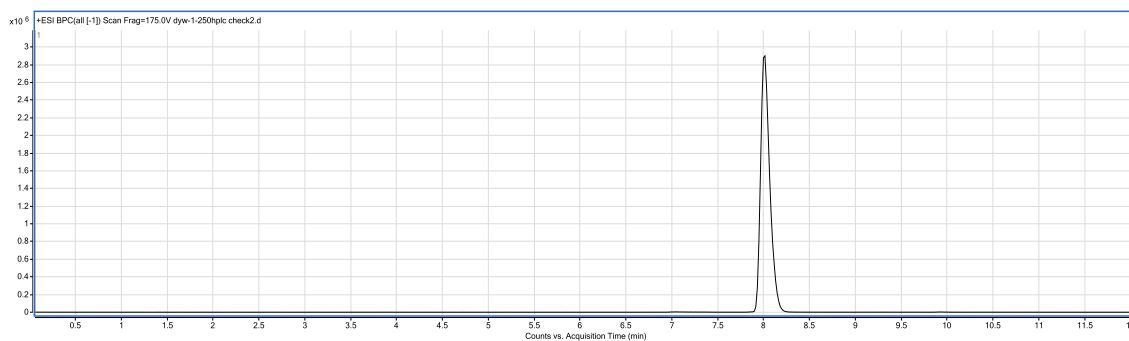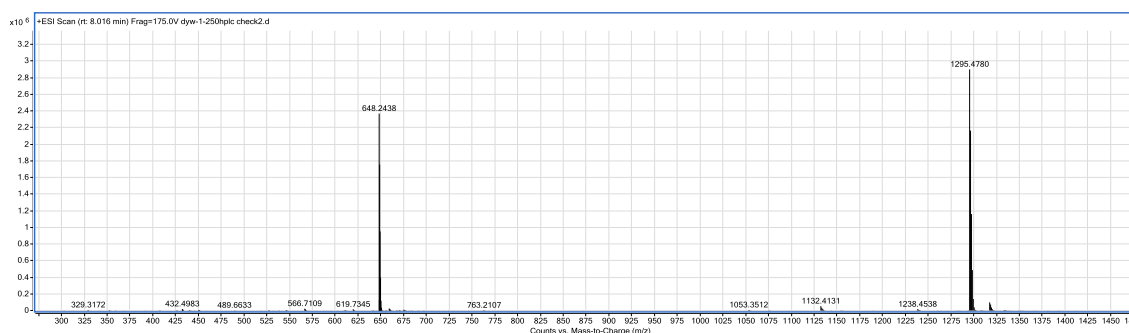

### Synthesis of **11e**

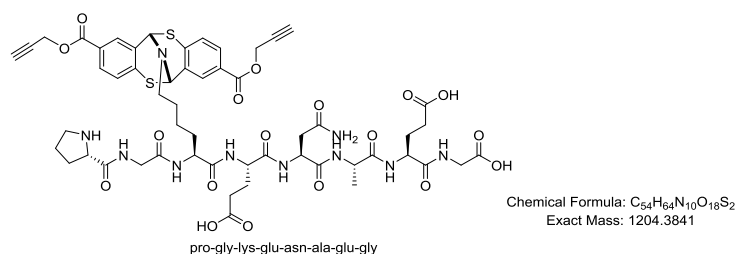

According to General Procedure A and B, peptide PGKENAEG was prepared by a three-step protocol on a 0.05 mmol scale. The conjugation with peptide PGKENAEG was according to General Procedure C. Purification of the crude peptide using preparative HPLC (35 to 90% solvent B over 25 min, Higgins Analytical Proto 200 10  $\mu$ m 250  $\times$  20 nm C18 column) afforded the desired modified peptide **11e** as a white solid after lyophilization (8.7 mg, 90%). Analytical HPLC:  $t_R$  = 9.7 min (35 to 95% solvent B over 15 min, Higgins Analytical Proto 200 10  $\mu$ m 250  $\times$  4.6 nm C18 column); HRMS (ESI+): calculated for

$C_{54}H_{65}N_{10}O_{18}S_2$   $[M+H]^+$  1205.3920, found: 1205.3915.

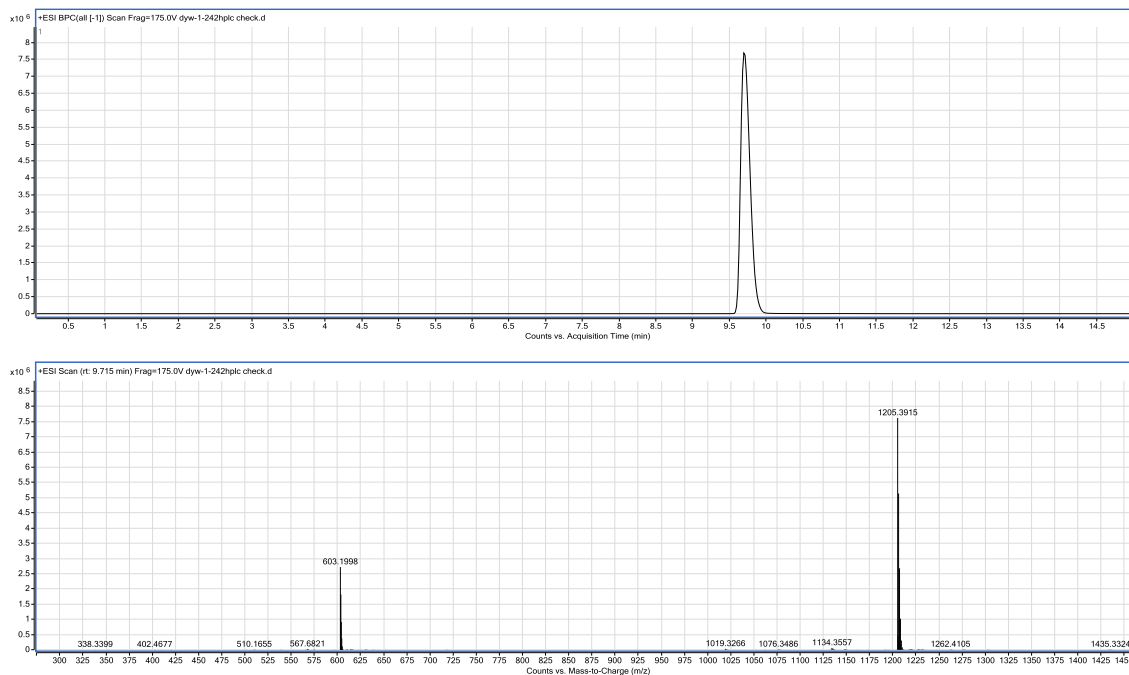

### Synthesis of **11f**

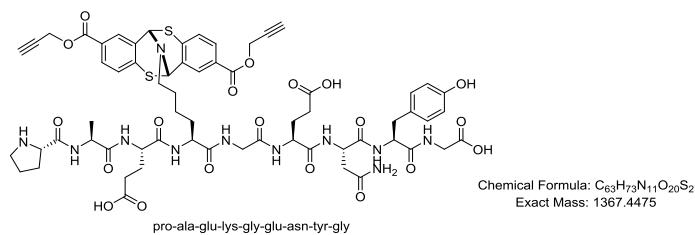

According to General Procedure **A** and **B**, peptide PAEKGENY $G$  was prepared by a three-step protocol on a 0.05 mmol scale. The conjugation with peptide PAEKGENY $G$  was according to General Procedure **C**. Purification of the crude peptide using preparative HPLC (35 to 90% solvent B over 25 min, Higgins Analytical Proto 200 10  $\mu$ m 250  $\times$  20 nm C18 column) afforded the desired modified peptide **11f** as a white solid after lyophilization (9.4 mg, 86%). Analytical HPLC:  $t_R$  = 10.7 min (35 to 95% solvent B over 15 min, Higgins Analytical Proto 200 10  $\mu$ m 250  $\times$  4.6 nm C18 column); HRMS (ESI $^+$ ): calculated for  $C_{63}H_{74}N_{11}O_{20}S_2$   $[M+H]^+$  1368.4553, found: 1368.4569.

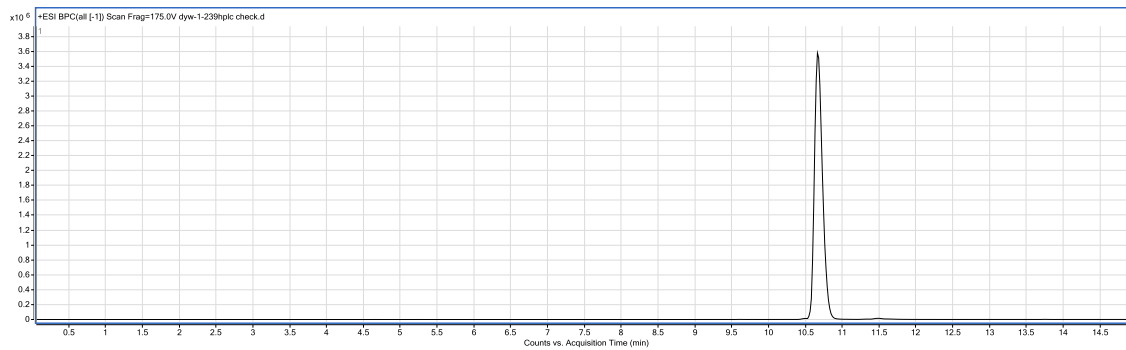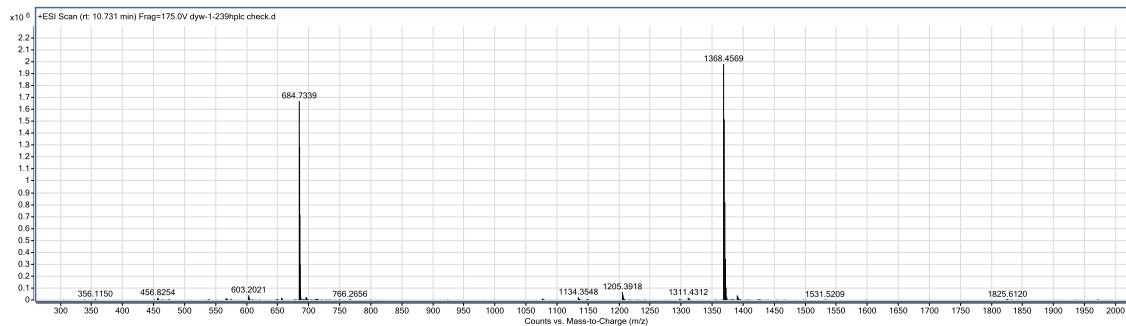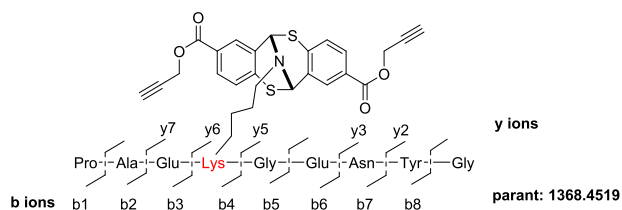

| Ion     | Cal (Da)  | Found (Da) | Ion | Cal (Da)  | Found (Da) |
|---------|-----------|------------|-----|-----------|------------|
| b1(-CO) | 70.0651   | 70.0652    | b8* | 1293.4233 | 1293.4205  |
| b2      | 169.0977  | 169.0956   | y2  | 239.1026  | 239.1022   |
| b3      | 298.1403  | 298.1384   | y3  | 353.1456  | 353.1432   |
| b4*     | 830.2530  | 830.2490   | y5  | 539.2096  | 539.2137   |
| b5*     | 887.2744  | 887.2704   | y6  | 1071.3223 | 1071.3146  |
| b6*     | 1016.3170 | 1016.3125  | y7  | 1220.3649 | 1220.3651  |
| b7*     | 1130.3599 | 1130.3566  |     |           |            |

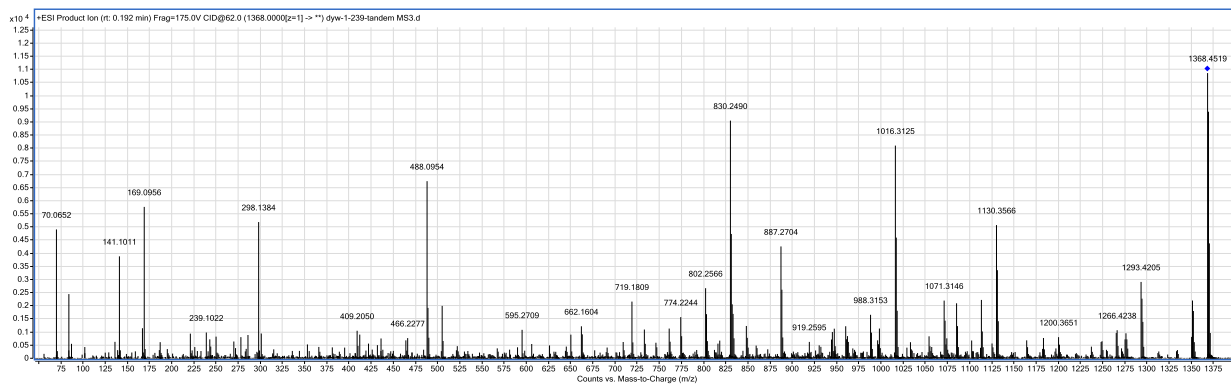

MS/MS analysis of modified peptide **11f**. \*denotes fragments containing the modification.

### Synthesis of **11g**

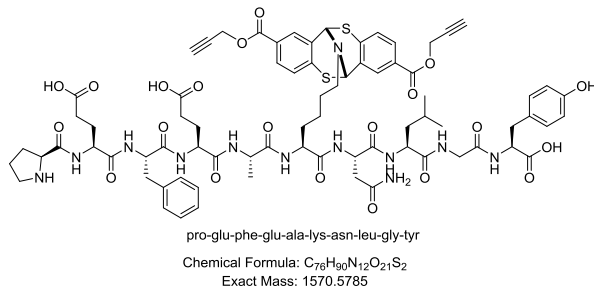

According to General Procedure **A** and **B**, peptide PEFEAKNLGY was prepared by a three-step protocol on a 0.05 mmol scale. The conjugation with peptide PEFEAKNLGY was according to General Procedure **C**. Purification of the crude peptide using preparative HPLC (40 to 90% solvent B over 25 min, Higgins Analytical Proto 200 10 μm 250 × 20 nm C18 column) afforded the desired modified peptide **11g** as a white solid after lyophilization (11.1 mg, 88%). Analytical HPLC:  $t_R = 11.8$  min (35 to 95% solvent B over 15 min, Higgins Analytical Proto 200 10 μm 250 × 4.6 nm C18 column); HRMS (ESI<sup>+</sup>): calculated for C<sub>76</sub>H<sub>91</sub>N<sub>12</sub>O<sub>21</sub>S<sub>2</sub> [M+H]<sup>+</sup> 1571.5863, found: 1571.5917.

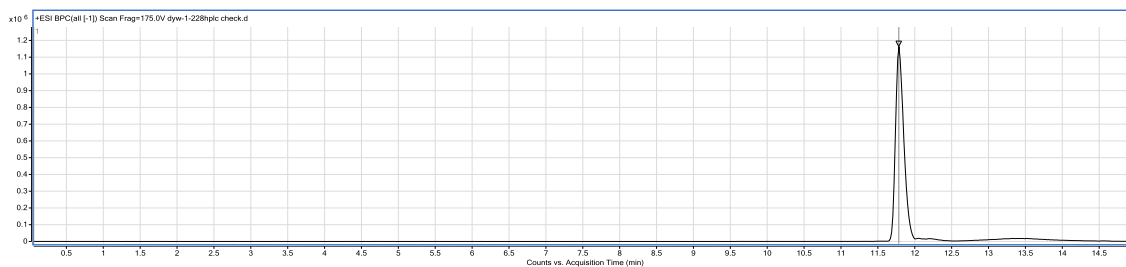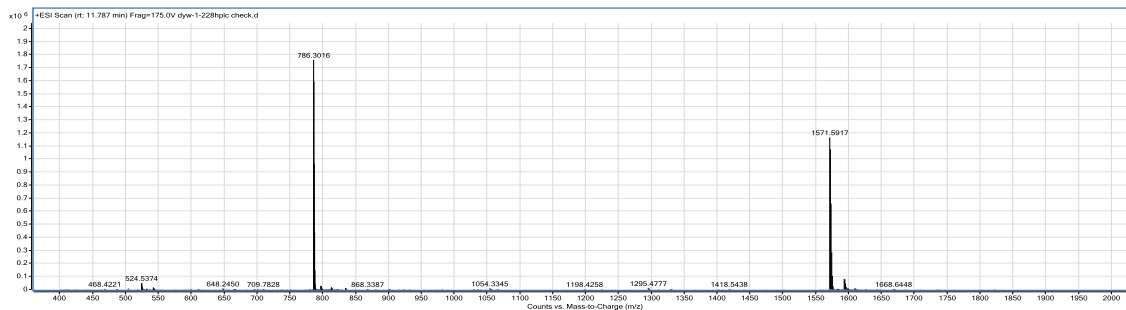

| Ion     | Cal (Da) | Found (Da) | Ion | Cal (Da)  | Found (Da) |
|---------|----------|------------|-----|-----------|------------|
| b1(-CO) | 70.0651  | 70.0651    | b8* | 1333.4904 | 1333.4867  |
| b2      | 227.1026 | 227.1020   | b9* | 1390.5124 | 1390.5100  |
| b3      | 374.1716 | 374.1687   | y4  | 466.2296  | 466.2255   |
| b4      | 503.2142 | 503.2119   | y5  | 998.3423  | 998.3450   |
| b5      | 574.2508 | 574.2482   | y6  | 1050.3306 | 1050.3359  |

|     |           |           |    |           |           |
|-----|-----------|-----------|----|-----------|-----------|
| b6* | 1106.3634 | 1106.3601 | y7 | 1198.4220 | 1198.4277 |
| b7* | 1220.4069 | 1220.4058 | y8 | 1345.4904 | 1345.4816 |

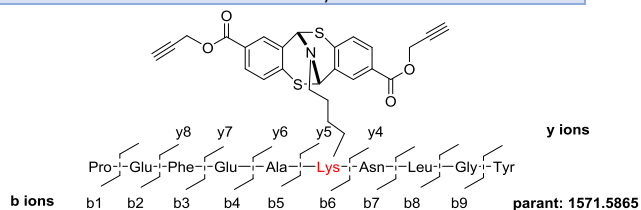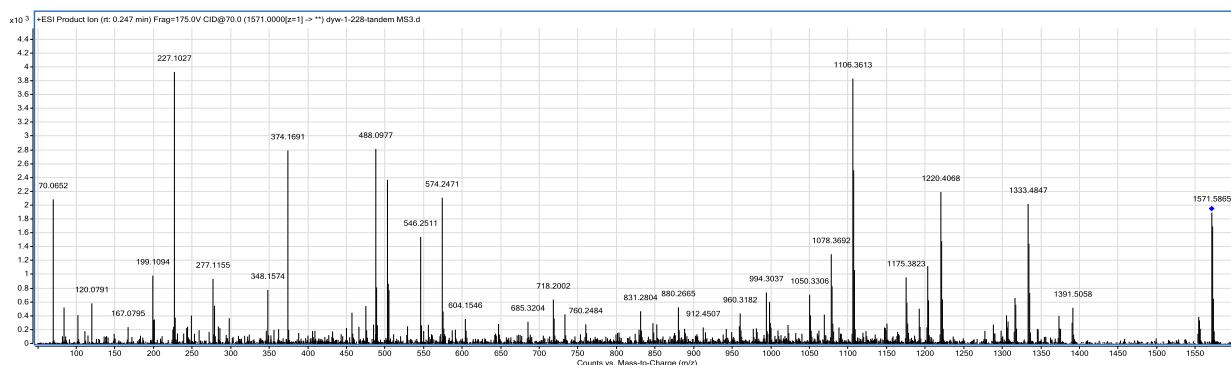

MS/MS analysis of modified peptide **11g**. \*denotes fragments containing the modification.

### Synthesis of **11h**

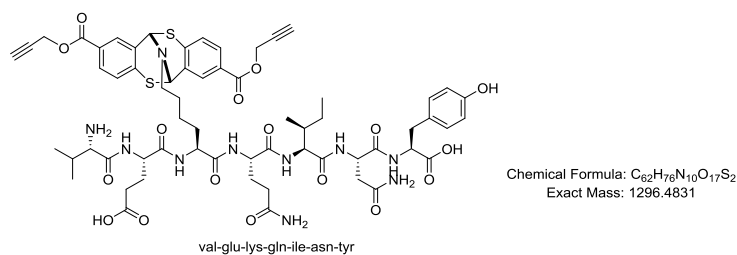

According to General Procedure **A** and **B**, peptide VEKQINY was prepared by a three-step protocol on a 0.05 mmol scale. The conjugation with peptide VEKQINY was according to General Procedure **C**. Purification of the crude peptide using preparative HPLC (35 to 90% solvent B over 25 min, Higgins Analytical Proto 200 10  $\mu$ m 250  $\times$  20 nm C18 column) afforded the desired modified peptide **11h** as a white solid after lyophilization (8.6 mg, 82%). Analytical HPLC:  $t_R$  = 10.5 min (35 to 95% solvent B over 13 min, Higgins Analytical Proto 200 10  $\mu$ m 250  $\times$  4.6 nm C18 column); HRMS (ESI<sup>+</sup>): calculated for C<sub>62</sub>H<sub>77</sub>N<sub>10</sub>O<sub>17</sub>S<sub>2</sub> [M+H]<sup>+</sup> 1297.4910, found: 1297.4983.

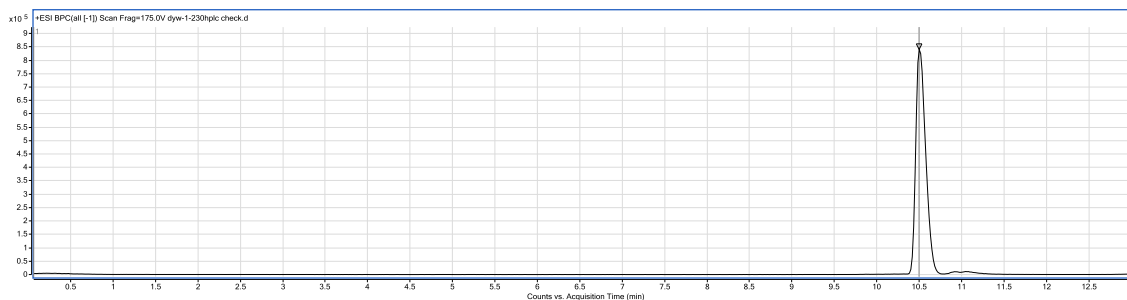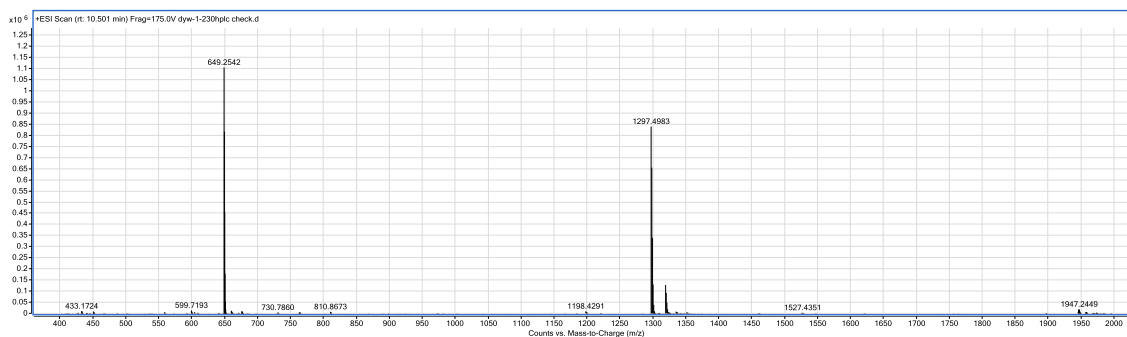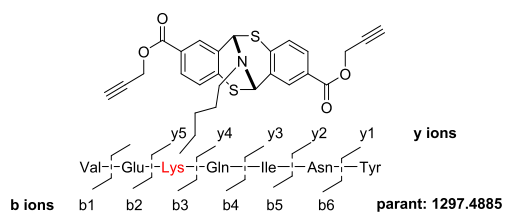

| Ion | Cal (Da)  | Found (Da) | Ion | Cal (Da)  | Found (Da) |
|-----|-----------|------------|-----|-----------|------------|
| b1  | 101.0841  | 101.0717   | y1  | 136.0757  | 136.0753   |
| b2  | 228.1110  | 228.1348   | y2  | 296.1241  | 296.1234   |
| b3* | 761.2309  | 761.2291   | y3  | 409.2082  | 409.2042   |
| b4* | 889.2895  | 889.2894   | y4  | 537.2667  | 537.2644   |
| b5* | 1002.3736 | 1002.3701  | y5* | 1069.3794 | 1069.3739  |
| b6* | 1116.4065 | 1116.4086  |     |           |            |

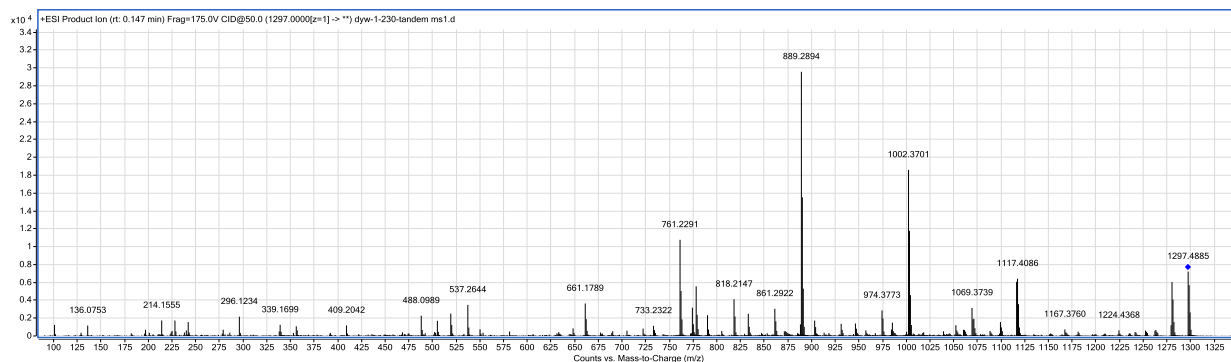

MS/MS analysis of modified peptide **11h**. \*denotes fragments containing the modification.



## Synthesis of **11i**

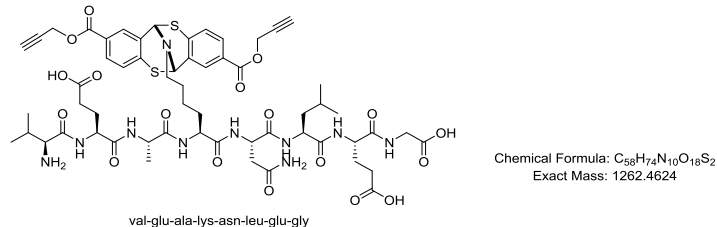

According to General Procedure **A** and **B**, peptide VEAKNLEG was prepared by a three-step protocol on a 0.05 mmol scale. The conjugation with peptide VEAKNLEG was according to General Procedure **C**. Purification of the crude peptide using preparative HPLC (35 to 95% solvent B over 25 min, Higgins Analytical Proto 200 10  $\mu$ m 250  $\times$  20 nm C18 column) afforded the desired modified peptide **11i** as a white solid after lyophilization (7.9 mg, 78%). Analytical HPLC:  $t_R$  = 8.3 min (40 to 95% solvent B over 12 min, Higgins Analytical Proto 200 10  $\mu$ m 250  $\times$  4.6 nm C18 column); HRMS (ESI+): calculated for  $C_{58}H_{75}N_{10}O_{18}S_2$   $[M+H]^+$  1263.4702, found: 1263.4734.

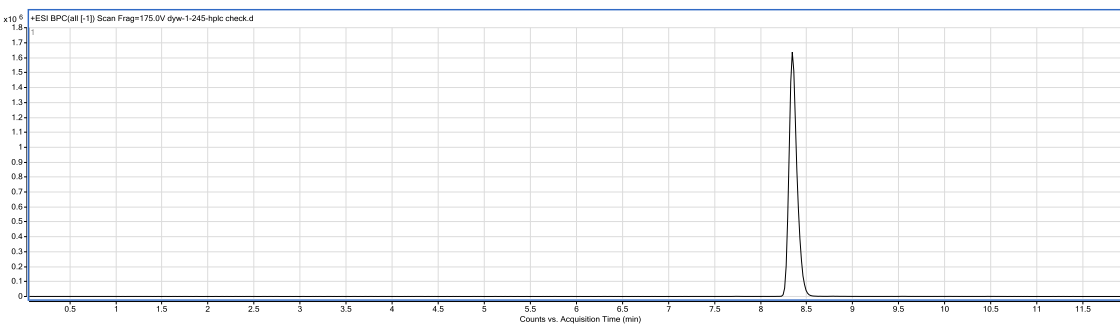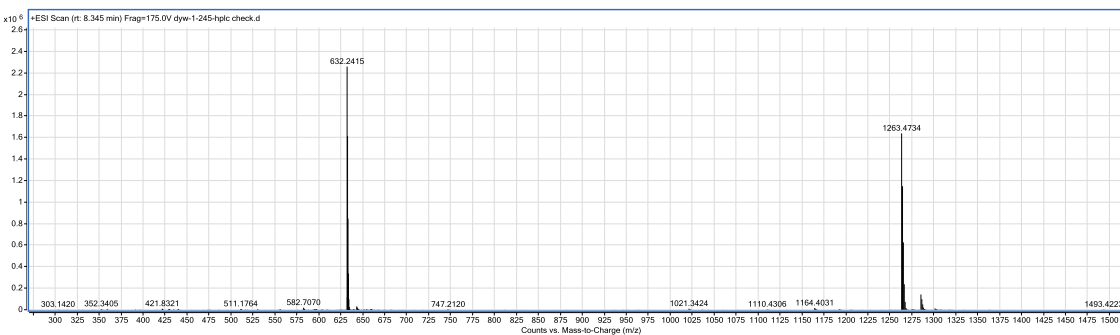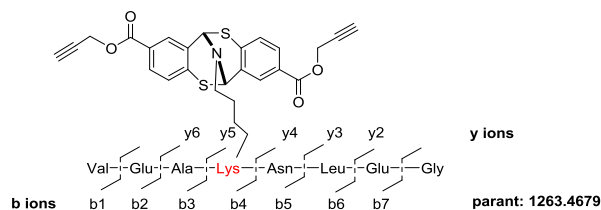

| Ion | Cal (Da) | Found (Da) | Ion | Cal (Da)  | Found (Da) |
|-----|----------|------------|-----|-----------|------------|
| b1  | 101.0841 | 101.0713   | b7* | 1188.4376 | 1188.4341  |

|     |           |           |                       |           |           |
|-----|-----------|-----------|-----------------------|-----------|-----------|
| b2  | 228.1110  | 228.1342  | y6*                   | 1035.3587 | 1035.3596 |
| b3  | 300.1554  | 300.1551  | y5*                   | 964.3216  | 964.3229  |
| b4* | 832.2681  | 832.2683  | y4                    | 432.2089  | 432.2092  |
| b5* | 946.3110  | 946.3092  | y3(-H <sub>2</sub> O) | 300.1559  | 300.1551  |
| b6* | 1059.3951 | 1059.3933 | y2                    | 188.0553  | 188.0744  |

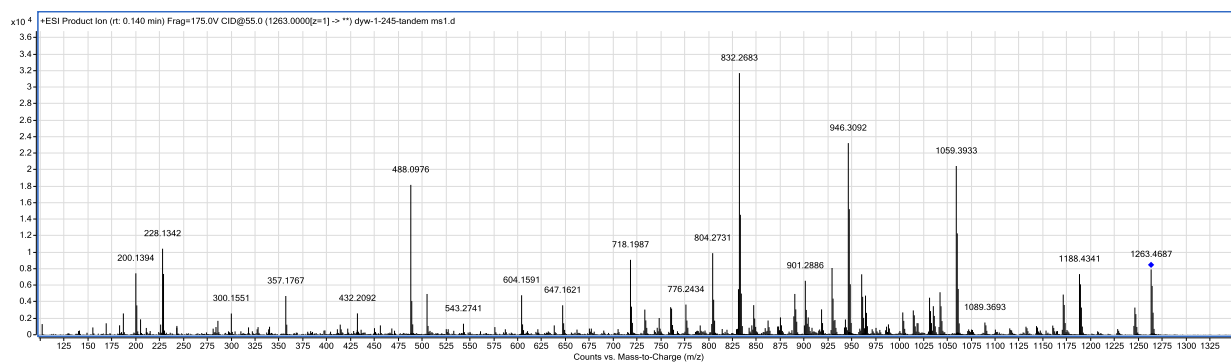

MS/MS analysis of modified peptide **11i**. \*denotes fragments containing the modification.

### Synthesis of **11j**

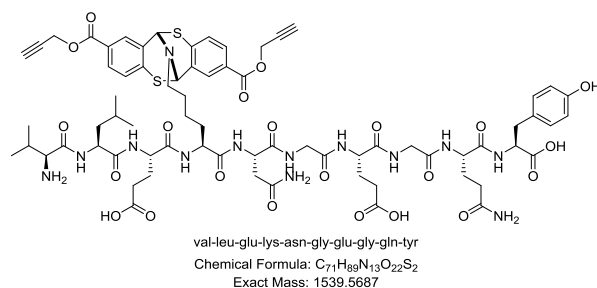

According to General Procedure **A** and **B**, peptide VLEKNGEGQY was prepared by a three-step protocol on a 0.05 mmol scale. The conjugation with peptide VLEKNGEGQY was according to General Procedure **C**. Purification of the crude peptide using preparative HPLC (35 to 95% solvent B over 25 min, Higgins Analytical Proto 200 10  $\mu$ m 250  $\times$  20 nm C18 column) afforded the desired modified peptide **11j** as a white solid after lyophilization (8.8 mg, 71%). Analytical HPLC:  $t_R$  = 8.4 min (40 to 95% solvent B over 12 min, Higgins Analytical Proto 200 10  $\mu$ m 250  $\times$  4.6 nm C18 column); HRMS (ESI<sup>+</sup>): calculated for C<sub>71</sub>H<sub>90</sub>N<sub>13</sub>O<sub>22</sub>S<sub>2</sub> [M+H]<sup>+</sup> 1540.5765, found: 1540.5812.

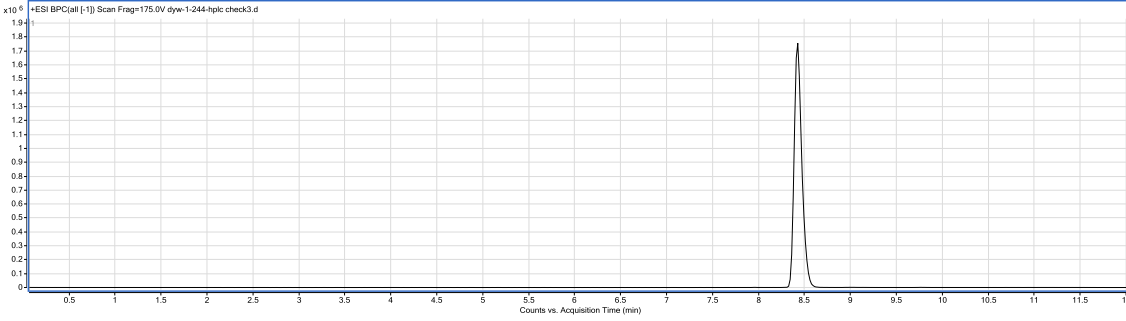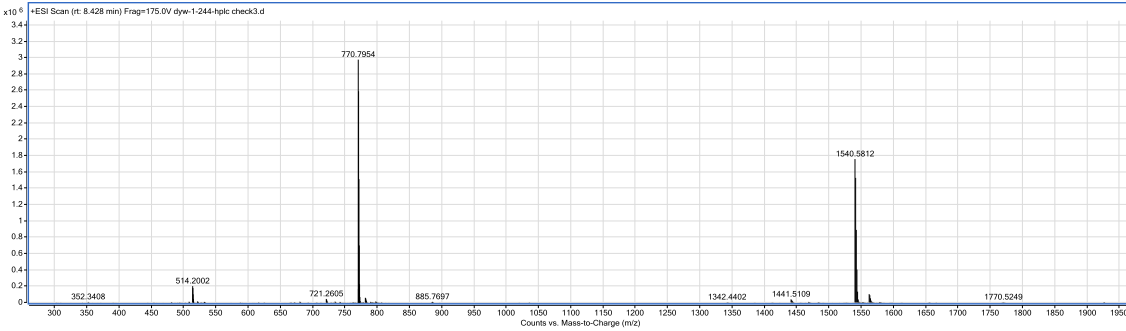

| Ion | Cal (Da)  | Found (Da) | Ion | Cal (Da)  | Found (Da) |
|-----|-----------|------------|-----|-----------|------------|
| b1  | 101.0841  | 101.0709   | y8* | 1328.424  | 1328.4198  |
| b2  | 213.1603  | 213.1595   | y7* | 1199.3809 | 1199.3732  |
| b3  | 342.2029  | 342.2068   | y6  | 667.2682  | 667.2662   |
| b4* | 874.3156  | 874.3131   | y5  | 553.2258  | 553.2286   |
| b5* | 988.3585  | 988.3554   | y4  | 496.2044  | 496.2050   |
| b6* | 1045.3794 | 1045.3784  | y3  | 367.1618  | 367.1591   |
| b7* | 1174.422  | 1174.4203  | y2  | 310.1403  | 310.1408   |
| b8* | 1231.4435 | 1231.4434  | y1  | 136.0757  | 136.0751   |
| b9* | 1359.502  | 1359.4969  |     |           |            |

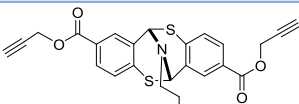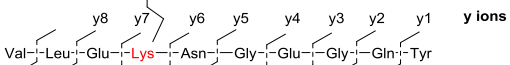

**b ions** b1 b2 b3 b4 b5 b6 b7 b8 b9 **parant: 1540.5683**

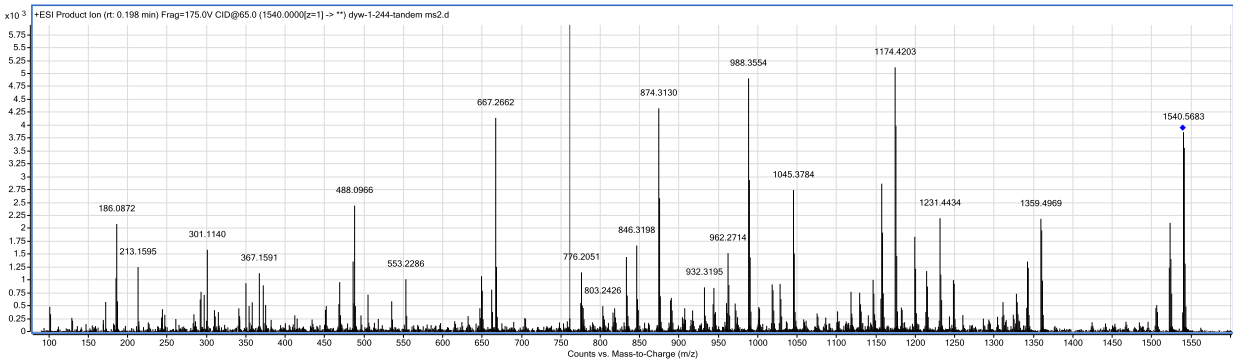

MS/MS analysis of modified peptide **11j**. \*denotes fragments containing the modification.

## Synthesis of **11k**

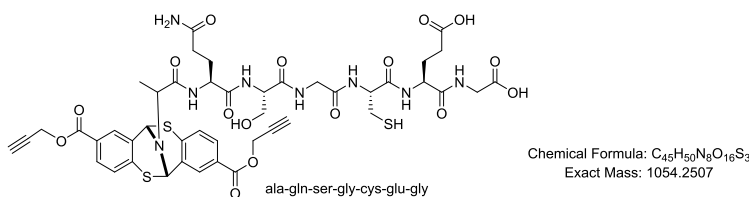

According to General Procedure **A** and **B**, peptide AQS $\bar{G}$ CEG was prepared by a three-step protocol on a 0.05 mmol scale. The conjugation with peptide AQS $\bar{G}$ CEG was according to General Procedure **C**. Purification of the crude peptide using preparative HPLC (35 to 90% solvent B over 25 min, Higgins Analytical Proto 200 10  $\mu$ m 250  $\times$  20 nm C18 column) afforded the desired modified peptide **11k** as a white solid after lyophilization (7.2 mg, 85%). Analytical HPLC:  $t_R$  = 9.1 min (35 to 95% solvent B over 12 min, Higgins Analytical Proto 200 10  $\mu$ m 250  $\times$  4.6 nm C18 column); HRMS (ESI $^+$ ): calculated for  $C_{45}H_{51}N_8O_{16}S_3$  [M+H] $^+$  1055.2585, found: 1055.2615.

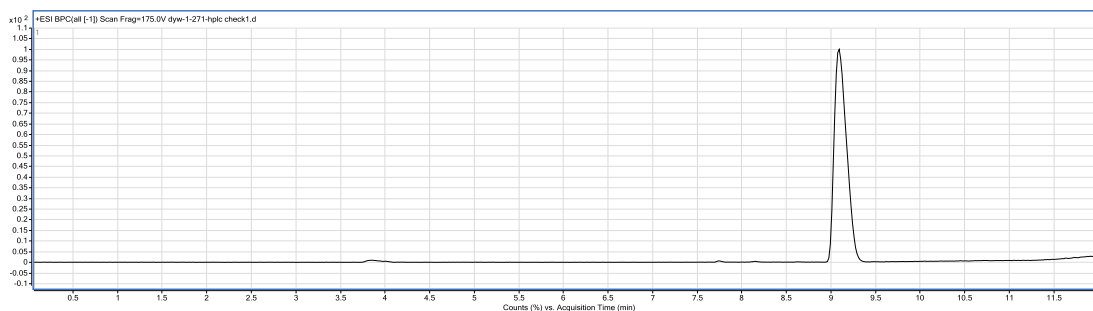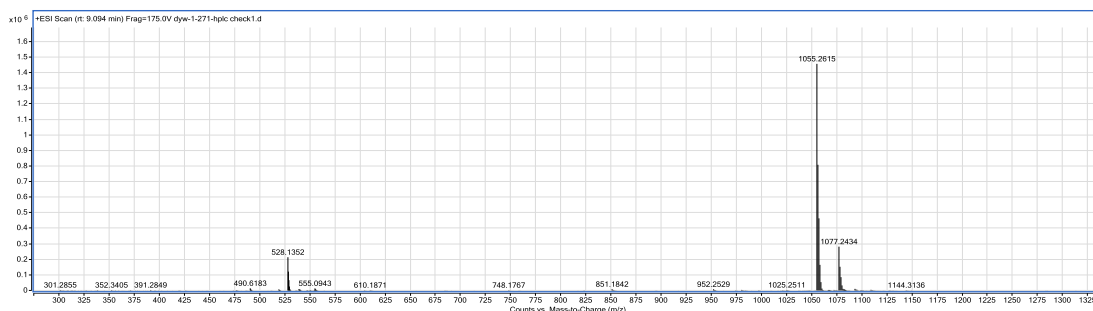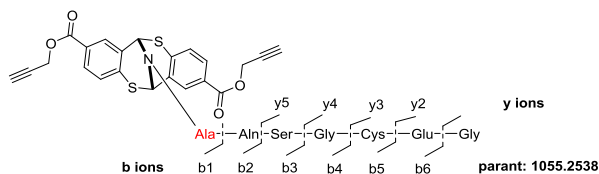

| Ion | Cal (Da) | Found (Da) | Ion | Cal (Da) | Found (Da) |
|-----|----------|------------|-----|----------|------------|
| b1* | 476.0626 | 476.0586   | b6* | 980.2265 | 980.2236   |

|     |          |          |                       |          |          |
|-----|----------|----------|-----------------------|----------|----------|
| b2* | 604.1212 | 604.1213 | y2                    | 205.0819 | 205.0769 |
| b3* | 691.1532 | 691.1510 | y3(-H <sub>2</sub> O) | 290.0805 | 290.0826 |
| b4* | 748.1747 | 748.1714 | y4(-H <sub>2</sub> O) | 347.1020 | 347.1015 |
| b5* | 851.1839 | 851.1801 | y5                    | 452.1446 | 452.1425 |

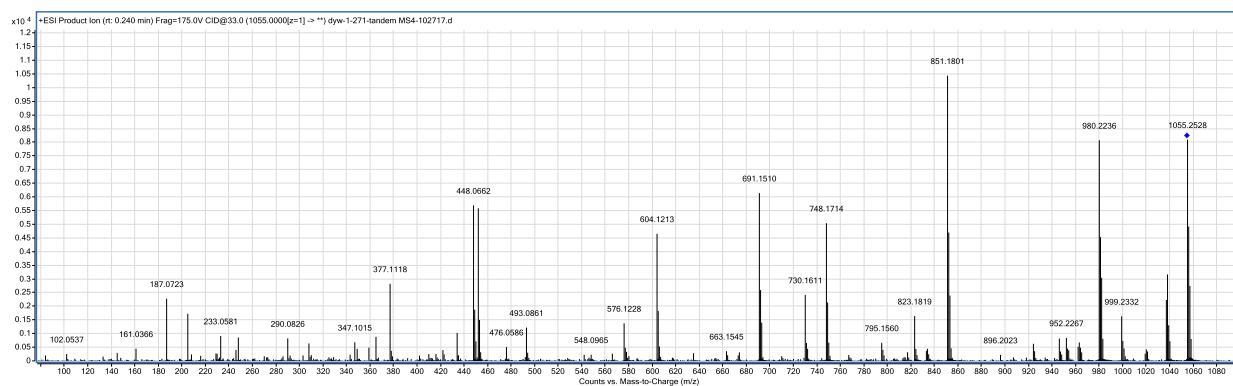

MS/MS analysis of modified peptide **11k**. \*denotes fragments containing the modification.

### Synthesis of **11l**

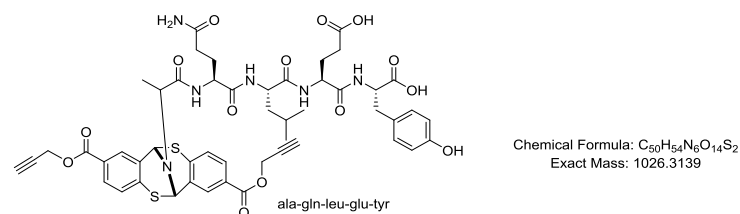

According to General Procedure **A** and **B**, peptide AQLEY was prepared by a three-step protocol on a 0.05 mmol scale. The conjugation with peptide AQLEY was according to General Procedure **C**. Purification of the crude peptide using preparative HPLC (35 to 90% solvent B over 25 min, Higgins Analytical Proto 200 10 μm 250 × 20 nm C18 column) afforded the desired modified peptide **11l** as a white solid after lyophilization (6.6 mg, 81%). Analytical HPLC:  $t_R = 9.8$  min (35 to 95% solvent B over 12 min, Higgins Analytical Proto 200 10 μm 250 × 4.6 nm C18 column); HRMS (ESI+): calculated for C<sub>50</sub>H<sub>55</sub>N<sub>6</sub>O<sub>14</sub>S<sub>2</sub> [M+H]<sup>+</sup> 1027.3218, found: 1027.3215.

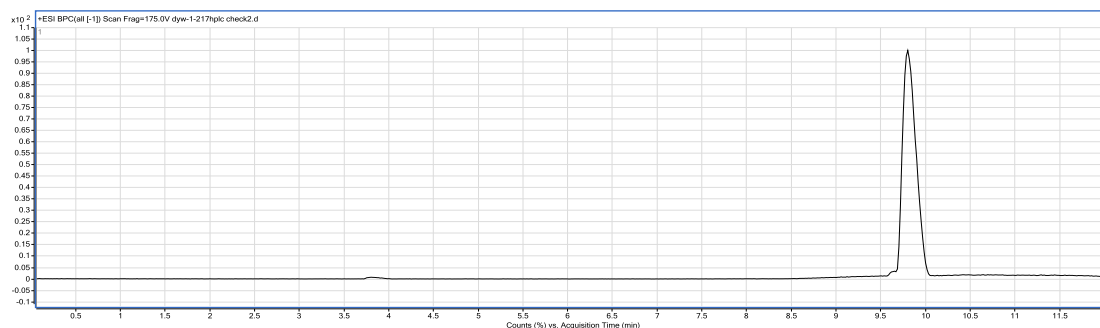

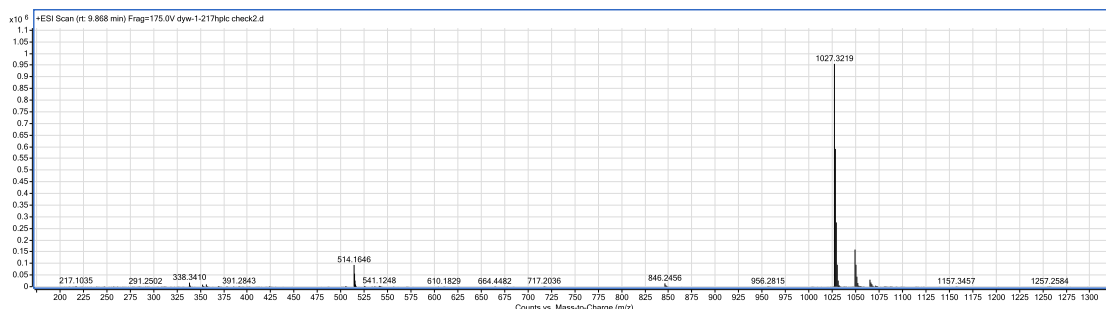

## Synthesis of **11m**

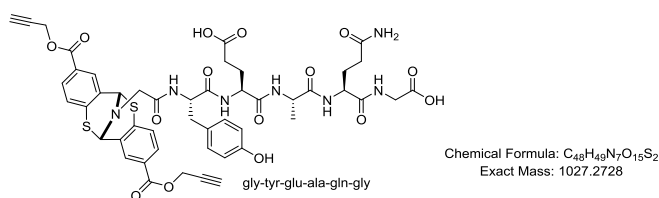

According to General Procedure **A** and **B**, peptide GYEAQG was prepared by a three-step protocol on a 0.05 mmol scale. The conjugation with peptide GYEAQG was according to General Procedure **C**. Purification of the crude peptide using preparative HPLC (30 to 90% solvent B over 25 min, Higgins Analytical Proto 200 10  $\mu$ m 250  $\times$  20 nm C18 column) afforded the desired modified peptide **11m** as a white solid after lyophilization (6.1 mg, 75%). Analytical HPLC:  $t_R$  = 9.2 min (35 to 95% solvent B over 12 min, Higgins Analytical Proto 200 10  $\mu$ m 250  $\times$  4.6 nm C18 column); HRMS (ESI<sup>+</sup>): calculated for  $C_{48}H_{50}N_7O_{15}S_2$  [M+H]<sup>+</sup> 1028.2806, found: 1028.2805.

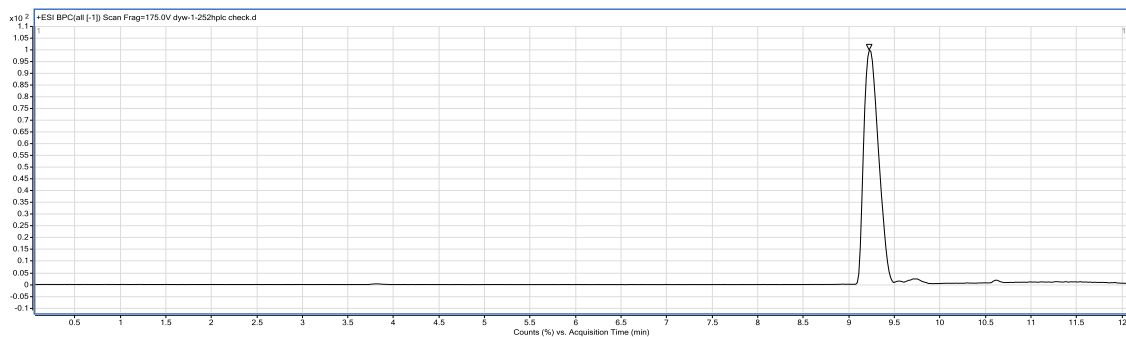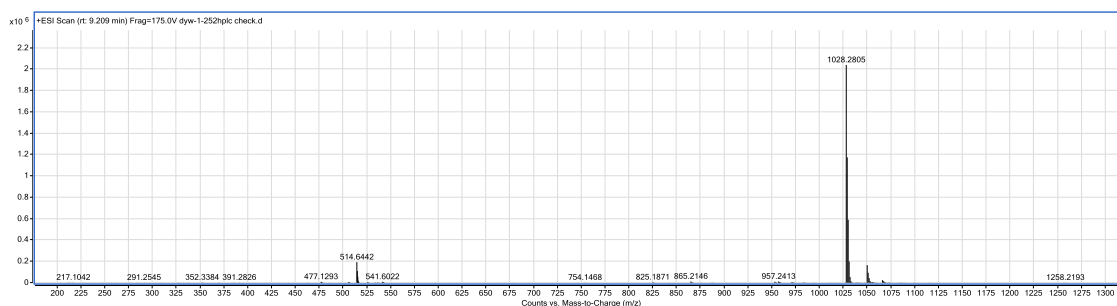

## Synthesis of **11n**

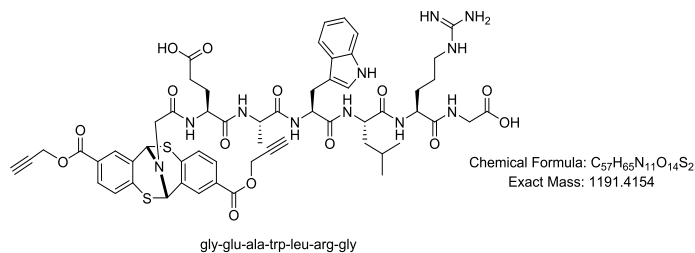

According to General Procedure **A** and **B**, peptide GEAWLRG was prepared by a three-step protocol on a 0.05 mmol scale. The conjugation with peptide GEAWLRG was according to General Procedure **C**. Purification of the crude peptide using preparative HPLC (35 to 95% solvent B over 25 min, Higgins Analytical Proto 200 10  $\mu$ m 250  $\times$  20 nm C18 column) afforded the desired modified peptide **11n** as a white solid after lyophilization (8.5 mg, 89%). Analytical HPLC:  $t_R$  = 9.3 min (35 to 95% solvent B over 12 min, Higgins Analytical Proto 200 10  $\mu$ m 250  $\times$  4.6 nm C18 column); HRMS (ESI<sup>+</sup>): calculated for  $C_{57}H_{66}N_{11}O_{14}S_2$  [M+H]<sup>+</sup> 1192.4232, found: 1192.4256.

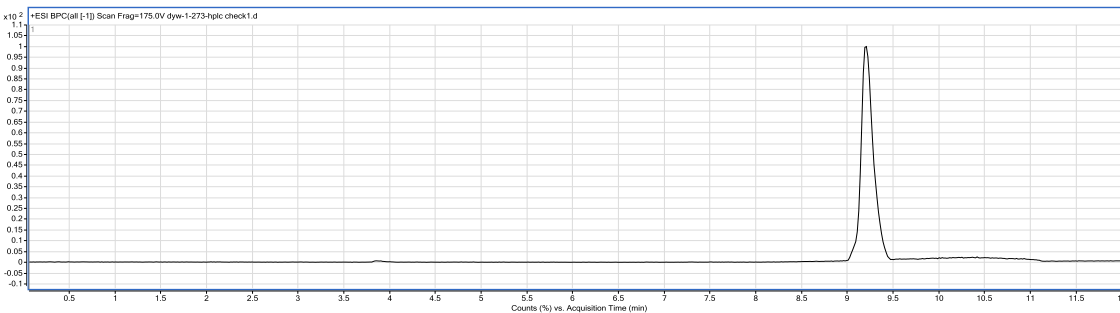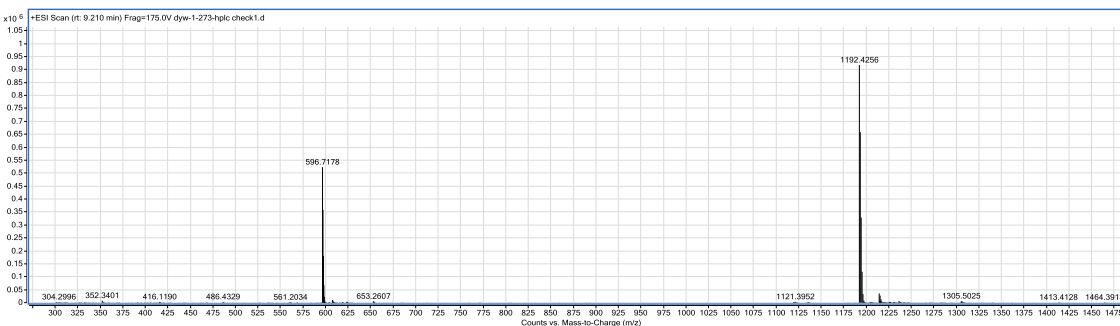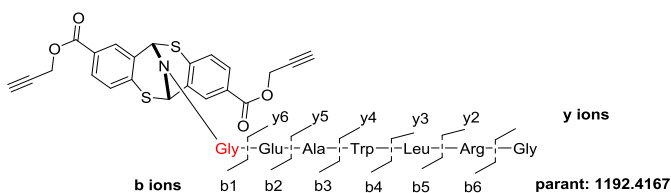

| Ion                    | Cal (Da)  | Found (Da) | Ion                   | Cal (Da) | Found (Da) |
|------------------------|-----------|------------|-----------------------|----------|------------|
| b1(-CO)*               | 434.0515  | 434.0514   | y2(-H <sub>2</sub> O) | 215.1139 | 215.1125   |
| b2*                    | 591.0896  | 591.0881   | y3                    | 345.2245 | 345.2215   |
| b3*                    | 662.1267  | 662.1219   | y4                    | 531.3038 | 531.2947   |
| b4(-CO)*               | 820.2105  | 820.2034   | y5                    | 602.3409 | 602.3394   |
| b5*                    | 933.3946  | 933.3941   | y6                    | 731.3835 | 731.3830   |
| b6*(+H <sub>2</sub> O) | 1135.3912 | 1135.3900  |                       |          |            |

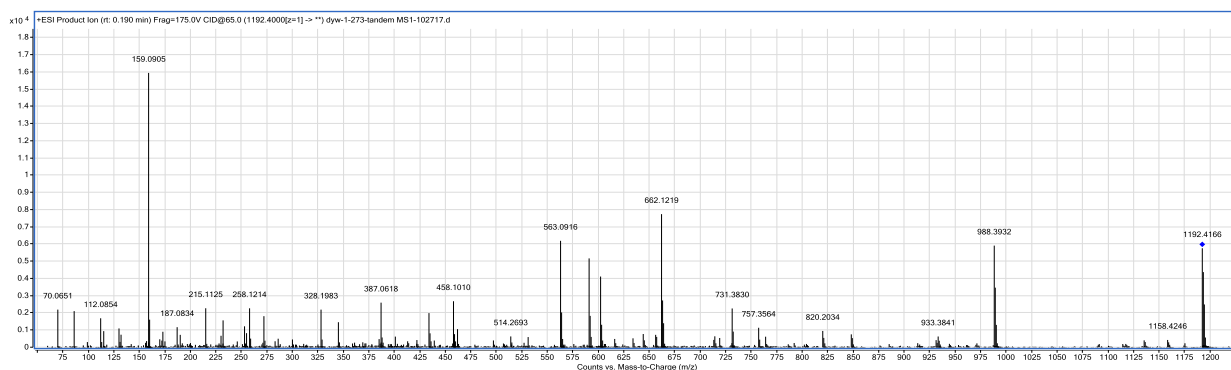

MS/MS analysis of modified peptide **11n**. \*denotes fragments containing the modification.

### Synthesis of **13a**

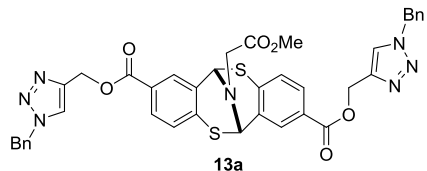

Compound **13a** was prepared according to General Procedure **D**. The obtained residue was purified by silica gel column chromatography (hexane: ethyl acetate= 1: 1) to give **13a** (13.2 mg, 87%) as a white solid.  $R_f$ = 0.28 (hexane: EtOAc= 1: 1).  $^1\text{H NMR}$  (400 MHz,  $\text{CDCl}_3$ )  $\delta$  7.87 (s, 2H), 7.68 (d,  $J$  = 8.4 Hz, 2H), 7.59 (s, 2H), 7.46 – 7.21 (m, 10H), 7.04 (d,  $J$  = 8.2 Hz, 2H), 5.62 (s, 2H), 5.52 (s, 4H), 5.40 (q,  $J$  = 12.8 Hz, 4H), 3.83 (d,  $J$  = 17.1 Hz, 1H), 3.76 (s, 3H), 3.49 (d,  $J$  = 17.0 Hz, 1H).  $^{13}\text{C NMR}$  (151 MHz,  $\text{CDCl}_3$ )  $\delta$  169.37, 165.55, 143.09, 136.36, 134.28, 132.40, 130.44, 129.15, 128.84, 128.62, 128.15, 127.62, 126.37, 123.88, 61.78, 58.01, 54.76, 54.23, 52.29. **IR** (thin film):  $\text{cm}^{-1}$  2981, 2889, 2253, 1746, 1715, 1603, 1375, 1239, 1110, 1046, 904, 723, 648. **HRMS** (ESI+): calculated for  $\text{C}_{39}\text{H}_{34}\text{N}_7\text{O}_6\text{S}_2$   $[\text{M}+\text{H}]^+$  760.2012, found: 760.2015.

### Synthesis of **13b**



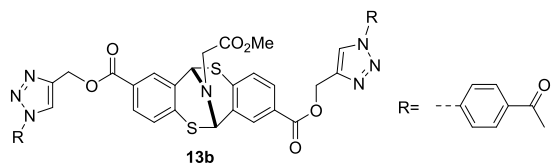

Compound **13b** was prepared according to General Procedure **D**. The obtained residue was purified by silica gel column chromatography (hexane: ethyl acetate= 1: 2) to give **13b** (8.2 mg, 86%) as a white solid.  $R_f$  = 0.33 (hexane: EtOAc= 1: 2).  $^1\text{H NMR}$  (400 MHz,  $\text{CDCl}_3$ )  $\delta$  8.19 (s, 2H), 8.12 (d,  $J$  = 8.4 Hz, 2H), 7.97 – 7.82 (m, 3H), 7.73 (d,  $J$  = 8.6 Hz, 2H), 7.07 (d,  $J$  = 8.5 Hz, 2H), 5.65 (s, 2H), 5.53 (q,  $J$  = 12.6 Hz, 4H), 3.84 (d,  $J$  = 17.2 Hz, 1H), 3.75 (s, 3H), 3.50 (d,  $J$  = 16.8 Hz, 1H), 2.66 (s, 6H).  $^{13}\text{C NMR}$  (151 MHz,  $\text{CDCl}_3$ )  $\delta$  196.50, 169.37, 165.66, 143.91, 139.86, 137.04, 136.60, 132.50, 130.53, 130.10, 128.69, 127.75, 126.27, 122.22, 120.18, 61.85, 57.86, 54.78, 29.69, 26.68. **IR** (thin film):  $\text{cm}^{-1}$  2952, 2923, 2854, 1717, 1685, 1604, 1442, 1360, 1263, 1243, 1177, 1112, 960, 840. **HRMS** (ESI<sup>+</sup>): calculated for  $\text{C}_{41}\text{H}_{34}\text{N}_7\text{O}_8\text{S}_2$   $[\text{M}+\text{H}]^+$  816.1910, found: 816.1903.

#### Synthesis of **13c**

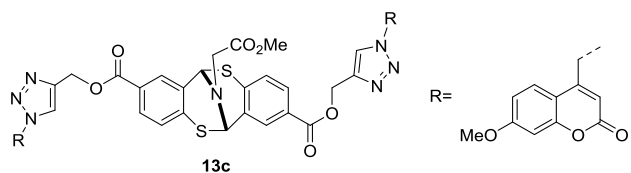

Compound **13c** was prepared according to General Procedure **D**. The obtained residue was purified by silica gel column chromatography ( $\text{CH}_2\text{Cl}_2$ : MeOH= 10: 1) to give **13c** (17.7 mg, 93%) as a white solid.  $R_f$  = 0.55 ( $\text{CH}_2\text{Cl}_2$ : MeOH= 10: 1).  $^1\text{H NMR}$  (400 MHz,  $\text{CDCl}_3$ )  $\delta$  7.84 (d,  $J$  = 1.7 Hz, 2H), 7.79 (s, 2H), 7.62 (dd,  $J$  = 8.3, 1.8 Hz, 2H), 7.49 (d,  $J$  = 8.8 Hz, 2H), 6.98 (d,  $J$  = 8.3 Hz, 1H), 6.82 (dd,  $J$  = 8.8, 2.5 Hz, 2H), 6.78 (d,  $J$  = 2.5 Hz, 1H), 5.84 (s, 1H), 5.65 (s, 2H), 5.62 (s, 1H), 5.41 (q,  $J$  = 12.8 Hz, 2H), 3.84 (s, 3H), 3.80 (s, 1H), 3.72 (s, 2H), 3.49 (d,  $J$  = 17.2 Hz, 1H).  $^{13}\text{C NMR}$  (151 MHz,  $\text{CDCl}_3$ )  $\delta$  169.41, 165.46, 163.24, 160.19, 155.60, 147.83, 136.49, 132.46, 130.41, 128.55, 127.61, 126.13, 124.76, 124.55, 112.91, 111.89, 110.35, 101.34, 61.71, 57.87, 55.83, 55.82, 54.66, 52.25, 50.18. **IR** (thin film):  $\text{cm}^{-1}$  3148, 3093, 2958, 2247, 1710, 1610, 1398, 1285, 1262, 1208, 1148, 1110, 1049, 989, 841, 760, 730. **HRMS** (ESI<sup>+</sup>): calculated for  $\text{C}_{47}\text{H}_{37}\text{N}_7\text{O}_{12}\text{S}_2\text{Na}$   $[\text{M}+\text{Na}]^+$  978.1839, found: 978.1823.

#### Synthesis of **13d**

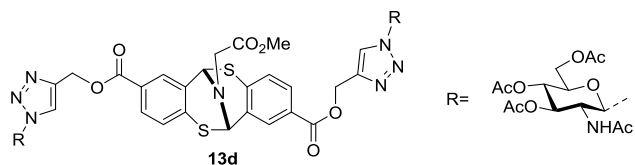

Compound **13d** was prepared according to General Procedure **D**. The obtained residue was purified by silica gel column chromatography (CH<sub>2</sub>Cl<sub>2</sub>: MeOH= 10: 1) to give **13d** (20.2 mg, 82%) as a white solid.  $R_f$  = 0.41 (CH<sub>2</sub>Cl<sub>2</sub>: MeOH= 10: 1). **<sup>1</sup>H NMR** (400 MHz, CDCl<sub>3</sub>)  $\delta$  8.01 (s, 1H), 7.91 (s, 1H), 7.69 (d,  $J$  = 8.4 Hz, 2H), 7.02 (d,  $J$  = 7.6 Hz, 2H), 6.06 (d,  $J$  = 9.3 Hz, 2H), 5.66 (d,  $J$  = 8.4 Hz, 2H), 5.53 – 5.38 (m, 3H), 5.24 (t,  $J$  = 9.4 Hz, 2H), 4.62 – 4.51 (m, 2H), 4.28 (d,  $J$  = 9.7 Hz, 1H), 4.14 (d,  $J$  = 12.2 Hz, 1H), 4.02 (d,  $J$  = 11.8 Hz, 2H), 3.84 (d,  $J$  = 17.1 Hz, 1H), 3.74 (s, 1H), 3.50 (dd,  $J$  = 16.8, 6.0 Hz, 1H), 2.06 (s, 9H), 1.73 (d,  $J$  = 7.8 Hz, 6H). **<sup>13</sup>C NMR** (151 MHz, CDCl<sub>3</sub>)  $\delta$  170.77, 170.76, 170.58, 170.53, 169.48, 169.46, 169.31, 165.47, 143.17, 143.15, 136.52, 136.50, 132.59, 132.54, 130.54, 130.50, 128.59, 127.63, 127.60, 126.24, 126.22, 123.39, 123.33, 85.86, 74.98, 72.17, 67.96, 61.70, 54.75, 53.49, 52.29, 52.27, 22.84, 22.80, 20.68, 20.61, 20.57. **IR** (thin film): cm<sup>-1</sup> 2980, 2853, 2251, 1745, 1716, 1602, 1369, 1229, 1106, 1043, 906, 728, 647. **HRMS** (ESI<sup>+</sup>): calculated for C<sub>53</sub>H<sub>59</sub>N<sub>9</sub>O<sub>22</sub>S<sub>2</sub>Na [M+Na]<sup>+</sup> 1260.3114, found: 1260.3106.

#### Synthesis of **13e**

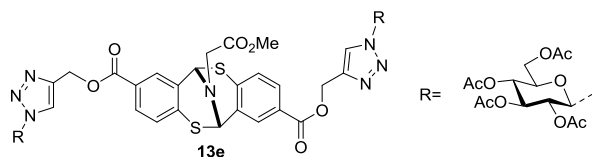

Compound **13e** was prepared according to General Procedure **D**. The obtained residue was purified by silica gel column chromatography (hexane: ethyl acetate= 1: 4) to give **13e** (20.6 mg, 83%) as a white solid.  $R_f$  = 0.6 (hexane: EtOAc= 1: 4). **<sup>1</sup>H NMR** (400 MHz, CDCl<sub>3</sub>)  $\delta$  7.91 (s, 4H), 7.71 (d,  $J$  = 8.3 Hz, 2H), 7.06 (d,  $J$  = 8.3 Hz, 2H), 5.88 (d,  $J$  = 8.5 Hz, 2H), 5.65 (s, 2H), 5.52 – 5.34 (m, 8H), 5.24 (t,  $J$  = 9.2 Hz, 2H), 4.30 (dd,  $J$  = 12.6, 4.9 Hz, 2H), 4.15 (d,  $J$  = 12.4 Hz, 2H), 4.01 (d,  $J$  = 10.2 Hz, 2H), 3.84 (d,  $J$  = 17.1 Hz, 1H), 3.75 (s, 3H), 3.50 (d,  $J$  = 17.3 Hz, 1H), 2.08 (s, 3H), 2.06 (s, 3H), 2.02 (s, 6H), 1.85 (d,  $J$  = 9.0 Hz, 6H). **<sup>13</sup>C NMR** (151 MHz, CDCl<sub>3</sub>)  $\delta$  170.48, 169.90, 169.31, 168.87, 168.84, 165.45, 143.52, 136.46, 132.47, 130.51, 128.67, 128.65, 127.68, 126.31, 126.29, 122.46, 85.76, 75.22, 72.56, 70.27, 67.62, 61.80, 61.45, 57.82, 54.80, 52.30, 20.68, 20.51, 20.48, 20.15, 20.12. **IR** (thin film): cm<sup>-1</sup> 2980, 2889, 2254, 1749, 1717, 1602, 1369, 1216, 1104, 1041, 906, 729. **HRMS** (ESI<sup>+</sup>): calculated for C<sub>53</sub>H<sub>57</sub>N<sub>7</sub>O<sub>24</sub>S<sub>2</sub>Na [M+Na]<sup>+</sup> 1262.2794, found: 1262.2776.

#### Synthesis of **15a**

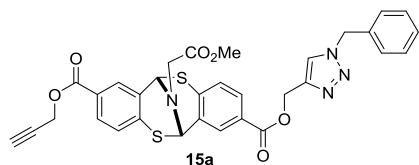

Compound **15a** was prepared according to General Procedure **E**. The obtained residue was purified by silica gel column chromatography (hexane: ethyl acetate= 1.5: 1) to give **15a** (7.2 mg, 58%) as a white solid.  $R_f$  = 0.25 (hexane: EtOAc= 2: 1).  **$^1\text{H NMR}$**  (400 MHz,  $\text{CDCl}_3$ )  $\delta$  7.90 (d,  $J$  = 15.4 Hz, 2H), 7.71 (dd,  $J$  = 17.3, 8.3 Hz, 2H), 7.58 (s, 1H), 7.33 (dd,  $J$  = 36.0, 6.7 Hz, 4H), 7.07 (t,  $J$  = 8.4 Hz, 2H), 5.65 (d,  $J$  = 10.5 Hz, 2H), 5.52 (s, 2H), 5.41 (q,  $J$  = 12.7 Hz, 2H), 4.95 – 4.83 (m, 2H), 3.85 (d,  $J$  = 17.2 Hz, 1H), 3.51 (d,  $J$  = 17.2 Hz, 1H), 2.52 (s, 1H).  **$^{13}\text{C NMR}$**  (151 MHz,  $\text{CDCl}_3$ )  $\delta$  169.39, 165.59, 164.96, 143.13, 136.64, 136.37, 134.29, 132.40, 130.49, 129.18, 128.88, 128.70, 128.19, 127.75, 127.69, 126.44, 126.05, 123.89, 75.14, 61.86, 58.05, 54.82, 54.27, 52.52, 52.33. **IR** (thin film):  $\text{cm}^{-1}$  3283, 2982, 2891, 1747, 1717, 1604, 1373, 1241, 1112, 1047, 906, 726. **HRMS** (ESI+): calculated for  $\text{C}_{32}\text{H}_{27}\text{N}_4\text{O}_6\text{S}_2$   $[\text{M}+\text{H}]^+$  627.1372, found: 627.1354.

#### Synthesis of **15b**

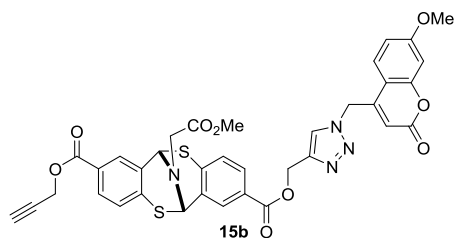

Compound **15b** was prepared according to General Procedure **E**. The obtained residue was purified by silica gel column chromatography (hexane: ethyl acetate= 1: 2) to give **15b** (10.4 mg, 72%) as a white solid.  $R_f$  = 0.31 (hexane: EtOAc= 1: 2).  **$^1\text{H NMR}$**  (400 MHz,  $\text{CDCl}_3$ )  $\delta$  7.91 (d,  $J$  = 12.9 Hz, 2H), 7.77 – 7.66 (m, 1H), 7.51 (d,  $J$  = 9.7 Hz, 1H), 7.08 (dd,  $J$  = 8.3, 5.3 Hz, 2H), 6.91 – 6.83 (m, 1H), 5.91 (s, 1H), 5.66 (d,  $J$  = 6.2 Hz, 2H), 5.44 (q,  $J$  = 12.7 Hz, 1H), 4.96 – 4.81 (m, 2H), 3.87 (s, 2H), 3.83 (s, 1H), 3.76 (s, 1H), 3.52 (d,  $J$  = 17.2 Hz, 1H), 2.51 (t,  $J$  = 2.0 Hz, 1H).  **$^{13}\text{C NMR}$**  (151 MHz,  $\text{CDCl}_3$ )  $\delta$  169.40, 165.59, 164.95, 163.37, 160.18, 155.77, 147.61, 143.90, 136.63, 136.59, 132.50, 132.48, 130.54, 128.71, 127.76, 126.23, 126.06, 124.55, 113.05, 112.19, 110.40, 101.47, 75.14, 61.85, 57.89, 55.86, 54.80, 52.52, 52.35, 50.34, 38.13, 31.91, 31.21. **IR** (thin film):  $\text{cm}^{-1}$  3278, 2841, 1721, 1598, 1521, 1275, 1258, 1137, 1114, 845, 673. **HRMS** (ESI+): calculated for  $\text{C}_{36}\text{H}_{29}\text{N}_4\text{O}_9\text{S}_2$   $[\text{M}+\text{H}]^+$  725.1376, found: 725.1364.

### Synthesis of **15c**

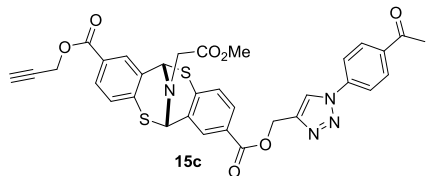

Compound **15c** was prepared according to General Procedure **E**. The obtained residue was purified by silica gel column chromatography (hexane: ethyl acetate= 1: 1) to give **15c** (8.2 mg, 63%) as a white solid.  $R_f = 0.38$  (hexane: EtOAc= 1: 1).  $^1\text{H NMR}$  (400 MHz,  $\text{CDCl}_3$ )  $\delta$  8.20 (s, 1H), 8.13 (d,  $J = 8.7$  Hz, 2H), 7.93 (s, 2H), 7.88 (d,  $J = 8.7$  Hz, 2H), 7.74 (d,  $J = 8.4$  Hz, 2H), 7.09 (dd,  $J = 8.3, 2.7$  Hz, 2H), 5.66 (s, 2H), 5.53 (q,  $J = 12.7$  Hz, 2H), 4.97 – 4.81 (m, 2H), 3.85 (d,  $J = 17.2$  Hz, 1H), 3.76 (s, 3H), 3.52 (d,  $J = 17.2$  Hz, 1H), 2.66 (s, 3H), 2.51 (t,  $J = 2.4$  Hz, 1H).  $^{13}\text{C NMR}$  (151 MHz,  $\text{CDCl}_3$ )  $\delta$  196.52, 169.39, 165.69, 164.94, 143.93, 139.87, 137.03, 136.65, 136.60, 132.52, 132.48, 130.54, 130.10, 128.70, 127.76, 126.25, 126.09, 122.23, 120.19, 77.57, 75.15, 61.87, 57.87, 54.80, 52.53, 52.34, 26.68. **IR** (thin film):  $\text{cm}^{-1}$  3281, 2951, 2857, 1718, 1687, 1603, 1442, 1261, 1114, 1039, 961, 731. **HRMS** (ESI<sup>+</sup>): calculated for  $\text{C}_{33}\text{H}_{27}\text{N}_4\text{O}_7\text{S}_2$   $[\text{M}+\text{H}]^+$  655.1321, found: 655.1309.

### Synthesis of **15d**

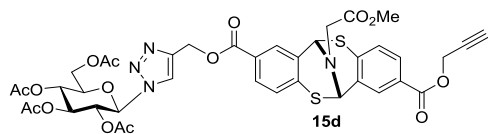

Compound **15d** was prepared according to General Procedure **E**. The obtained residue was purified by silica gel column chromatography (hexane: ethyl acetate= 1: 1.5) to give **15d** (12.9 mg, 74%) as a white solid.  $R_f = 0.41$  (hexane: EtOAc= 1: 1.5).  $^1\text{H NMR}$  (400 MHz,  $\text{CDCl}_3$ )  $\delta$  7.92 (s, 3H), 7.72 (t,  $J = 6.6$  Hz, 2H), 7.08 (d,  $J = 8.3$  Hz, 2H), 5.88 (d,  $J = 8.1$  Hz, 1H), 5.66 (d,  $J = 5.2$  Hz, 2H), 5.51 – 5.36 (m, 4H), 5.24 (t,  $J = 9.1$  Hz, 1H), 4.95 – 4.81 (m, 2H), 4.30 (dd,  $J = 12.8, 4.8$  Hz, 1H), 4.15 (d,  $J = 12.9$  Hz, 1H), 4.01 (d,  $J = 10.3$  Hz, 1H), 3.85 (d,  $J = 17.4$  Hz, 1H), 3.52 (d,  $J = 17.3$  Hz, 1H), 2.51 (s, 1H), 2.08 (s, 3H), 2.06 (s, 3H), 2.02 (s, 3H), 1.85 (d,  $J = 9.8$  Hz, 3H).  $^{13}\text{C NMR}$  (151 MHz,  $\text{CDCl}_3$ )  $\delta$  170.47, 169.89, 169.37, 169.30, 168.83, 165.44, 164.93, 143.52, 136.62, 136.45, 132.52, 132.43, 130.52, 128.68, 127.71, 126.33, 126.03, 122.40, 85.75, 77.57, 75.21, 75.13, 72.56, 70.27, 67.62, 61.82, 61.46, 54.79, 52.50, 52.32, 20.68, 20.50, 20.48, 20.15, 20.11. **IR** (thin film):  $\text{cm}^{-1}$  3285, 2955, 2926, 1713, 1602, 1559, 1370, 1260, 1210, 1106, 839, 760. **HRMS** (ESI<sup>+</sup>): calculated for  $\text{C}_{39}\text{H}_{38}\text{N}_4\text{O}_{15}\text{S}_2\text{Na}$   $[\text{M}+\text{Na}]^+$  889.1673, found: 889.1655.

### Synthesis of **15e**

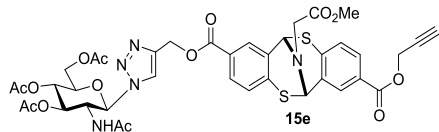

Compound **15e** was prepared according to General Procedure **E**. The obtained residue was purified by silica gel column chromatography (CH<sub>2</sub>Cl<sub>2</sub>: MeOH= 15: 1) to give **15e** (13.3 mg, 77%) as a white solid. R<sub>f</sub>= 0.54 (CH<sub>2</sub>Cl<sub>2</sub>: MeOH= 15: 1). **<sup>1</sup>H NMR** (400 MHz, CDCl<sub>3</sub>) δ 7.99 (s, 1H), 7.93 (s, 2H), 7.73 (d, *J* = 8.2 Hz, 2H), 7.08 (d, *J* = 8.2 Hz, 2H), 6.03 (d, *J* = 10.2 Hz, 1H), 5.90 (s, 1H), 5.68 (s, 2H), 5.52 – 5.36 (m, 3H), 5.24 (t, *J* = 9.7 Hz, 1H), 4.97 – 4.81 (m, 2H), 4.63 – 4.49 (m, 1H), 4.28 (d, *J* = 12.5 Hz, 1H), 4.14 (d, *J* = 12.1 Hz, 1H), 3.99 (s, 1H), 3.85 (d, *J* = 17.9 Hz, 1H), 3.76 (s, 3H), 3.52 (d, *J* = 17.4 Hz, 1H), 2.51 (s, 1H), 2.07 (s, 9H), 1.75 (d, *J* = 12.9 Hz, 3H). **<sup>13</sup>C NMR** (151 MHz, CDCl<sub>3</sub>) δ 170.84, 170.57, 169.42, 169.26, 165.43, 164.98, 143.24, 136.69, 136.43, 132.46, 130.56, 128.69, 127.71, 126.01, 85.97, 77.59, 75.14, 72.13, 67.79, 61.85, 61.78, 61.64, 54.81, 53.64, 52.52, 52.33, 22.86, 20.71, 20.59, 20.56. **IR** (thin film): cm<sup>-1</sup> 3283, 2980, 2926, 2118, 1745, 1717, 1601, 1370, 1230, 1108, 1043, 834, 761. **HRMS** (ESI<sup>+</sup>): calculated for C<sub>39</sub>H<sub>39</sub>N<sub>5</sub>O<sub>14</sub>S<sub>2</sub>Na [M+Na]<sup>+</sup> 888.1833, found: 888.1830.

### Synthesis of **15f**

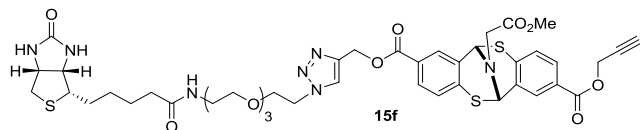

Compound **15f** was prepared according to General Procedure **E**. The obtained residue was purified by preparative thin layer chromatography (CH<sub>2</sub>Cl<sub>2</sub>: MeOH= 10: 1) to give **15f** (11.6 mg, 62%) as a white solid (containing 20% inseparable biotin-PEG3-azide). R<sub>f</sub>= 0.35 (CH<sub>2</sub>Cl<sub>2</sub>: MeOH= 10: 1). **<sup>1</sup>H NMR** (400 MHz, CDCl<sub>3</sub>) δ 7.92 (d, *J* = 4.0 Hz, 2H), 7.89 (s, 1H), 7.72 (t, *J* = 8.8 Hz, 2H), 7.08 (dd, *J* = 8.2, 3.9 Hz, 2H), 6.53 (t, *J* = 5.0 Hz, 1H), 5.83 (s, 1H), 5.68 (d, *J* = 6.5 Hz, 2H), 5.44 (q, *J* = 12.7 Hz, 2H), 5.00 (s, 1H), 4.95 – 4.82 (m, 2H), 4.56 (t, *J* = 4.9 Hz, 2H), 4.50 – 4.45 (m, 1H), 4.30 (s, 1H), 3.90 (d, *J* = 4.9 Hz, 2H), 3.84 (s, 1H), 3.76 (s, 3H), 3.68 – 3.61 (m, 6H), 3.56 – 3.51 (m, 6H), 3.42 (dd, *J* = 9.9, 4.9 Hz, 3H), 3.16 – 3.11 (m, 1H), 2.91 – 2.86 (m, 1H), 2.73 (d, *J* = 8.2 Hz, 1H), 2.52 (s, 1H), 2.19 (t, *J* = 4.0 Hz, 2H), 1.41 (m, 2H), 1.30 (m, 3H). **IR** (thin film): cm<sup>-1</sup> 3283, 2924, 2866, 2245, 1713, 1697, 1598, 1452, 1440, 1287, 1242, 1179, 1105, 1025, 910, 761, 729. **HRMS** (ESI<sup>+</sup>): calculated for C<sub>43</sub>H<sub>52</sub>N<sub>7</sub>O<sub>11</sub>S<sub>3</sub> [M+H]<sup>+</sup> 938.2887, found: 938.2908.

## Synthesis of **15g**

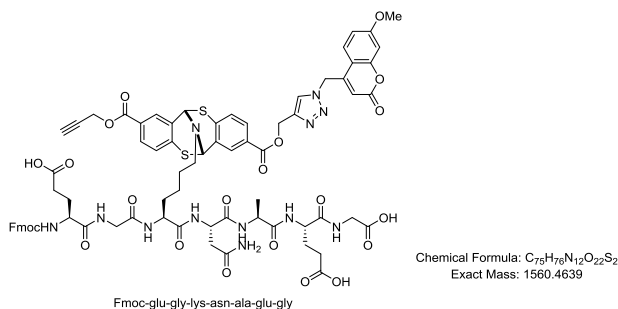

Peptide **15g** was prepared according to General Procedure **F**. Purification of the crude using preparative HPLC (40 to 98% solvent B over 25 min, Higgins Analytical Proto 200 10  $\mu$ m 250  $\times$  20 nm C18 column) afforded the desired modified peptide **15g** as a white solid after lyophilization (3.8 mg, 62%). Analytical HPLC:  $t_R$  = 8.8 min (55 to 98% solvent B over 12 min, Higgins Analytical Proto 200 10  $\mu$ m 250  $\times$  4.6 nm C18 column); HRMS (ESI<sup>+</sup>): calculated for  $C_{75}H_{77}N_{12}O_{22}S_2$  [M+H]<sup>+</sup> 1561.4717, found: 1561.4739.

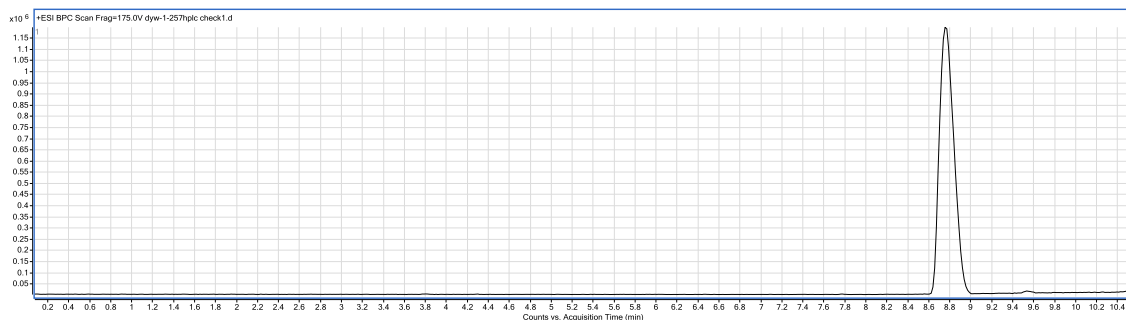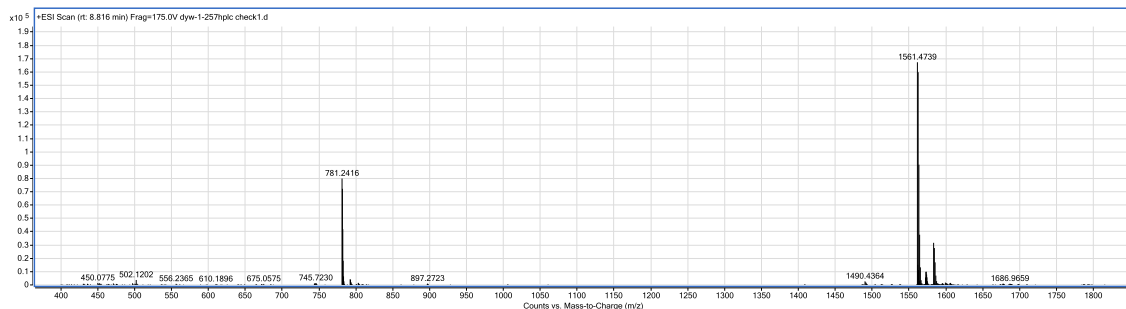

## Synthesis of **15h**

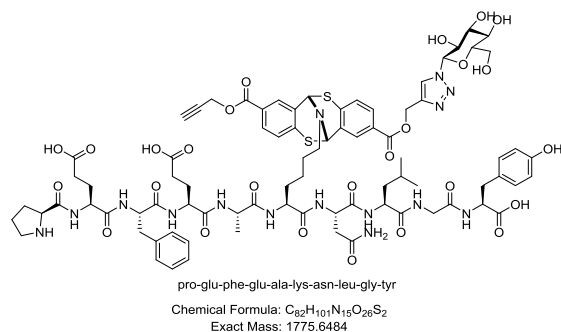

Peptide **15h** was prepared according to General Procedure **F**. Purification of the crude using preparative HPLC (30 to 85% solvent B over 25 min, Higgins Analytical Proto 200 10  $\mu$ m 250  $\times$  20 nm C18 column) afforded the desired modified peptide **15h** as a white solid after lyophilization (4.6 mg, 65%). Analytical HPLC:  $t_R$  = 7.7 min (35 to 95% solvent B over 10 min, Higgins Analytical Proto 200 10  $\mu$ m 250  $\times$  4.6 nm C18 column); HRMS (ESI<sup>+</sup>): calculated for C<sub>82</sub>H<sub>102</sub>N<sub>15</sub>O<sub>26</sub>S<sub>2</sub> [M+H]<sup>+</sup> 1776.6562, found: 1776.6596; C<sub>82</sub>H<sub>103</sub>N<sub>15</sub>O<sub>26</sub>S<sub>2</sub> [M+2H]<sup>2+</sup> 888.8320, found: 888.8342.

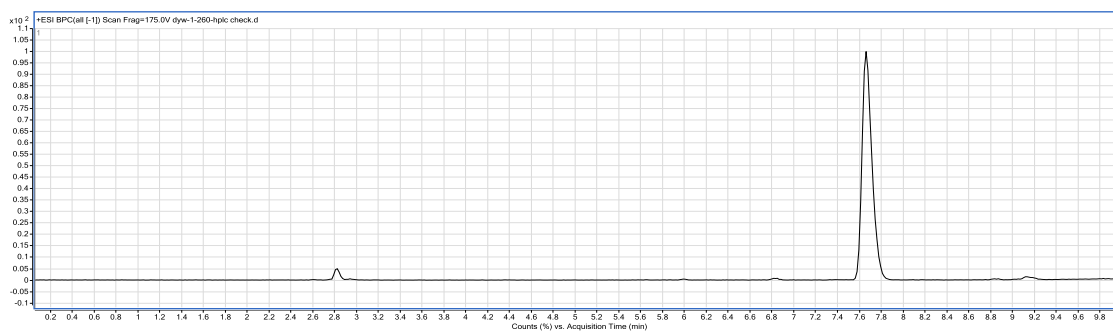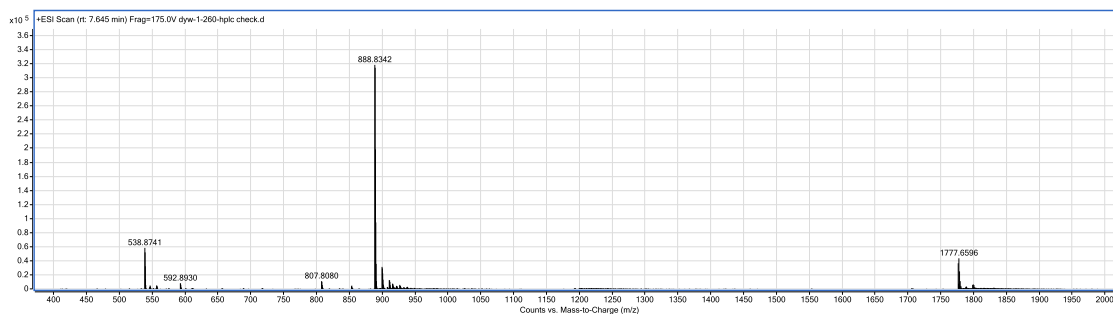

### Synthesis of **15i**

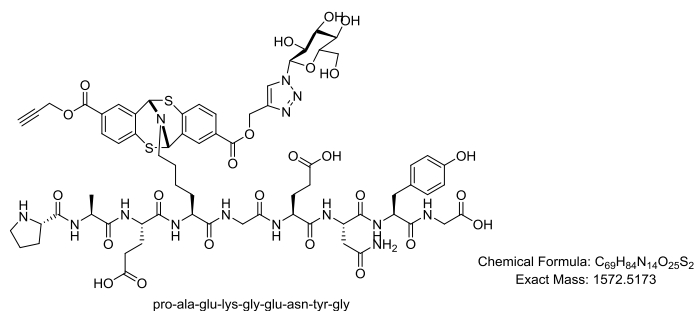

Peptide **15i** was prepared according to General Procedure F. Purification of the crude using preparative HPLC (20 to 80% solvent B over 25 min, Higgins Analytical Proto 200 10  $\mu$ m 250  $\times$  20 nm C18 column) afforded the desired modified peptide **15i** as a white solid after lyophilization (3.9 mg, 61%). Analytical HPLC:  $t_R$  = 7.9 min (35 to 95% solvent B over 10 min, Higgins Analytical Proto 200 10  $\mu$ m 250  $\times$  4.6 nm C18 column); HRMS (ESI+): calculated for  $C_{69}H_{85}N_{14}O_{25}S_2$   $[M+H]^+$  1573.5252, found: 1573.5225.

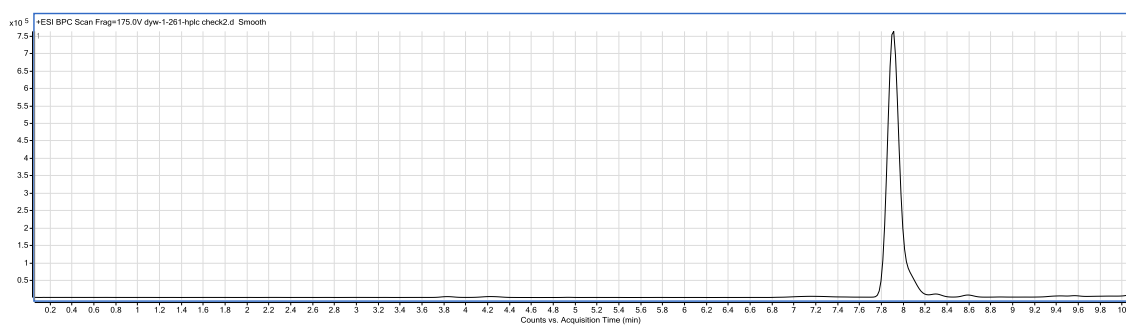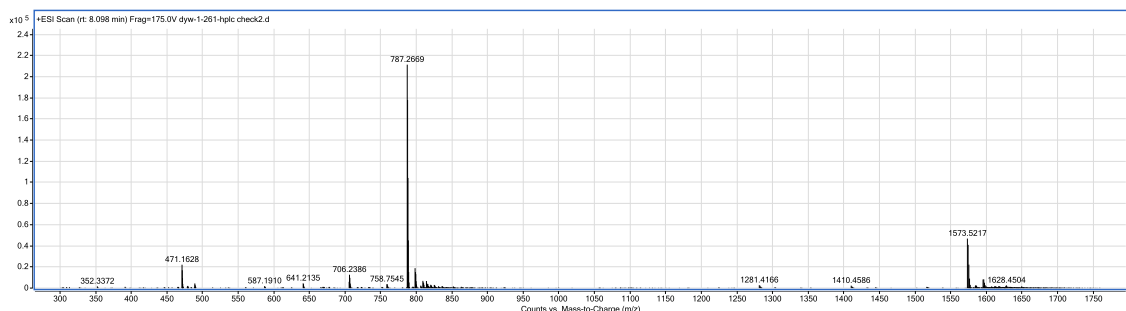

### Synthesis of **15j**

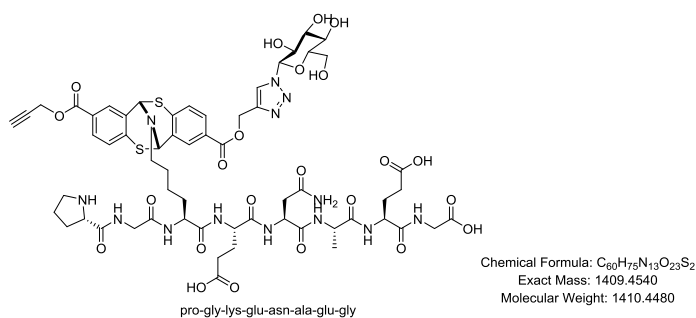

Peptide **15j** was prepared according to General Procedure F. Purification of the crude using preparative



HPLC (20 to 80% solvent B over 25 min, Higgins Analytical Proto 200 10  $\mu$ m 250  $\times$  20 nm C18 column) afforded the desired modified peptide **15j** as a white solid after lyophilization (3.8 mg, 68%). Analytical HPLC:  $t_R$  = 7.9 min (35 to 95% solvent B over 11 min, Higgins Analytical Proto 200 10  $\mu$ m 250  $\times$  4.6 nm C18 column); HRMS (ESI+): calculated for  $C_{60}H_{76}N_{13}O_{23}S_2$   $[M+H]^+$  1410.4618, found: 1410.4585.

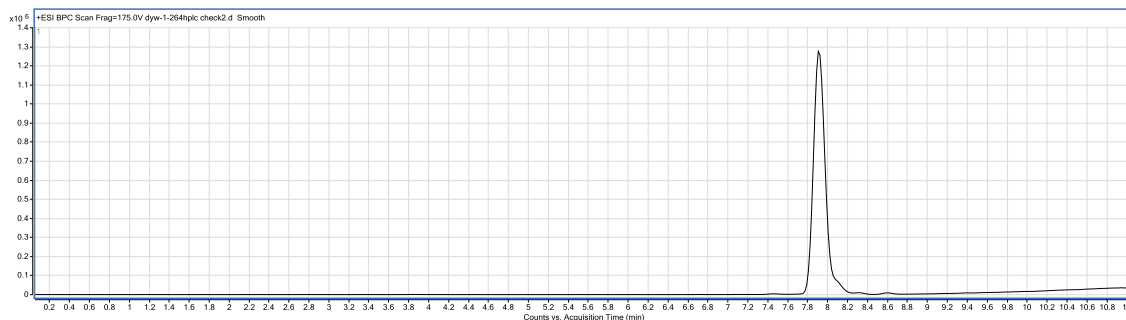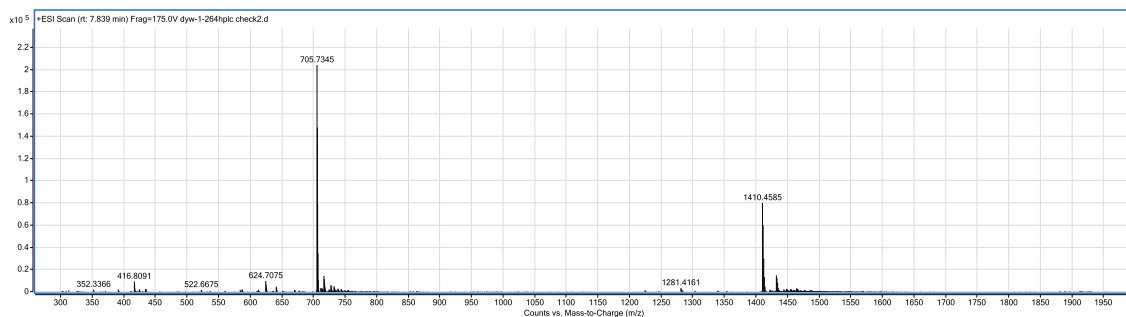

### Synthesis of **16a**

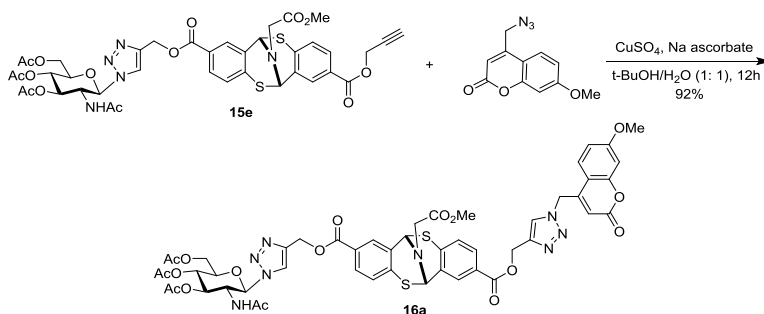

Compound **15e** (5 mg, 0.00578 mmol) and 4-(azidomethyl)-7-methoxy-2H-chromen-2-one (2.7 mg, 0.0115 mmol) was dissolved in 1 mL of tert-butanol/water (1: 1). After degassing for 20 min, 6  $\mu$ L of  $CuSO_4$  (0.1 M in deionized water) was added, followed by the addition of 6  $\mu$ L of sodium ascorbate (0.2 M in deionized water) and 6  $\mu$ L of TBTA (0.2 M in *tert*-butanol). The reaction mixture was stirred at room temperature for 12 h. Then the mixture was diluted with ethyl acetate (10 mL), washed with water and brine (6 mL $\times$ 2), dried over  $Na_2SO_4$ . The solvent was removed in vacuo. The obtained residue was purified by silica gel column chromatography ( $CH_2Cl_2$ : MeOH= 10: 1) to give **16a** (5.8 mg, 92%) as a white solid.  $R_f$  = 0.52 ( $CH_2Cl_2$ : MeOH= 10: 1).  $^1H$  NMR (400 MHz,  $CDCl_3$ )  $\delta$  7.99 (s, 1H), 7.90 (d,  $J$  = 14.3 Hz, 2H), 7.74 (s,

1H), 7.69 (t,  $J = 9.2$  Hz, 2H), 7.51 (d,  $J = 9.5$  Hz, 1H), 7.05 (dd,  $J = 8.3, 3.7$  Hz, 2H), 6.90 – 6.83 (m, 2H), 6.02 (d,  $J = 9.9$  Hz, 1H), 5.91 (s, 1H), 5.83 (dd,  $J = 9.1, 3.3$  Hz, 1H), 5.66 (d,  $J = 5.6$  Hz, 4H), 5.24 (t,  $J = 10.3$  Hz, 1H), 4.56 (dd,  $J = 19.8, 10.1$  Hz, 1H), 4.29 (dd,  $J = 12.7, 4.8$  Hz, 1H), 4.14 (d,  $J = 12.7$  Hz, 1H), 3.99 (dd,  $J = 8.9, 3.7$  Hz, 1H), 3.87 (s, 3H), 3.82 (s, 1H), 3.75 (s, 3H), 3.51 (dd,  $J = 17.2, 2.3$  Hz, 1H), 2.09 – 2.04 (m, 10H), 1.75 (d,  $J = 10.8$  Hz, 3H).  $^{13}\text{C NMR}$  (151 MHz,  $\text{CDCl}_3$ )  $\delta$  170.79, 170.55, 169.42, 169.26, 165.60, 165.39, 163.36, 160.21, 155.75, 147.67, 143.89, 132.46, 130.54, 130.49, 128.66, 128.63, 127.68, 126.16, 124.61, 124.57, 113.04, 112.17, 110.41, 101.46, 85.93, 75.08, 72.13, 67.81, 61.81, 61.64, 57.88, 55.86, 54.78, 53.64, 52.30, 50.32, 22.91, 22.87, 20.71, 20.59, 20.57. **IR** (thin film):  $\text{cm}^{-1}$  2927, 2857, 2248, 2118, 1742, 1717, 1611, 1605, 1557, 1373, 1233, 1105, 1045, 910, 761, 732. **HRMS** (ESI+): calculated for  $\text{C}_{50}\text{H}_{49}\text{N}_8\text{O}_{17}\text{S}_2$   $[\text{M}+\text{H}]^+$  1097.2657, found: 1097.2635.

### Synthesis of **16b**

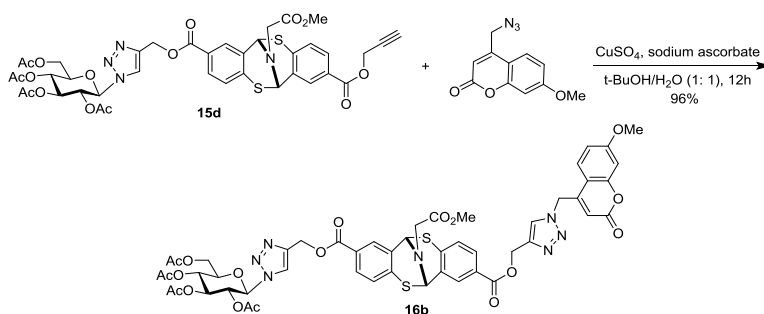

Compound **15d** (10 mg, 0.0115 mmol) and 4-(azidomethyl)-7-methoxy-2H-chromen-2-one (5.9 mg, 0.0254 mmol) was dissolved in 1.5 mL of tert-butanol/water (1: 1). After degassing for 20 min, 10  $\mu\text{L}$  of  $\text{CuSO}_4$  (0.1 M in deionized water) was added, followed by the addition 10  $\mu\text{L}$  of sodium ascorbate (0.2 M in deionized water) and 10  $\mu\text{L}$  of TBTA (0.1 M in *tert*-butanol). The reaction mixture was stirred at room temperature for 12 h. Then the mixture was diluted with ethyl acetate (15 mL), washed with water and brine (8 mL $\times$ 2), dried over  $\text{Na}_2\text{SO}_4$ . The solvent was removed in vacuo. The obtained residue was purified by silica gel column chromatography ( $\text{CH}_2\text{Cl}_2$ : MeOH= 15: 1) to give **16b** (12.1 mg, 96%) as a white solid.  $R_f = 0.46$  ( $\text{CH}_2\text{Cl}_2$ : MeOH= 15: 1).  $^1\text{H NMR}$  (400 MHz,  $\text{CDCl}_3$ )  $\delta$  7.90 (d,  $J = 14.2$  Hz, 3H), 7.74 (s, 1H), 7.68 (d,  $J = 8.9$  Hz, 2H), 7.50 (d,  $J = 8.3$  Hz, 1H), 7.05 (s, 2H), 6.85 (s, 2H), 5.88 (d,  $J = 12.0$  Hz, 2H), 5.65 (d,  $J = 7.7$  Hz, 4H), 5.50 – 5.38 (m, 6H), 5.24 (t,  $J = 8.9$  Hz, 1H), 4.30 (d,  $J = 12.6$  Hz, 1H), 4.15 (d,  $J = 14.5$  Hz, 1H), 4.01 (d,  $J = 10.7$  Hz, 1H), 3.87 (s, 3H), 3.82 (s, 1H), 3.75 (s, 3H), 3.50 (d,  $J = 17.7$  Hz, 1H), 2.07 (s, 3H), 2.02 (s, 3H), 1.85 (d,  $J = 9.1$  Hz, 3H).  $^{13}\text{C NMR}$  (151 MHz,  $\text{CDCl}_3$ )  $\delta$  170.49, 169.90, 169.71, 169.39, 169.31, 165.58, 165.44, 163.36, 160.17, 155.76, 147.63, 132.51, 130.51, 128.66, 127.71, 126.30, 126.21, 124.60, 124.55, 113.03, 112.19, 110.40, 101.46, 85.78, 75.23, 72.57, 70.28, 67.63, 61.82, 61.47,

57.89, 55.86, 54.79, 52.31, 50.33, 20.69, 20.51, 20.49, 20.13. **IR** (thin film):  $\text{cm}^{-1}$  2955, 2927, 2855, 1748, 1717, 1612, 1375, 1286, 1262, 1224, 1108, 1044, 914, 760, 732. **HRMS** (ESI<sup>+</sup>): calculated for  $\text{C}_{50}\text{H}_{48}\text{N}_7\text{O}_{18}\text{S}_2$   $[\text{M}+\text{H}]^+$  1098.2497, found: 1098.2484.

### Synthesis of **16c**

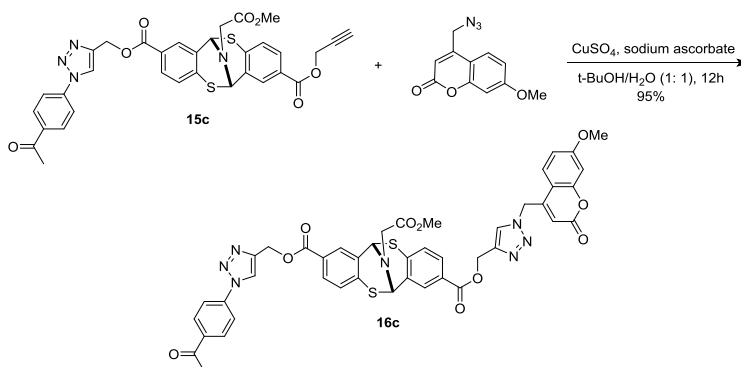

Compound **15c** (5 mg, 0.00764 mmol) and 4-(azidomethyl)-7-methoxy-2H-chromen-2-one (3.9 mg, 0.0168 mmol) was dissolved in 1 mL of *tert*-butanol/water (1: 1). After degassing for 20 min, 8  $\mu\text{L}$  of  $\text{CuSO}_4$  (0.1 M in deionized water) was added, followed by the addition 8  $\mu\text{L}$  of sodium ascorbate (0.2 M in deionized water) and 8  $\mu\text{L}$  of TBTA (0.1 M in *tert*-butanol). The reaction mixture was stirred at room temperature for 12h. Then the mixture was diluted with ethyl acetate (10 mL), washed with water and brine (6 mL $\times$ 2), dried over  $\text{Na}_2\text{SO}_4$ . The solvent was removed in vacuo. The obtained residue was purified by silica gel column chromatography (hexane: ethyl acetate= 1: 4) to give **16c** (6.5 mg, 95%) as a white solid.  $R_f$  = 0.58 (hexane: EtOAc= 1: 4). **<sup>1</sup>H NMR** (400 MHz,  $\text{CDCl}_3$ )  $\delta$  8.20 (s, 1H), 8.12 (d,  $J$  = 8.4 Hz, 2H), 7.91 (d,  $J$  = 1.7 Hz, 1H), 7.88 (dd,  $J$  = 5.2, 3.2 Hz, 3H), 7.77 – 7.64 (m, 3H), 7.51 (d,  $J$  = 9.3 Hz, 1H), 7.06 (t,  $J$  = 8.2 Hz, 2H), 6.89 – 6.83 (m, 2H), 5.90 (s, 1H), 5.66 (s, 2H), 5.64 (d,  $J$  = 6.4 Hz, 2H), 5.53 (q,  $J$  = 12.8 Hz, 2H), 5.43 (q,  $J$  = 12.8 Hz, 2H), 3.87 (s, 3H), 3.84 (d,  $J$  = 17.2 Hz, 1H), 3.75 (s, 3H), 3.50 (d,  $J$  = 17.2 Hz, 1H), 2.66 (s, 3H). **<sup>13</sup>C NMR** (151 MHz,  $\text{CDCl}_3$ )  $\delta$  196.52, 169.39, 165.66, 165.56, 163.36, 160.17, 155.75, 147.64, 143.92, 143.87, 139.86, 137.02, 136.63, 136.54, 132.52, 132.45, 130.51, 130.49, 130.09, 128.67, 127.74, 127.71, 126.24, 126.22, 124.59, 124.54, 122.22, 120.18, 113.04, 112.15, 110.39, 101.46, 61.83, 57.86, 55.86, 54.77, 52.33, 50.32, 26.68. **IR** (thin film):  $\text{cm}^{-1}$  3143, 2955, 2927, 2854, 1717, 1688, 1605, 1557, 1286, 1261, 1178, 1112, 1048, 911, 840, 761, 732. **HRMS** (ESI<sup>+</sup>): calculated for  $\text{C}_{44}\text{H}_{36}\text{N}_7\text{O}_{10}\text{S}_2$   $[\text{M}+\text{H}]^+$  886.1965, found: 886.1983.

### Synthesis of **16d**

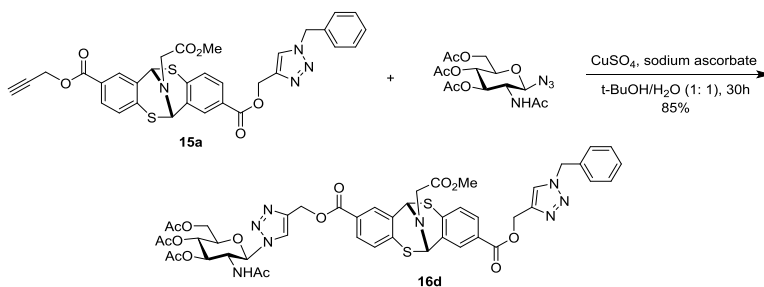

Compound **15a** (4 mg, 0.00639 mmol) and 2-acetamido-3,4,6-tri-O-acetyl-2-deoxy-β-D-glucopyranosyl azide (4.8 mg, 0.0128 mmol) was dissolved in 1 mL of tert-butanol/water (1: 1). After degassing for 20 min, 6 μL of CuSO<sub>4</sub> (0.1 M in deionized water) was added, followed by the addition 6 μL of sodium ascorbate (0.2 M in deionized water) and 6 μL of TBTA (0.1 M in *tert*-butanol). The reaction mixture was stirred at room temperature for 30 h. Then the mixture was diluted with ethyl acetate (10 mL), washed with water and brine (6 mL×2), dried over Na<sub>2</sub>SO<sub>4</sub>. The solvent was removed in vacuo. The obtained residue was purified by silica gel column chromatography (hexane: ethyl acetate= 1: 3) to give **16d** (5.4 mg, 85%) as a white solid. *R<sub>f</sub>* = 0.27 (hexane: EtOAc= 1: 2). <sup>1</sup>H NMR (400 MHz, CDCl<sub>3</sub>) δ 7.98 (d, *J* = 1.7 Hz, 1H), 7.92 (s, 1H), 7.87 (d, *J* = 1.4 Hz, 1H), 7.75 – 7.65 (m, 2H), 7.58 (s, 1H), 7.37 (d, *J* = 7.0 Hz, 2H), 7.32 – 7.26 (m, 2H), 7.09 – 7.01 (m, 2H), 6.04 – 5.96 (m, 1H), 5.74 (dd, *J* = 9.0, 5.0 Hz, 1H), 5.65 (d, *J* = 3.7 Hz, 1H), 5.63 (s, 1H), 5.52 (s, 2H), 5.46 – 5.38 (m, 4H), 5.24 (t, *J* = 9.9 Hz, 1H), 5.10 (dd, *J* = 12.5, 6.9 Hz, 1H), 4.55 (dd, *J* = 19.5, 10.1 Hz, 1H), 4.30 – 4.23 (m, 1H), 4.19 – 4.12 (m, 1H), 3.99 (d, *J* = 10.2 Hz, 1H), 3.84 (d, *J* = 17.2 Hz, 1H), 3.75 (s, 3H), 3.50 (dd, *J* = 17.1, 1.9 Hz, 1H), 2.09 – 2.03 (m, 10H), 1.75 (d, *J* = 12.6 Hz, 3H). <sup>13</sup>C NMR (151 MHz, CDCl<sub>3</sub>) δ 170.85, 170.55, 170.33, 169.40, 169.24, 165.60, 165.41, 143.23, 143.13, 136.41, 134.29, 132.44, 130.54, 130.47, 129.18, 128.88, 128.65, 128.18, 127.68, 126.37, 123.89, 86.00, 75.15, 74.02, 72.11, 67.73, 61.80, 61.62, 58.03, 54.81, 54.26, 53.68, 52.31, 22.88, 20.71, 20.62, 20.58, 20.56. IR (thin film): cm<sup>-1</sup> 2955, 2927, 2118, 1748, 1716, 1602, 1372, 1260, 1235, 1110, 1045, 915, 761, 732. HRMS (ESI<sup>+</sup>): calculated for C<sub>46</sub>H<sub>47</sub>N<sub>8</sub>O<sub>14</sub>S<sub>2</sub> [M+H]<sup>+</sup> 999.2653, found: 999.2661.

## 4. Conjugation with recombinant human insulin

### 4.1 Conjugation with human insulin

Human insulin (5817.4 Da), mono-modified human insulin (6221.5 Da)

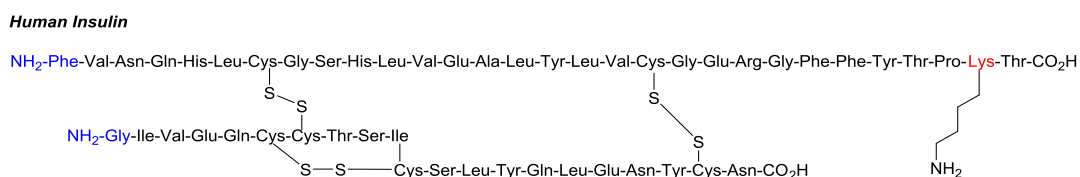

To a solution of human insulin (1.0 mg, 0.000172 mmol) in 80  $\mu\text{L}$  of PBS buffer (pH= 5.5) was added prop-2-yn-1-yl 3-formyl-4-mercaptobenzoate **1** (0.34 mg, 0.0012 mmol) in 20  $\mu\text{L}$  of tetrahydrofuran. The final concentration of human insulin is 1.72 mM, the mixture was stirred at room temperature for 4 h, monitored the reaction by LC-MS. The ratio of insulin/modified insulin is 14: 86 by LC-MS. Two isomeric peaks were detected due to the modification occurred at the *N*-termini of either A chain or B chain. The specific site of the modification was confirmed by LC-MS/MS protocol.

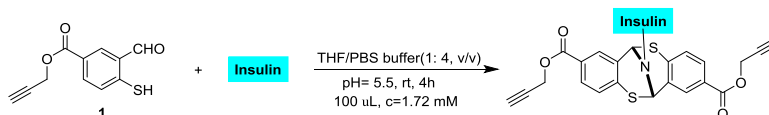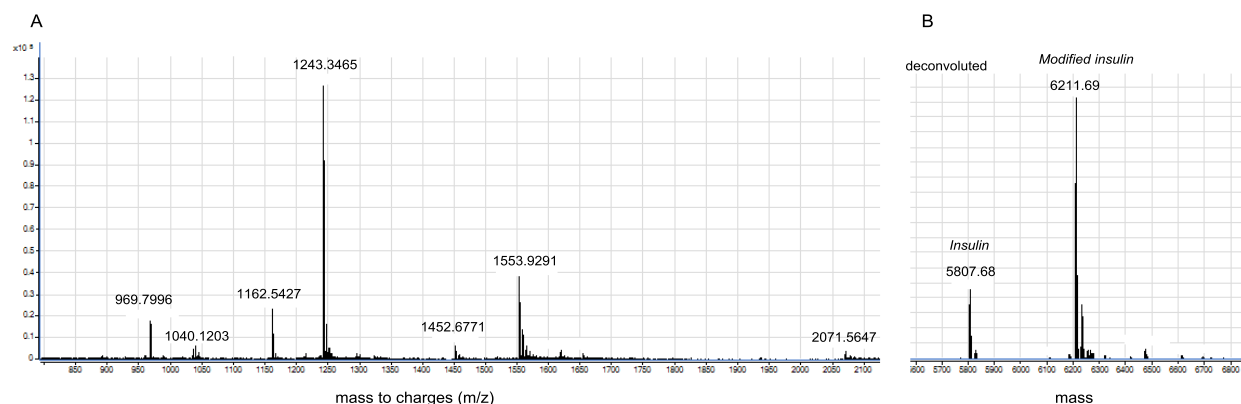

ESI-MS spectrum of the crude modification reaction of human insulin with **1**. (A) Raw spectrum. (B) Spectrum after deconvolution. Insulin: ( $\text{C}_{257}\text{H}_{383}\text{N}_{65}\text{O}_{77}\text{S}_6$ ) 5807.63 calculated, 5807.68 found; modified insulin: 6211.65(5807.63+404.02) calculated, 6211.69 found.

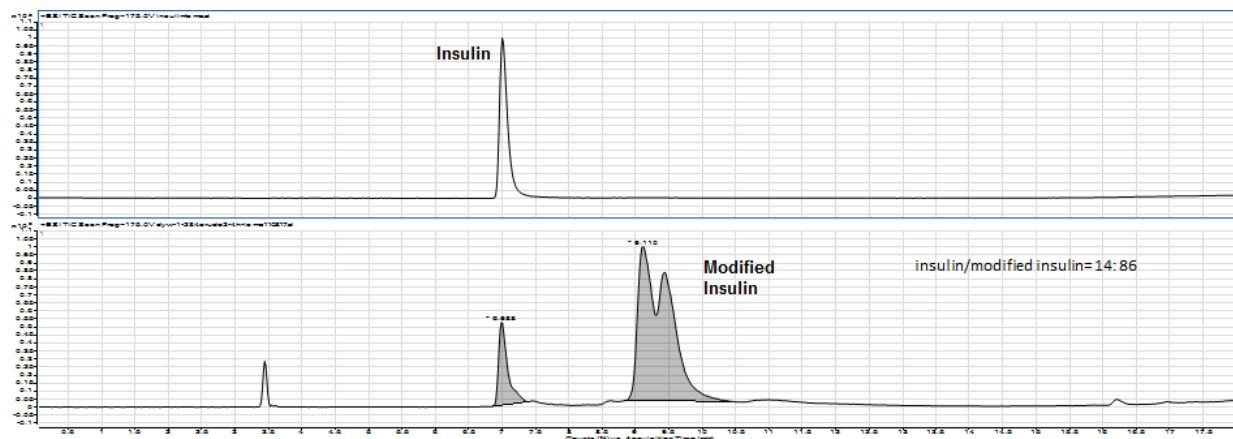

HPLC trace of pure human insulin sample(top) and the crude reaction mixture of human insulin with **1** (down). HPLC condition: 20 to 70% solvent B over 17 min, flow rate 0.5 mL/min, Higgins Analytical Proto 200 10  $\mu\text{m}$  250  $\times$  4.6 nm C18 column.

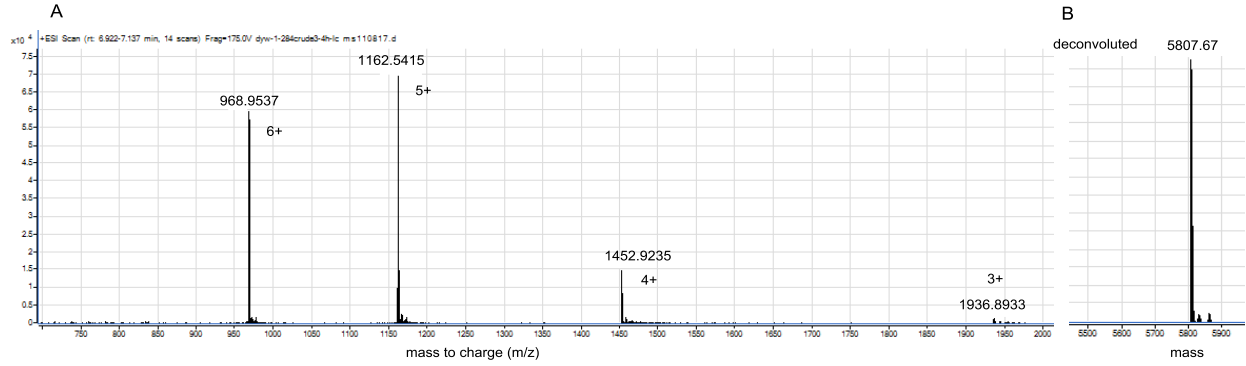

ESI-MS spectra of insulin. (A) Raw spectrum. (B) Spectrum after deconvolution. Insulin: (C<sub>257</sub>H<sub>383</sub>N<sub>65</sub>O<sub>77</sub>S<sub>6</sub>) 5807.63 calculated, 5807.67 found.

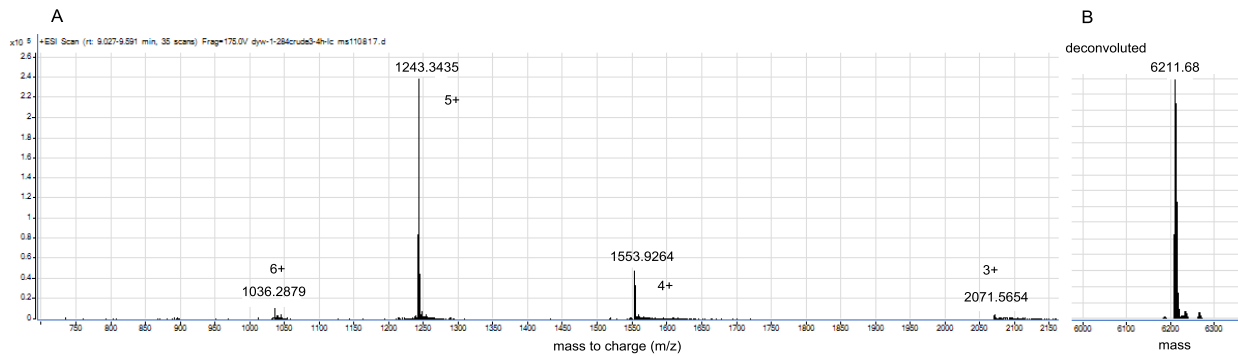

ESI-MS spectrum of modified insulin (+404 Da adduct). (A) Raw spectrum. (B) Spectrum after deconvolution. modified insulin: 6211.65(5807.63+404.02) calculated, 6211.69 found.

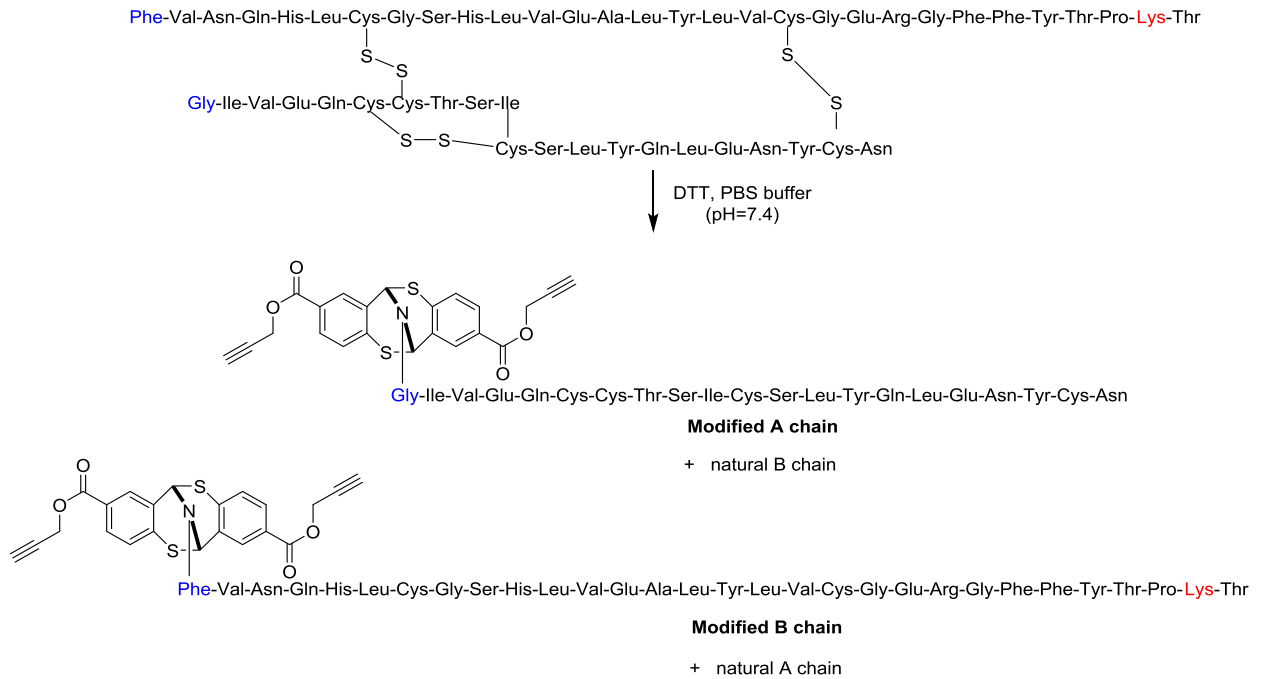

After adding DTT to cleavage disulfide bonds, modified A chain (Mr(calc)= 2786.0177):

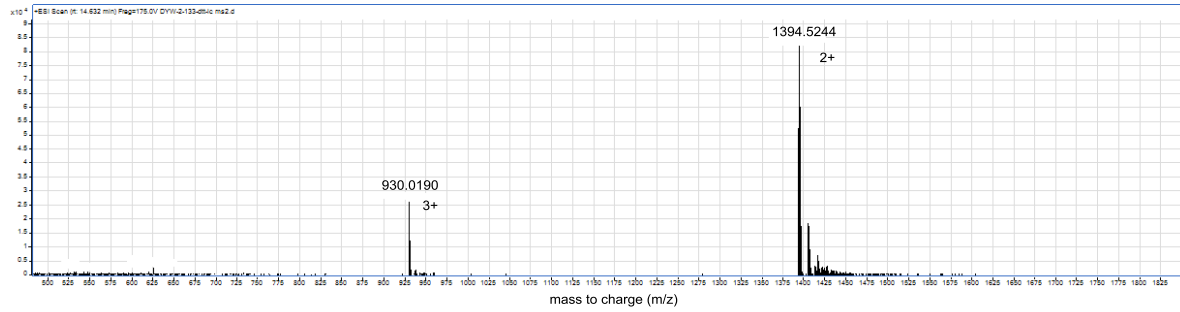

After adding DTT to cleave disulfide bonds, modified B chain ( $M_r(\text{calc})= 3831.7023$ ):

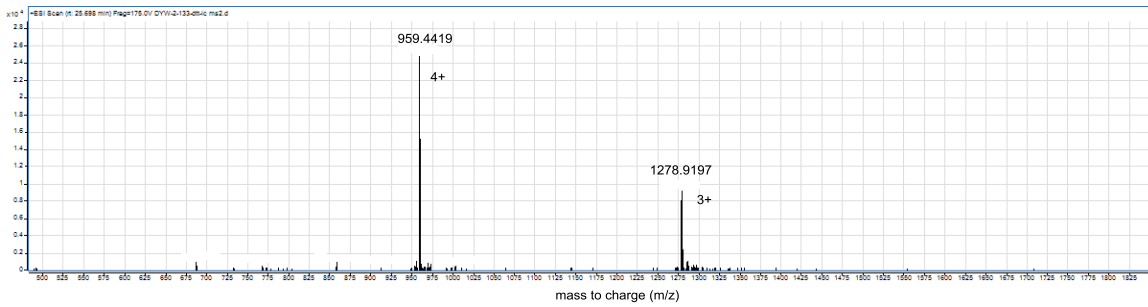

MS/MS spectrum of modified A chain:

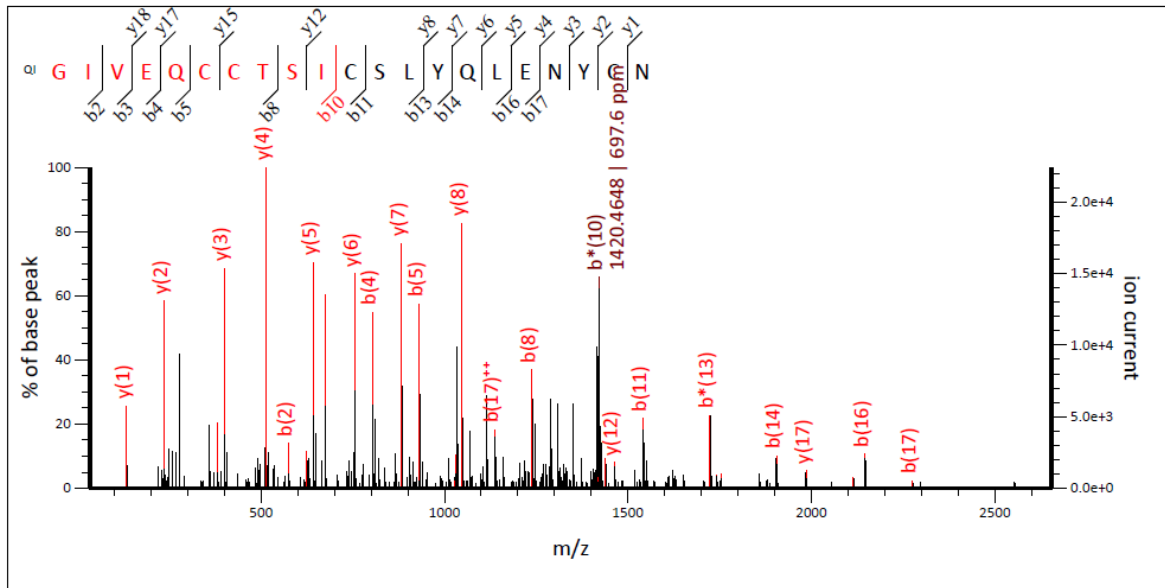

Monoisotopic mass of neutral peptide  $M_r(\text{calc})$ : 2786.0177

Variable modifications:

N-term: QiangM (N-term)

Ions Score: 117 Expect: 1.9e-012

Matches: 37/218 fragment ions using 46 most intense peaks

| #  | b                | b <sup>++</sup>  | b <sup>*</sup>   | b <sup>***</sup> | b <sup>0</sup>   | b <sup>0++</sup> | Seq. | y                | y <sup>++</sup> | y <sup>*</sup>   | y <sup>***</sup> | y <sup>0</sup>   | y <sup>0++</sup> | #  |
|----|------------------|------------------|------------------|------------------|------------------|------------------|------|------------------|-----------------|------------------|------------------|------------------|------------------|----|
| 1  | 462.0464         | 231.5269         |                  |                  |                  |                  | G    |                  |                 |                  |                  |                  |                  | 21 |
| 2  | <b>575.1305</b>  | 288.0689         |                  |                  |                  |                  | I    | 2325.9858        | 1163.4966       | 2308.9593        | 1154.9833        | 2307.9753        | 1154.4913        | 20 |
| 3  | <b>674.1989</b>  | 337.6031         |                  |                  |                  |                  | V    | 2212.9018        | 1106.9545       | 2195.8752        | 1098.4413        | 2194.8912        | 1097.9492        | 19 |
| 4  | <b>803.2415</b>  | 402.1244         |                  |                  | 785.2309         | 393.1191         | E    | <b>2113.8334</b> | 1057.4203       | 2096.8068        | 1048.9070        | 2095.8228        | <b>1048.4150</b> | 18 |
| 5  | <b>931.3001</b>  | 466.1537         | 914.2735         | 457.6404         | 913.2895         | 457.1484         | Q    | <b>1984.7908</b> | 992.8990        | 1967.7642        | 984.3857         | 1966.7802        | 983.8937         | 17 |
| 6  | 1034.3093        | 517.6583         | 1017.2827        | 509.1450         | 1016.2987        | 508.6530         | C    | 1856.7322        | 928.8697        | 1839.7056        | 920.3565         | 1838.7216        | 919.8645         | 16 |
| 7  | <b>1137.3185</b> | 569.1629         | 1120.2919        | 560.6496         | 1119.3079        | 560.1576         | C    | <b>1753.7230</b> | 877.3651        | 1736.6965        | 868.8519         | 1735.7124        | 868.3599         | 15 |
| 8  | <b>1238.3661</b> | 619.6867         | 1221.3396        | 611.1734         | 1220.3556        | 610.6814         | T    | 1650.7138        | 825.8605        | 1633.6873        | 817.3473         | 1632.7033        | 816.8553         | 14 |
| 9  | 1325.3982        | 663.2027         | 1308.3716        | 654.6894         | 1307.3876        | 654.1974         | S    | 1549.6661        | 775.3367        | 1532.6396        | 766.8234         | 1531.6556        | 766.3314         | 13 |
| 10 | <b>1438.4822</b> | 719.7448         | <b>1421.4557</b> | 711.2315         | <b>1420.4717</b> | 710.7395         | I    | <b>1462.6341</b> | 731.8207        | 1445.6076        | 723.3074         | 1444.6235        | 722.8154         | 12 |
| 11 | <b>1541.4914</b> | 771.2493         | 1524.4649        | 762.7361         | 1523.4808        | 762.2441         | C    | 1349.5500        | 675.2787        | 1332.5235        | 666.7654         | 1331.5395        | 666.2734         | 11 |
| 12 | 1628.5234        | 814.7654         | 1611.4969        | 806.2521         | 1610.5129        | 805.7601         | S    | 1246.5409        | <b>623.7741</b> | 1229.5143        | 615.2608         | 1228.5303        | 614.7688         | 10 |
| 13 | <b>1741.6075</b> | 871.3074         | <b>1724.5810</b> | 862.7941         | <b>1723.5969</b> | 862.3021         | L    | 1159.5088        | 580.2581        | 1142.4823        | 571.7448         | 1141.4983        | 571.2528         | 9  |
| 14 | <b>1904.6708</b> | 952.8391         | 1887.6443        | 944.3258         | 1886.6603        | 943.8338         | Y    | <b>1046.4248</b> | 523.7160        | <b>1029.3982</b> | 515.2027         | <b>1028.4142</b> | <b>514.7107</b>  | 8  |
| 15 | 2032.7294        | 1016.8683        | 2015.7029        | 1008.3551        | 2014.7188        | 1007.8631        | Q    | <b>883.3614</b>  | 442.1844        | 866.3349         | 433.6711         | 865.3509         | 433.1791         | 7  |
| 16 | <b>2145.8135</b> | 1073.4104        | 2128.7869        | 1064.8971        | 2127.8029        | 1064.4051        | L    | <b>755.3029</b>  | 378.1551        | 738.2763         | 369.6418         | 737.2923         | 369.1498         | 6  |
| 17 | <b>2274.8561</b> | <b>1137.9317</b> | 2257.8295        | 1129.4184        | 2256.8455        | 1128.9264        | E    | <b>642.2188</b>  | 321.6130        | <b>625.1923</b>  | 313.0998         | <b>624.2082</b>  | 312.6078         | 5  |
| 18 | 2388.8990        | 1194.9531        | 2371.8724        | 1186.4399        | 2370.8884        | 1185.9479        | N    | <b>513.1762</b>  | 257.0917        | 496.1497         | 248.5785         |                  |                  | 4  |
| 19 | 2551.9623        | 1276.4848        | 2534.9358        | 1267.9715        | 2533.9518        | 1267.4795        | Y    | <b>399.1333</b>  | 200.0703        | <b>382.1067</b>  | 191.5570         |                  |                  | 3  |
| 20 | 2654.9715        | 1327.9894        | 2637.9450        | 1319.4761        | 2636.9609        | 1318.9841        | C    | <b>236.0700</b>  | 118.5386        | 219.0434         | 110.0253         |                  |                  | 2  |
| 21 |                  |                  |                  |                  |                  |                  | N    | <b>133.0608</b>  | 67.0340         | 116.0342         | 58.5207          |                  |                  | 1  |

MS/MS spectrum of modified B chain:

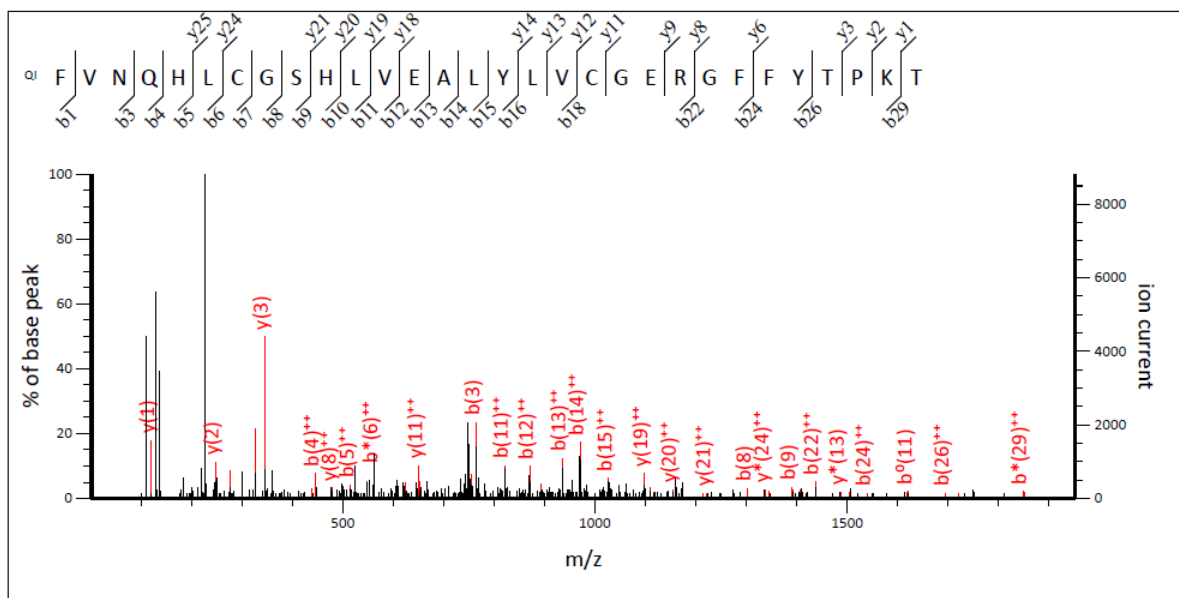

Monoisotopic mass of neutral peptide Mr(calc): 3831.7023

Variable modifications:

N-term: QiangM (N-term)

Ions Score: 55 Expect: 2.8e-006

Matches: 63/326 fragment ions using 160 most intense peaks



| #  | b         | b <sup>++</sup> | b*        | b <sup>+++</sup> | b <sup>0</sup> | b <sup>0++</sup> | Seq. | y         | y <sup>++</sup> | y*        | y <sup>+++</sup> | y <sup>0</sup> | y <sup>0++</sup> | #  |
|----|-----------|-----------------|-----------|------------------|----------------|------------------|------|-----------|-----------------|-----------|------------------|----------------|------------------|----|
| 1  | 552.0934  | 276.5503        |           |                  |                |                  | F    |           |                 |           |                  |                |                  | 30 |
| 2  | 651.1618  | 326.0845        |           |                  |                |                  | V    | 3281.6234 | 1641.3154       | 3264.5969 | 1632.8021        | 3263.6129      | 1632.3101        | 29 |
| 3  | 765.2047  | 383.1060        | 748.1782  | 374.5927         |                |                  | N    | 3182.5550 | 1591.7812       | 3165.5285 | 1583.2679        | 3164.5445      | 1582.7759        | 28 |
| 4  | 893.2633  | 447.1353        | 876.2368  | 438.6220         |                |                  | Q    | 3068.5121 | 1534.7597       | 3051.4855 | 1526.2464        | 3050.5015      | 1525.7544        | 27 |
| 5  | 1030.3222 | 515.6647        | 1013.2957 | 507.1515         |                |                  | H    | 2940.4535 | 1470.7304       | 2923.4270 | 1462.2171        | 2922.4430      | 1461.7251        | 26 |
| 6  | 1143.4063 | 572.2068        | 1126.3797 | 563.6935         |                |                  | L    | 2803.3946 | 1402.2009       | 2786.3681 | 1393.6877        | 2785.3840      | 1393.1957        | 25 |
| 7  | 1246.4155 | 623.7114        | 1229.3889 | 615.1981         |                |                  | C    | 2690.3105 | 1345.6589       | 2673.2840 | 1337.1456        | 2672.3000      | 1336.6536        | 24 |
| 8  | 1303.4369 | 652.2221        | 1286.4104 | 643.7088         |                |                  | G    | 2587.3014 | 1294.1543       | 2570.2748 | 1285.6410        | 2569.2908      | 1285.1490        | 23 |
| 9  | 1390.4690 | 695.7381        | 1373.4424 | 687.2248         | 1372.4584      | 686.7328         | S    | 2530.2799 | 1265.6436       | 2513.2533 | 1257.1303        | 2512.2693      | 1256.6383        | 22 |
| 10 | 1527.5279 | 764.2676        | 1510.5013 | 755.7543         | 1509.5173      | 755.2623         | H    | 2443.2479 | 1222.1276       | 2426.2213 | 1213.6143        | 2425.2373      | 1213.1223        | 21 |
| 11 | 1640.6119 | 820.8096        | 1623.5854 | 812.2963         | 1622.6014      | 811.8043         | L    | 2306.1890 | 1153.5981       | 2289.1624 | 1145.0848        | 2288.1784      | 1144.5928        | 20 |
| 12 | 1739.6804 | 870.3438        | 1722.6538 | 861.8305         | 1721.6698      | 861.3385         | V    | 2193.1049 | 1097.0561       | 2176.0783 | 1088.5428        | 2175.0943      | 1088.0508        | 19 |
| 13 | 1868.7229 | 934.8651        | 1851.6964 | 926.3518         | 1850.7124      | 925.8598         | E    | 2094.0365 | 1047.5219       | 2077.0099 | 1039.0086        | 2076.0259      | 1038.5166        | 18 |
| 14 | 1939.7601 | 970.3837        | 1922.7335 | 961.8704         | 1921.7495      | 961.3784         | A    | 1964.9939 | 983.0006        | 1947.9673 | 974.4873         | 1946.9833      | 973.9953         | 17 |
| 15 | 2052.8441 | 1026.9257       | 2035.8176 | 1018.4124        | 2034.8336      | 1017.9204        | L    | 1893.9568 | 947.4820        | 1876.9302 | 938.9687         | 1875.9462      | 938.4767         | 16 |
| 16 | 2215.9075 | 1108.4574       | 2198.8809 | 1099.9441        | 2197.8969      | 1099.4521        | Y    | 1780.8727 | 890.9400        | 1763.8462 | 882.4267         | 1762.8621      | 881.9347         | 15 |
| 17 | 2328.9915 | 1164.9994       | 2311.9650 | 1156.4861        | 2310.9810      | 1155.9941        | L    | 1617.8094 | 809.4083        | 1600.7828 | 800.8951         | 1599.7988      | 800.4030         | 14 |
| 18 | 2428.0599 | 1214.5336       | 2411.0334 | 1206.0203        | 2410.0494      | 1205.5283        | V    | 1504.7253 | 752.8663        | 1487.6988 | 744.3530         | 1486.7147      | 743.8610         | 13 |
| 19 | 2531.0691 | 1266.0382       | 2514.0426 | 1257.5249        | 2513.0585      | 1257.0329        | C    | 1405.6569 | 703.3321        | 1388.6304 | 694.8188         | 1387.6463      | 694.3268         | 12 |
| 20 | 2588.0906 | 1294.5489       | 2571.0640 | 1286.0357        | 2570.0800      | 1285.5436        | G    | 1302.6477 | 651.8275        | 1285.6212 | 643.3142         | 1284.6371      | 642.8222         | 11 |
| 21 | 2717.1332 | 1359.0702       | 2700.1066 | 1350.5569        | 2699.1226      | 1350.0649        | E    | 1245.6263 | 623.3168        | 1228.5997 | 614.8035         | 1227.6157      | 614.3115         | 10 |
| 22 | 2873.2343 | 1437.1208       | 2856.2077 | 1428.6075        | 2855.2237      | 1428.1155        | R    | 1116.5837 | 558.7955        | 1099.5571 | 550.2822         | 1098.5731      | 549.7902         | 9  |
| 23 | 2930.2557 | 1465.6315       | 2913.2292 | 1457.1182        | 2912.2452      | 1456.6262        | G    | 960.4825  | 480.7449        | 943.4560  | 472.2316         | 942.4720       | 471.7396         | 8  |
| 24 | 3077.3242 | 1539.1657       | 3060.2976 | 1530.6524        | 3059.3136      | 1530.1604        | F    | 903.4611  | 452.2342        | 886.4345  | 443.7209         | 885.4505       | 443.2289         | 7  |
| 25 | 3224.3926 | 1612.6999       | 3207.3660 | 1604.1867        | 3206.3820      | 1603.6946        | F    | 756.3927  | 378.7000        | 739.3661  | 370.1867         | 738.3821       | 369.6947         | 6  |
| 26 | 3387.4559 | 1694.2316       | 3370.4294 | 1685.7183        | 3369.4453      | 1685.2263        | Y    | 609.3243  | 305.1658        | 592.2977  | 296.6525         | 591.3137       | 296.1605         | 5  |
| 27 | 3488.5036 | 1744.7554       | 3471.4770 | 1736.2422        | 3470.4930      | 1735.7501        | T    | 446.2609  | 223.6341        | 429.2344  | 215.1208         | 428.2504       | 214.6288         | 4  |
| 28 | 3585.5563 | 1793.2818       | 3568.5298 | 1784.7685        | 3567.5458      | 1784.2765        | P    | 345.2132  | 173.1103        | 328.1867  | 164.5970         | 327.2027       | 164.1050         | 3  |
| 29 | 3713.6513 | 1857.3293       | 3696.6248 | 1848.8160        | 3695.6407      | 1848.3240        | K    | 248.1605  | 124.5839        | 231.1339  | 116.0706         | 230.1499       | 115.5786         | 2  |
| 30 |           |                 |           |                  |                |                  | T    | 120.0655  | 60.5364         |           |                  | 102.0550       | 51.5311          | 1  |

MS/MS data supported the modification of human insulin occurred at *N*-termini of the insulin instead of the lysine residue.

#### 4.2 Three-component one-pot conjugation and CuAAC

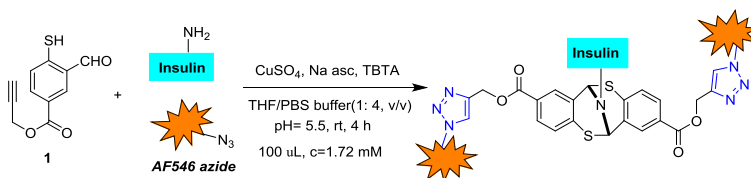

To a solution of human insulin (0.5 mg, 0.000086 mmol) in 40  $\mu$ L of PBS buffer (pH= 5.5) was added prop-2-yn-1-yl 3-formyl-4-mercaptopbenzoate **1** (0.24 mg, 0.0008 mmol) in 10  $\mu$ L of tetrahydrofuran. The final concentration of human insulin is 1.72 mM, the mixture was stirred at room temperature for 1 h. Then, 1.5  $\mu$ L of 0.01 M CuSO<sub>4</sub>, 3  $\mu$ L of 0.01 M sodium ascorbate and 3  $\mu$ L of 0.01 M TBTA was added to the mixture sequentially, monitored the reaction by LC-MS. The conversion of the one-pot conjugation is about 50% by LC-MS.

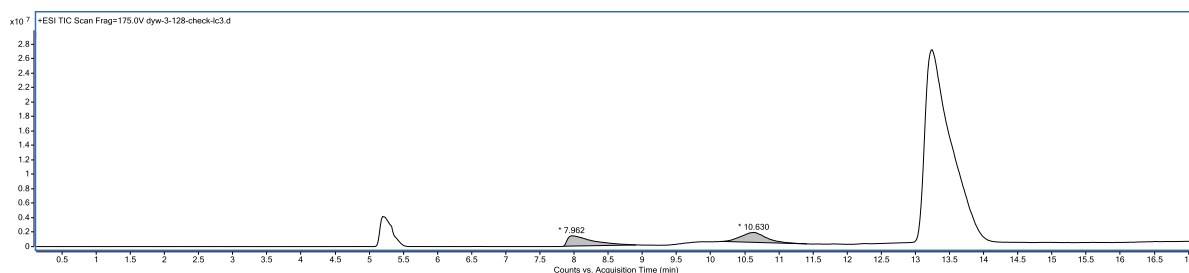

HPLC trace of the crude reaction mixture of one-pot conjugation, the ratio of insulin/product is 51:49. HPLC condition: 25 to 70% solvent B over 10 min, 14 min 95% solvent B. flow rate 0.5 mL/min, Higgins Analytical Proto 200 10  $\mu$ m 250  $\times$  4.6 nm C18 column. 5.2 min, salt peak; 8 min insulin; 10.5 min one-pot reaction product, 13.5 min AF546 azide.

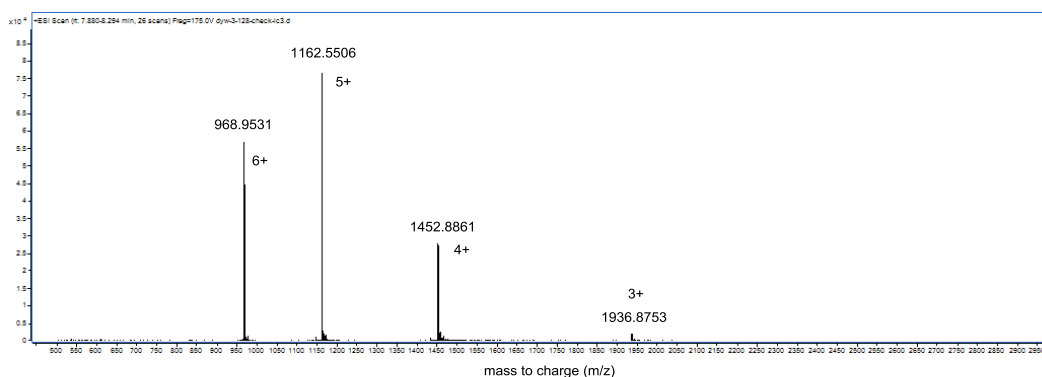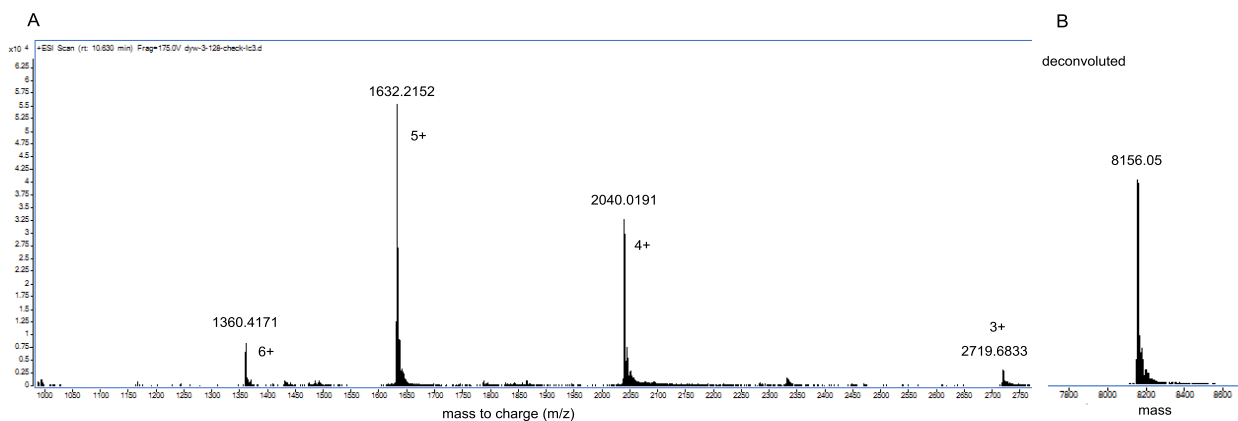

ESI-MS spectrum of one-pot product (+2348.6 Da adduct). (A) Raw spectrum. (B) Spectrum after deconvolution. Product: 8156.2 calculated, 8156.05 found.

## 5. X-Ray Crystal Structure of compound 4

### Compound 4 (CCDC 1825270)

Data collection was performed on a Bruker D8 VENTURE X-ray diffractometer with PHOTON 100 CMOS shutterless mode detector equipped with a Mo-target X-ray tube ( $\lambda = 0.71073 \text{ \AA}$ ) at  $T = 100(2) \text{ K}$ . Data reduction and integration were performed with the Bruker software package SAINT (version 8.38A).<sup>4</sup> Data were corrected for absorption effects using the empirical methods as implemented in SADABS (version 2016/2).<sup>5</sup> The structure was solved by SHELXT<sup>6</sup> and

refined by full-matrix least-squares procedures using the Bruker SHELXTL (version 2017/1) <sup>7</sup> software package. All non-hydrogen atoms were refined anisotropically. H-atoms were included at calculated positions and refined as riders, with  $U_{\text{iso}}(\text{H}) = 1.2 U_{\text{eq}}(\text{C})$  and  $U_{\text{iso}}(\text{H}) = 1.5 U_{\text{eq}}(\text{C})$  for methyl groups. Further crystal and data collection details are listed in Table 1. The structure of the compound is shown in Figure 1. The compound crystallizes in the  $P2_1/n$  (No. 14).

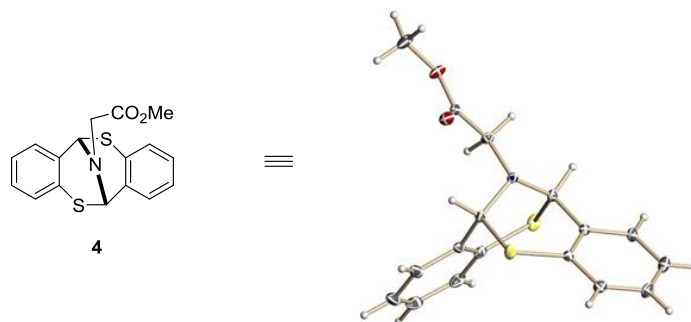

**Figure 1.** ORTEP drawing of **str2527** drawn with thermal ellipsoids at the 50% probability level. Color scheme used: C: grey; O: red; H: white; N: blue; S: yellow.

**Table 1.** Experimental details

| Crystal data                |                                                   |
|-----------------------------|---------------------------------------------------|
| Chemical formula            | $\text{C}_{17}\text{H}_{15}\text{NO}_2\text{S}_2$ |
| $M_r$                       | 329.42                                            |
| Crystal system, space group | Monoclinic, $P2_1/n$                              |
| Temperature (K)             | 100                                               |
| $a, b, c$ (Å)               | 15.2896 (5), 7.1208 (2), 15.8248 (5)              |
| $\beta$ (°)                 | 118.319 (1)                                       |
| $V$ (Å <sup>3</sup> )       | 1516.71 (8)                                       |
| $Z$                         | 4                                                 |
| Radiation type              | Mo $K\alpha$                                      |
| $\mu$ (mm <sup>-1</sup> )   | 0.36                                              |

|                                                                                     |                                                                                                                                                                                   |
|-------------------------------------------------------------------------------------|-----------------------------------------------------------------------------------------------------------------------------------------------------------------------------------|
| Crystal size (mm)                                                                   | 0.50 × 0.17 × 0.03                                                                                                                                                                |
| Data collection                                                                     |                                                                                                                                                                                   |
| Diffractometer                                                                      | Bruker D8 Venture PHOTON 100 CMOS<br>diffractometer                                                                                                                               |
| Absorption correction                                                               | Multi-scan<br><i>SADABS2016/2</i> (Bruker,2016/2) was used for absorption correction. Krause, L.,<br>Herbst-Irmer, R., Sheldrick G.M. & Stalke D., J. Appl. Cryst. 48 (2015) 3-10 |
| $T_{\min}, T_{\max}$                                                                | 0.935, 1                                                                                                                                                                          |
| No. of measured,<br>independent and<br>observed [ $I > 2\sigma(I)$ ]<br>reflections | 51025, 6047, 4936                                                                                                                                                                 |
| $R_{\text{int}}$                                                                    | 0.041                                                                                                                                                                             |
| $(\sin \theta/\lambda)_{\text{max}}$ ( $\text{\AA}^{-1}$ )                          | 0.781                                                                                                                                                                             |
| Refinement                                                                          |                                                                                                                                                                                   |
| $R[F^2 > 2\sigma(F^2)],$<br>$wR(F^2), S$                                            | 0.042, 0.091, 1.08                                                                                                                                                                |
| No. of reflections                                                                  | 6047                                                                                                                                                                              |
| No. of parameters                                                                   | 200                                                                                                                                                                               |
| No. of restraints                                                                   | 0                                                                                                                                                                                 |
| H-atom treatment                                                                    | H-atom parameters constrained                                                                                                                                                     |
| $\Delta\rho_{\text{max}}, \Delta\rho_{\text{min}}$ ( $\text{e \AA}^{-3}$ )          | 0.52, -0.31                                                                                                                                                                       |

---

Computer programs: *APEX3* v.2017.3-0 (Bruker AXS Inc., 2017), *SAINT* V.8.38A (Bruker AXS Inc., 2017), *SHELXT* 2014/5 (Sheldrick, 2014), *SHELXL2017/1* (Sheldrick, 2017), *Xshell* v.6.3.1 (Bruker AXS Inc., 2016).

## 6. References:

1. V. V. Rostovtsev, L. G. Green, V. V. Fokin, K. B. Sharpless, *Angew. Chem., Int. Ed.*, **2002**, *41*, 2596–2599.
2. C. LingáTung, T. Clarence, X. Li, *Org. Biomol. Chem.*, **2015**, *13*, 6922-6926.
3. A. Burrows, C. Frost, M. Mahon, C. Richardson, *Angew. Chem. Int. Ed.* **2008**, *47*, 8482 –8486.
4. SAINT; part of Bruker APEX3 software package (version 2017.3-0): Bruker AXS, 2017.
5. SADABS; part of Bruker APEX3 software package (version 2017.3-0): Bruker AXS, 2017.
6. SHELXT; Version 2014/5: G. M. Sheldrick, *Acta Cryst.* **2015**, *A71*, 3-8.
7. XL refinement program version 2016/6: G. M. Sheldrick, *Acta Cryst.* **2015**, *C71*, 3-8.

## 7. NMR spectra of new compounds

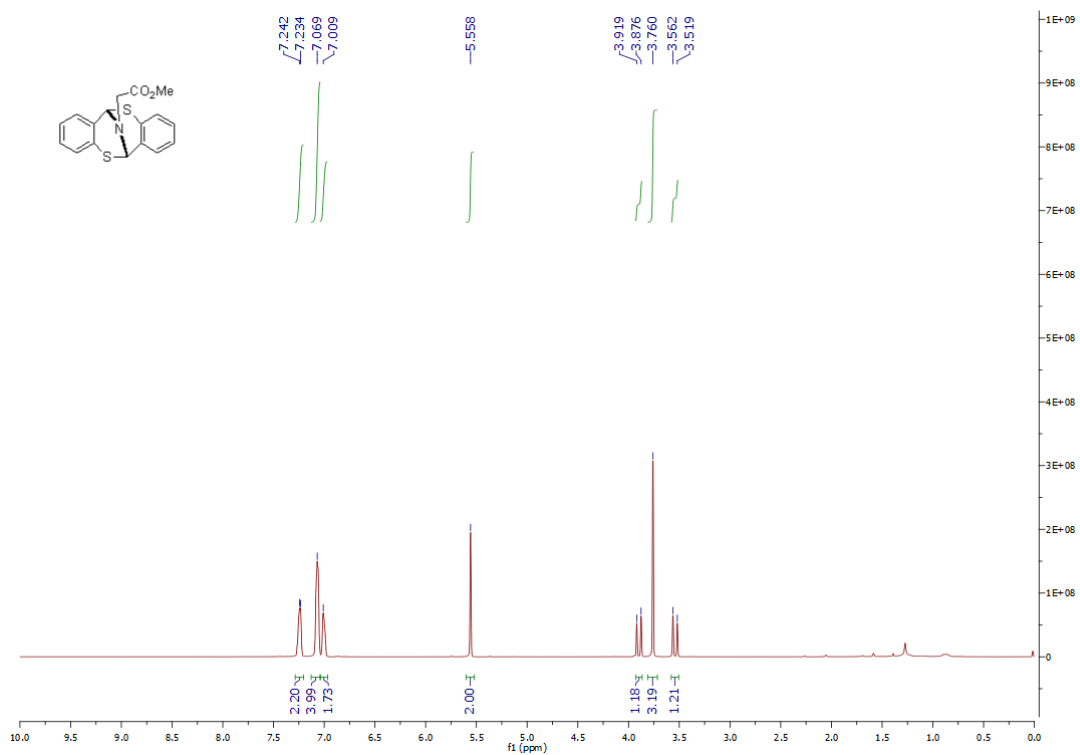

<sup>1</sup>H NMR spectrum of **4** in CDCl<sub>3</sub> (400 MHz).

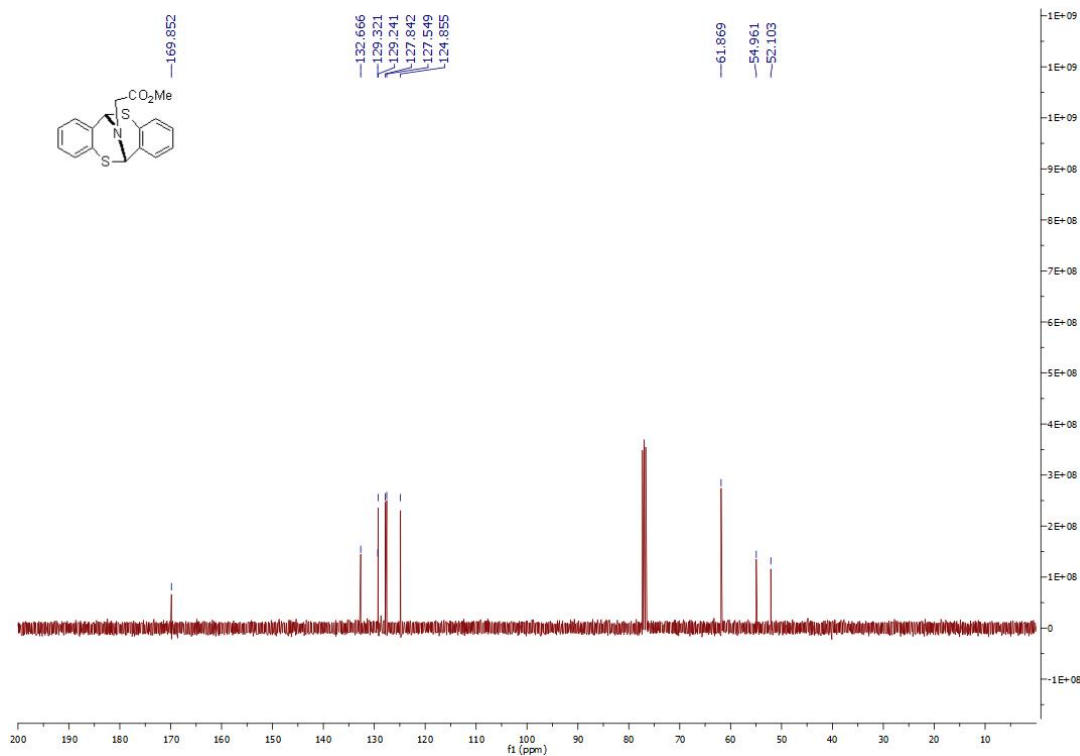

<sup>13</sup>C NMR spectrum of **4** in CDCl<sub>3</sub> (101 MHz).

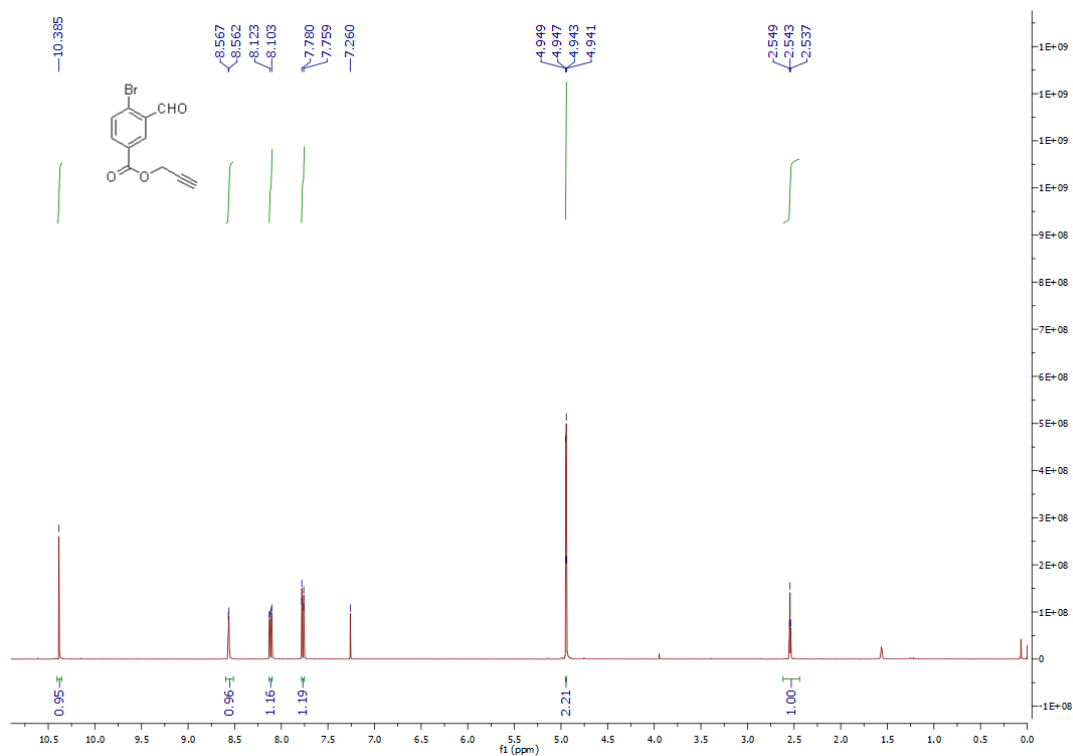

$^1\text{H}$  NMR spectrum of **10** in  $\text{CDCl}_3$  (500 MHz).

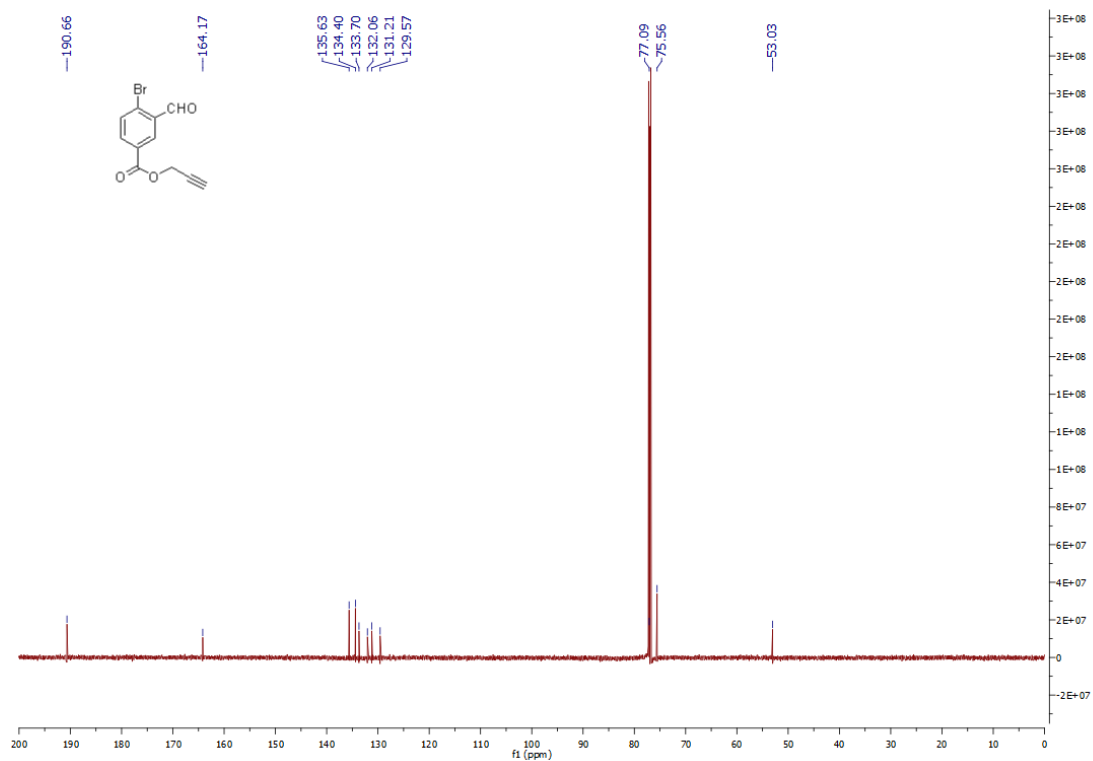

$^{13}\text{C}$  NMR spectrum of **10** in  $\text{CDCl}_3$  (126 MHz).

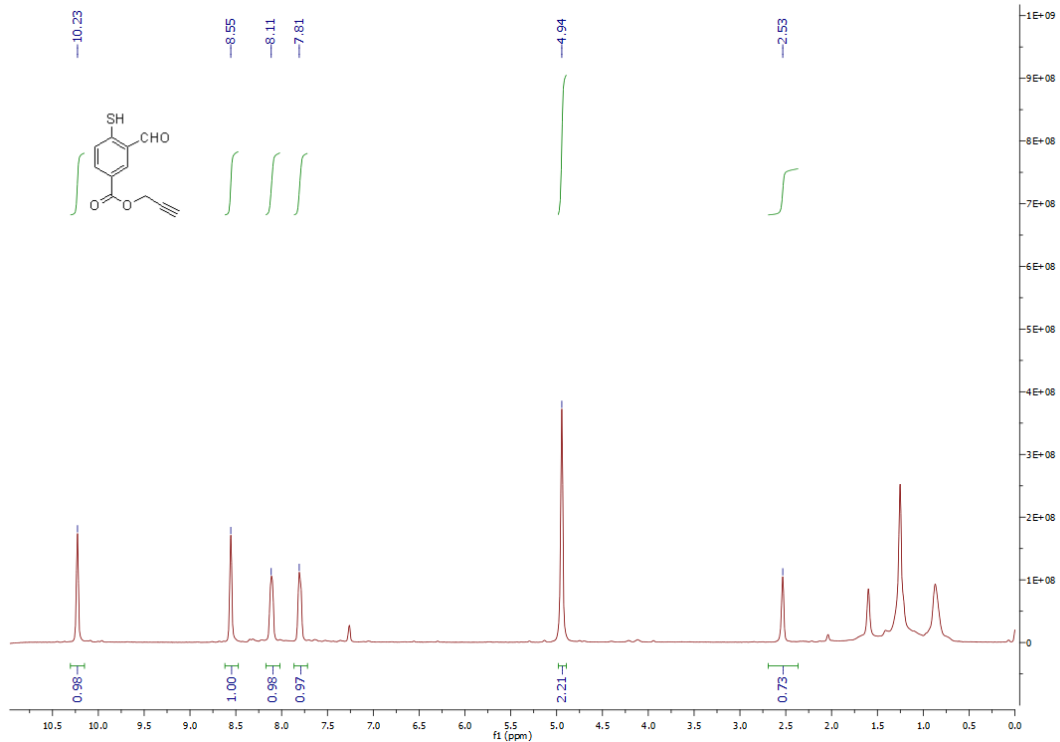

$^1\text{H}$  NMR spectrum of **1** in  $\text{CDCl}_3$  (400 MHz).

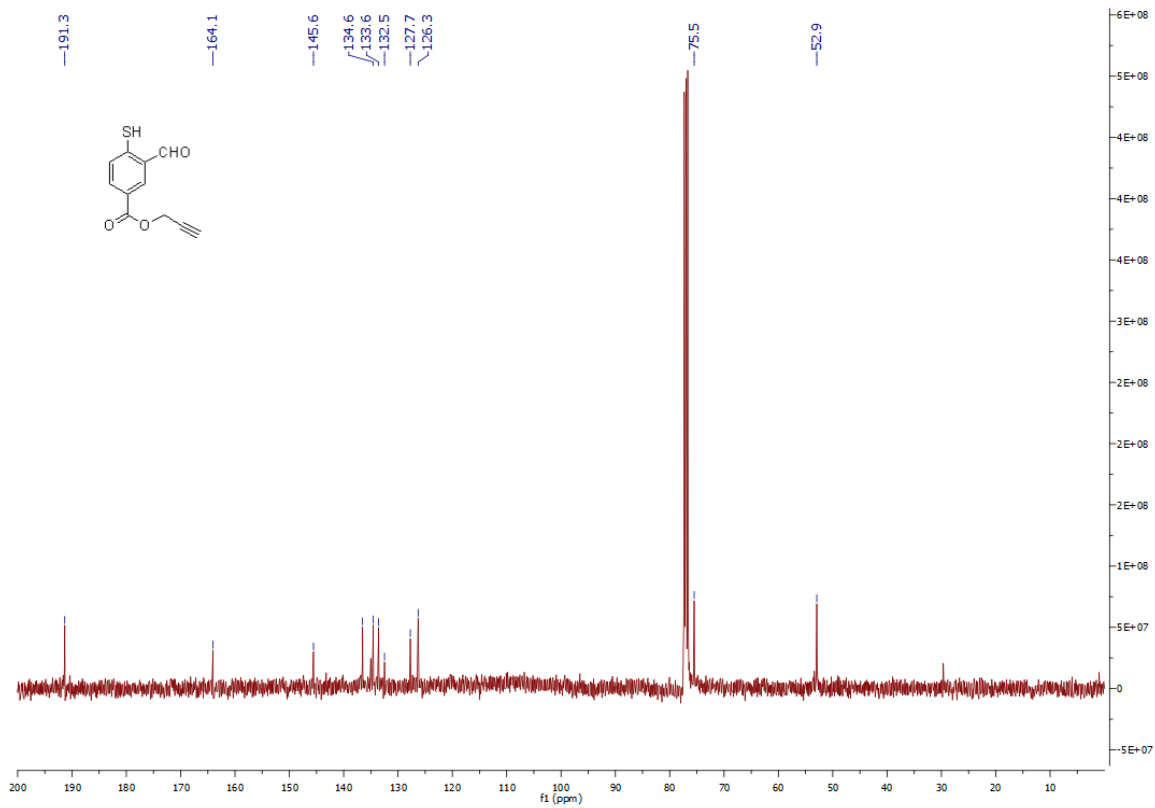

$^{13}\text{C}$  NMR spectrum of **1** in  $\text{CDCl}_3$  (101 MHz).



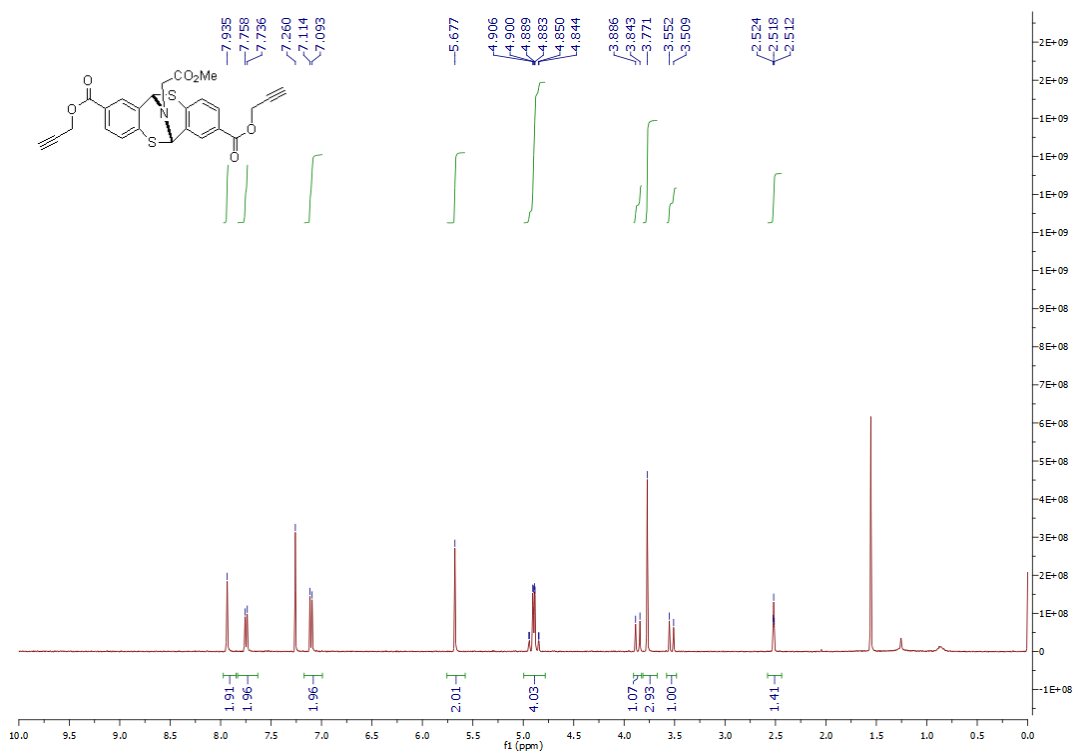

<sup>1</sup>H NMR spectrum of **11** in CDCl<sub>3</sub> (400 MHz).

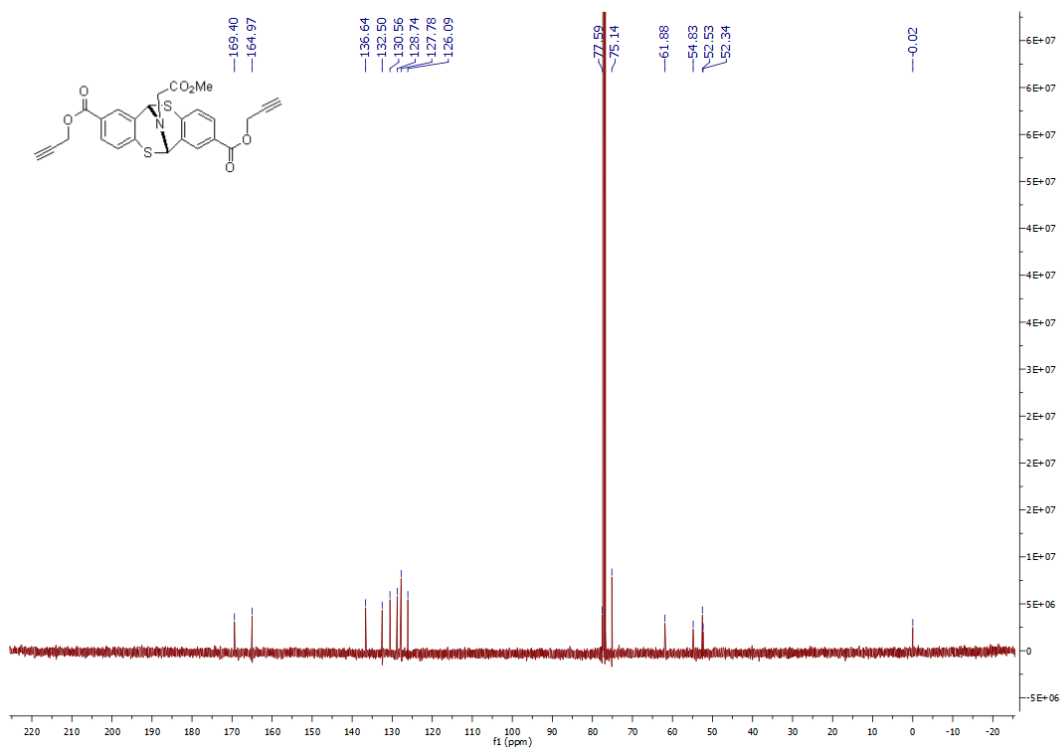

<sup>13</sup>C NMR spectrum of **11** in CDCl<sub>3</sub> (151 MHz).

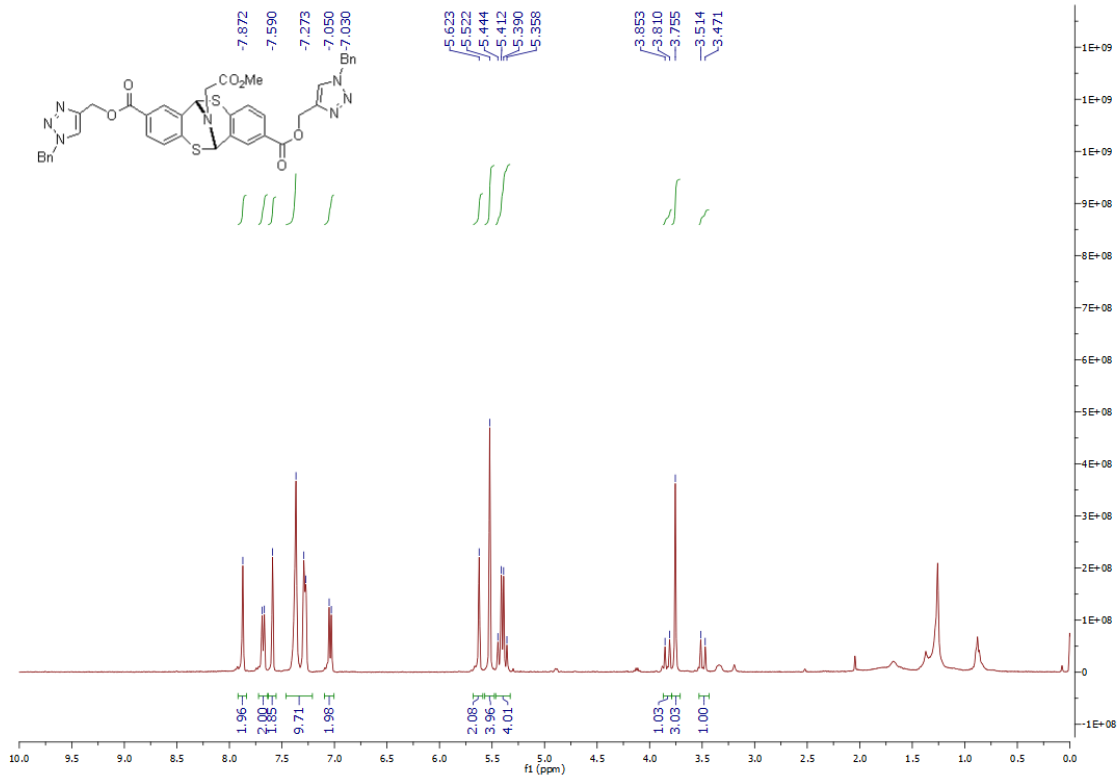

<sup>1</sup>H NMR spectrum of **13a** in CDCl<sub>3</sub> (400 MHz).

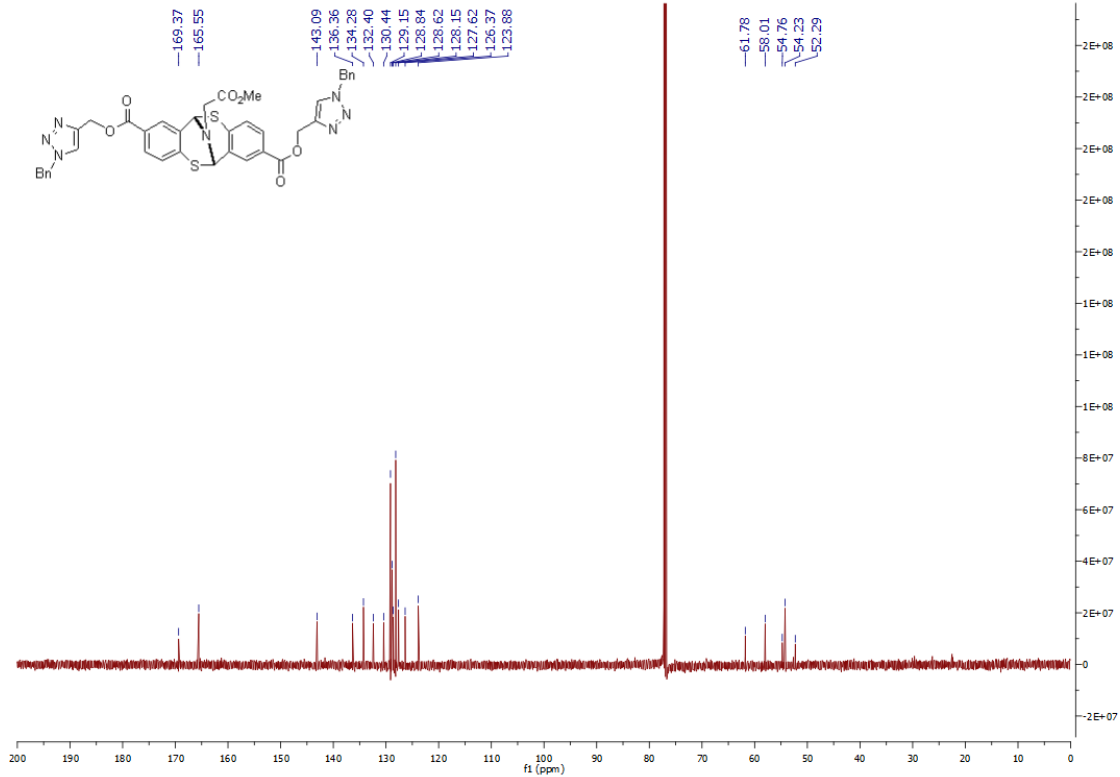

<sup>13</sup>C NMR spectrum of **13a** in CDCl<sub>3</sub> (151 MHz).

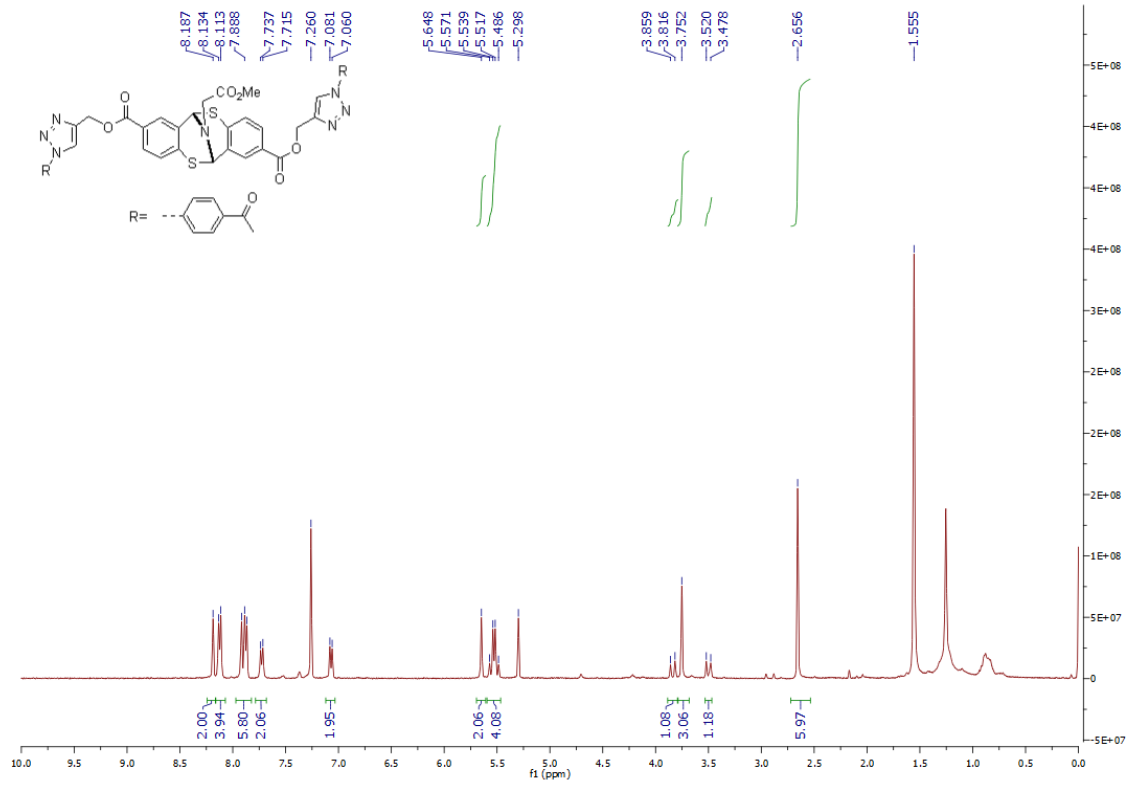

<sup>1</sup>H NMR spectrum of **13b** in CDCl<sub>3</sub> (400 MHz).

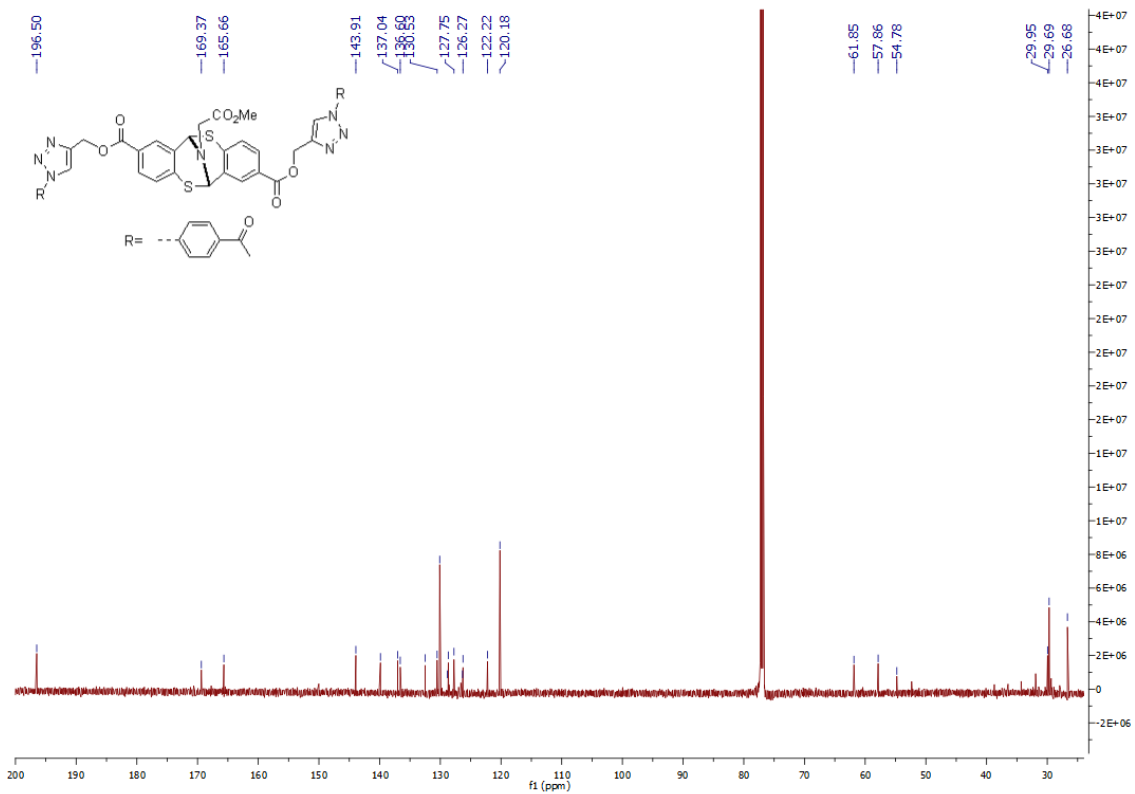

<sup>13</sup>C NMR spectrum of **13b** in CDCl<sub>3</sub> (151 MHz).

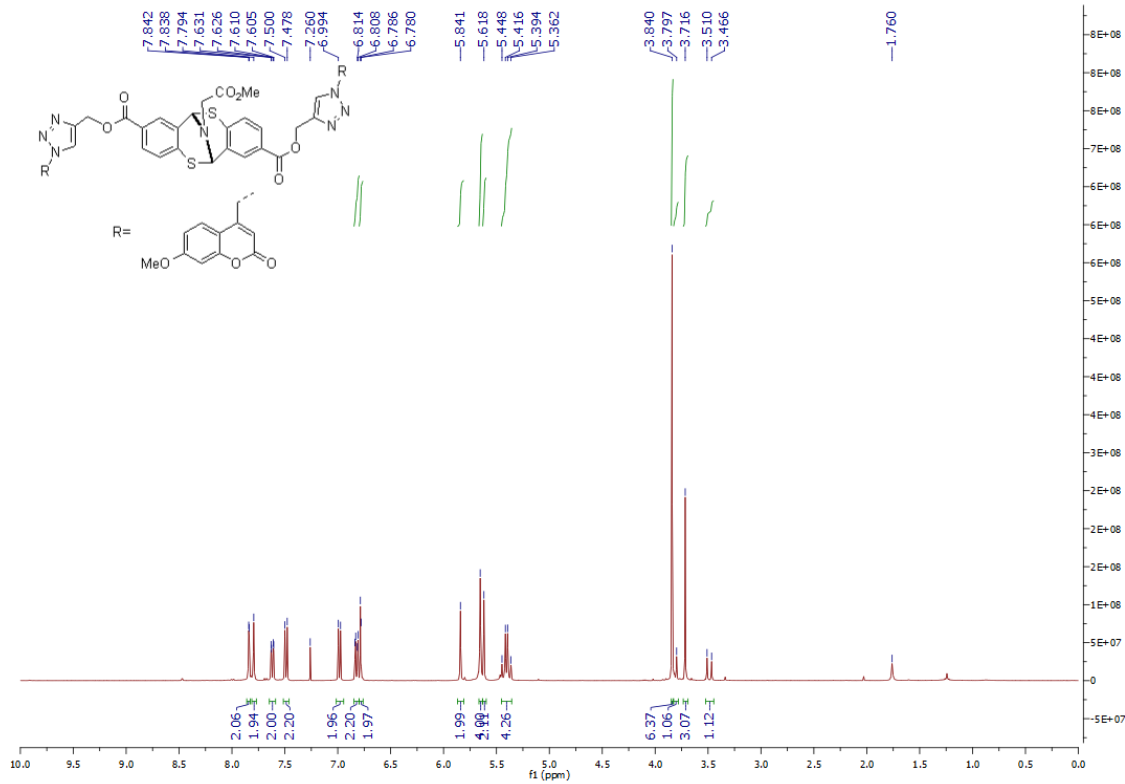

<sup>1</sup>H NMR spectrum of **13c** in CDCl<sub>3</sub> (400 MHz).

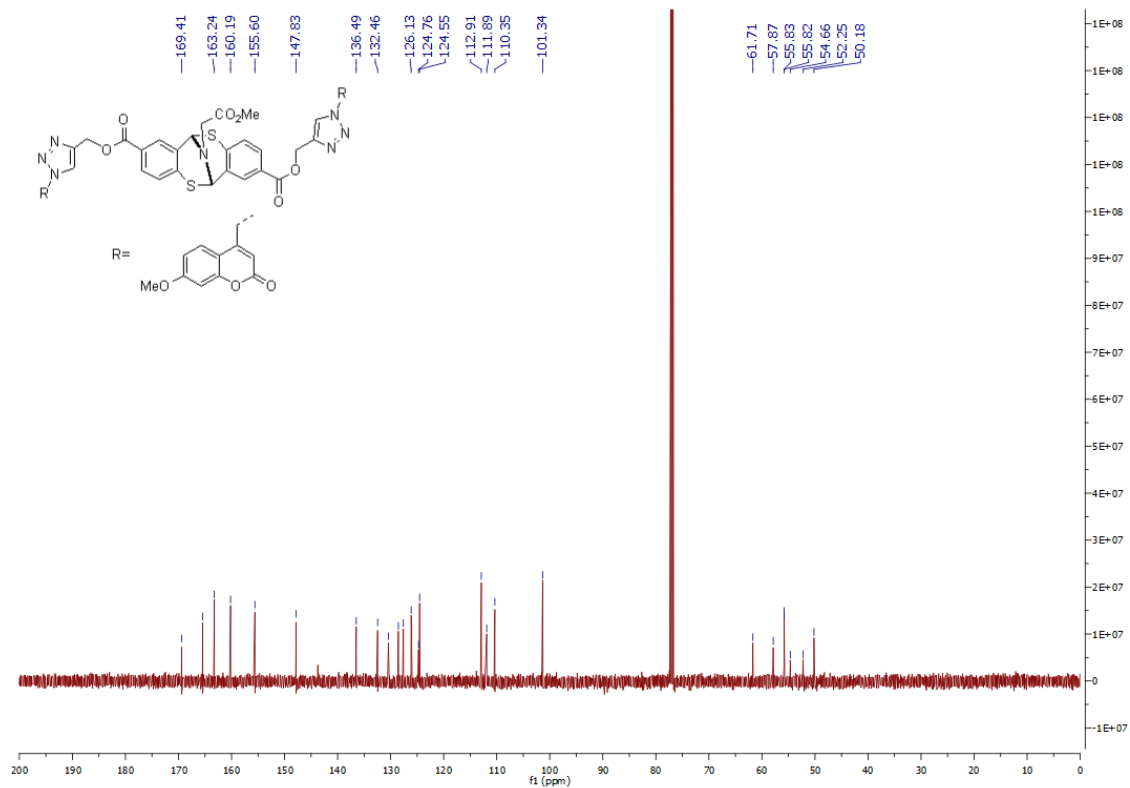

<sup>13</sup>C NMR spectrum of **13c** in CDCl<sub>3</sub> (151 MHz).

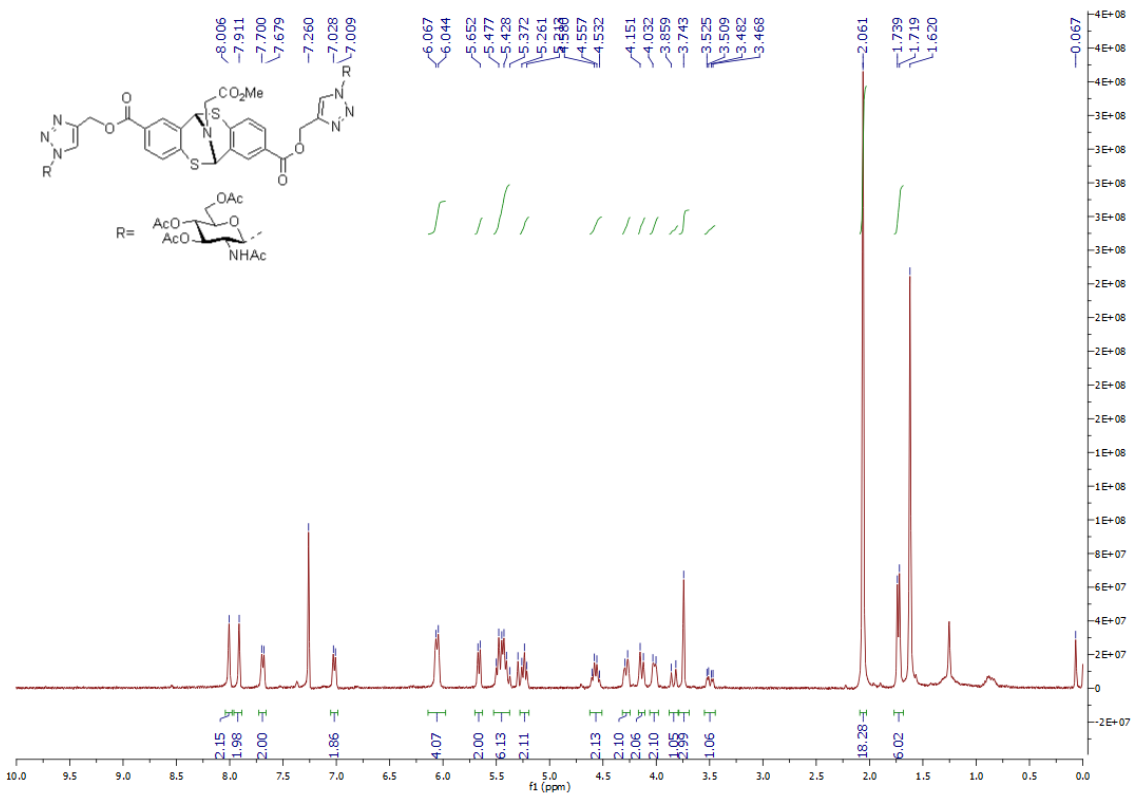

$^1\text{H}$  NMR spectrum of **13d** in  $\text{CDCl}_3$  (400 MHz).

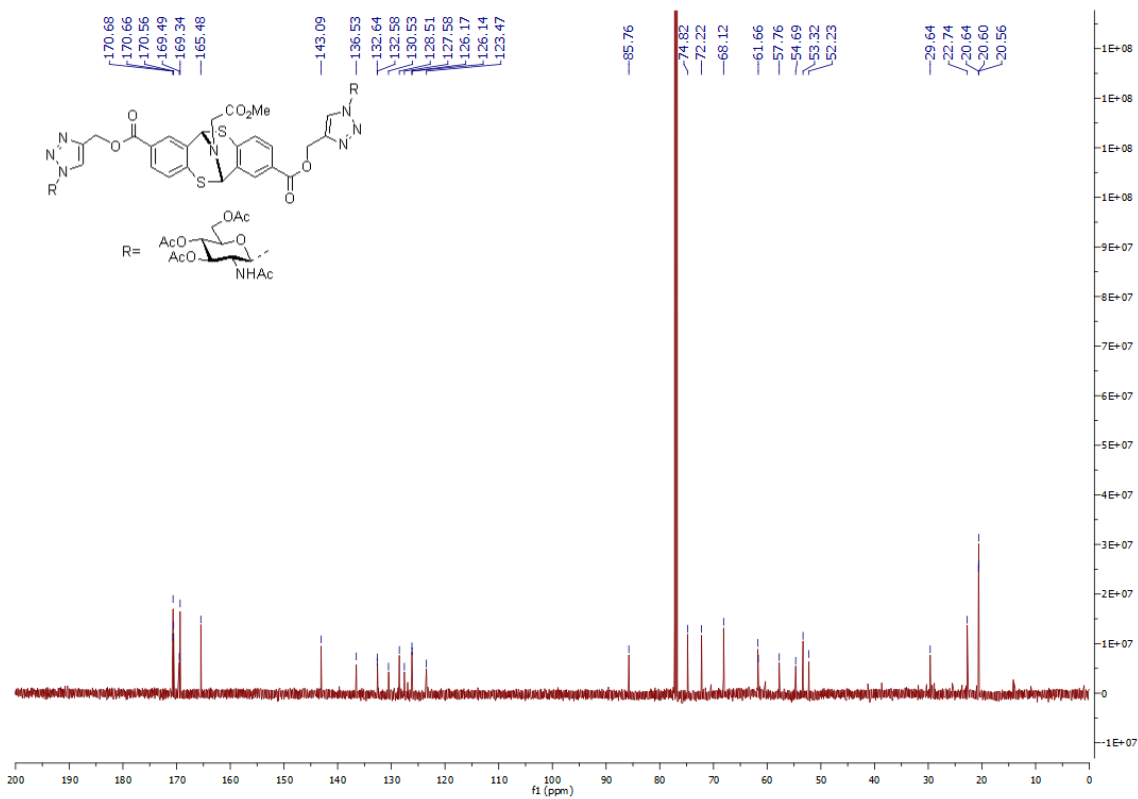

$^{13}\text{C}$  NMR spectrum of **13d** in  $\text{CDCl}_3$  (151 MHz).

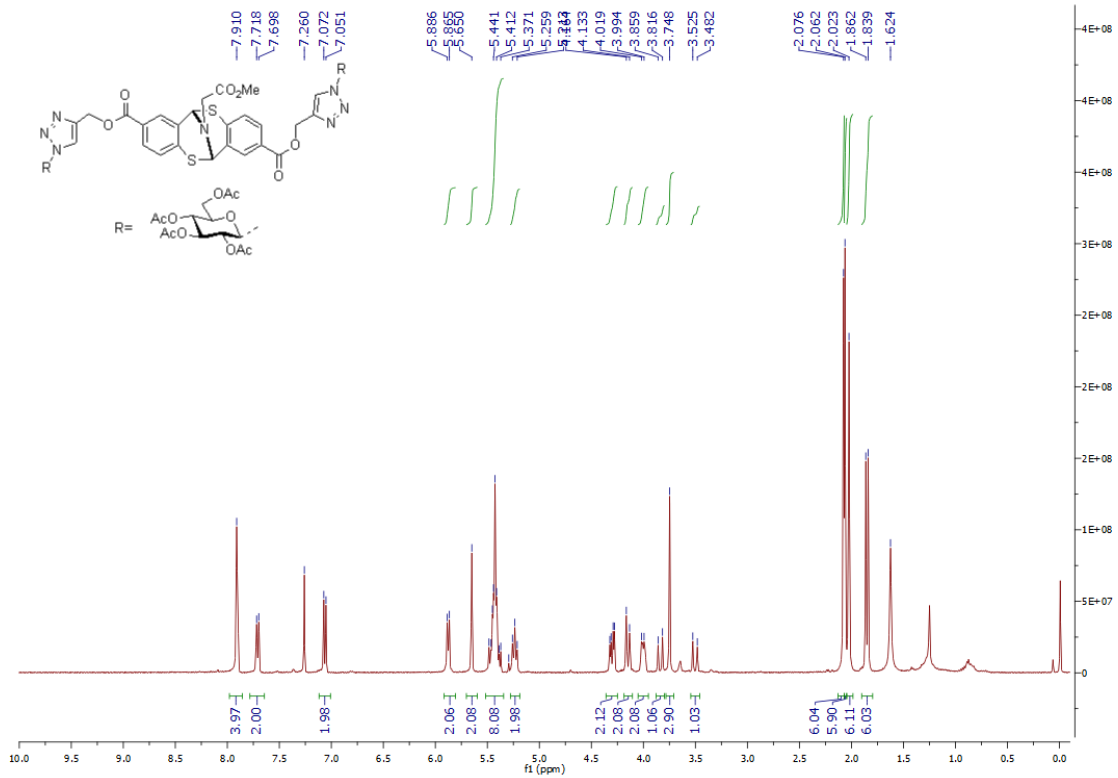

<sup>1</sup>H NMR spectrum of **13e** in CDCl<sub>3</sub> (400 MHz).

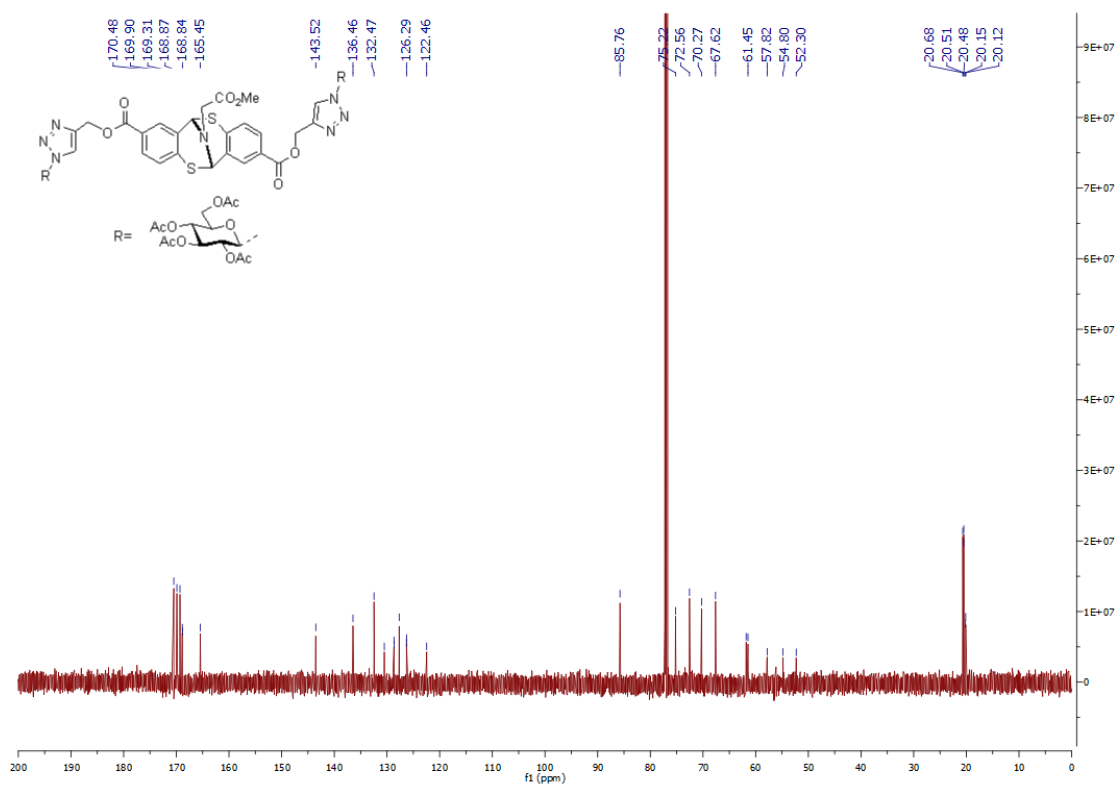

<sup>13</sup>C NMR spectrum of **13e** in CDCl<sub>3</sub> (151 MHz).

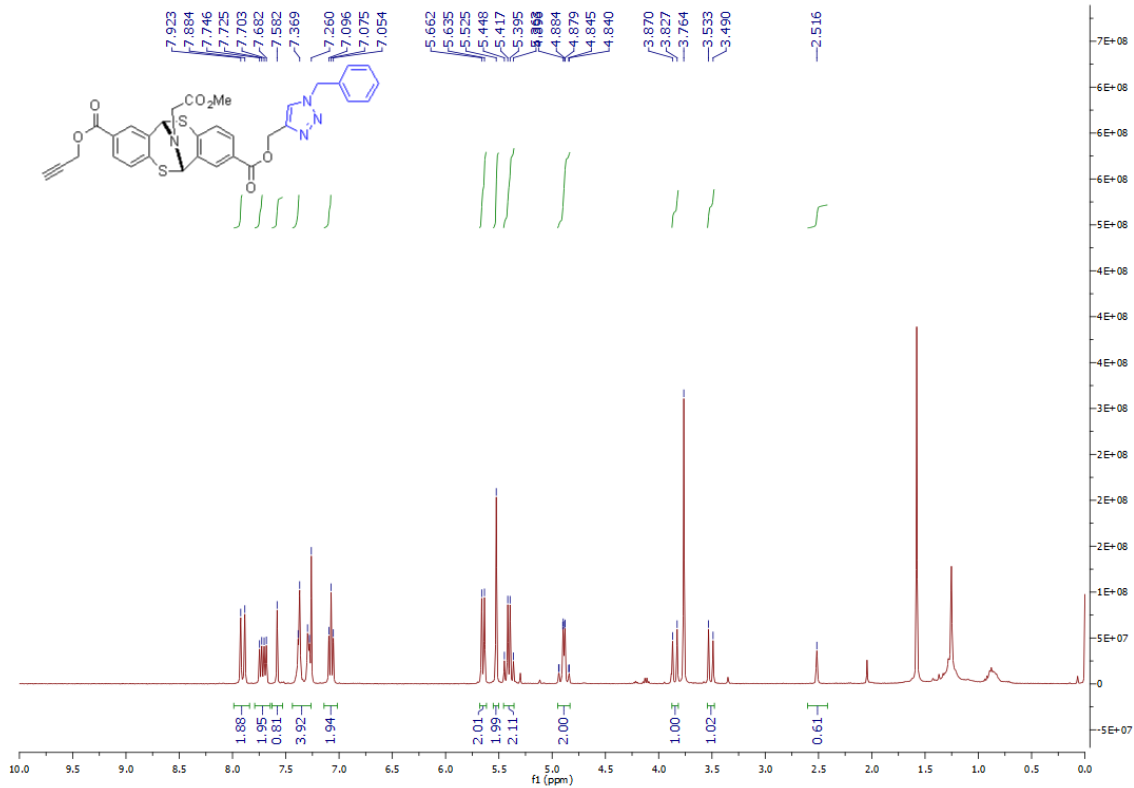

**<sup>1</sup>H NMR spectrum of **15a** in CDCl<sub>3</sub> (400 MHz).**

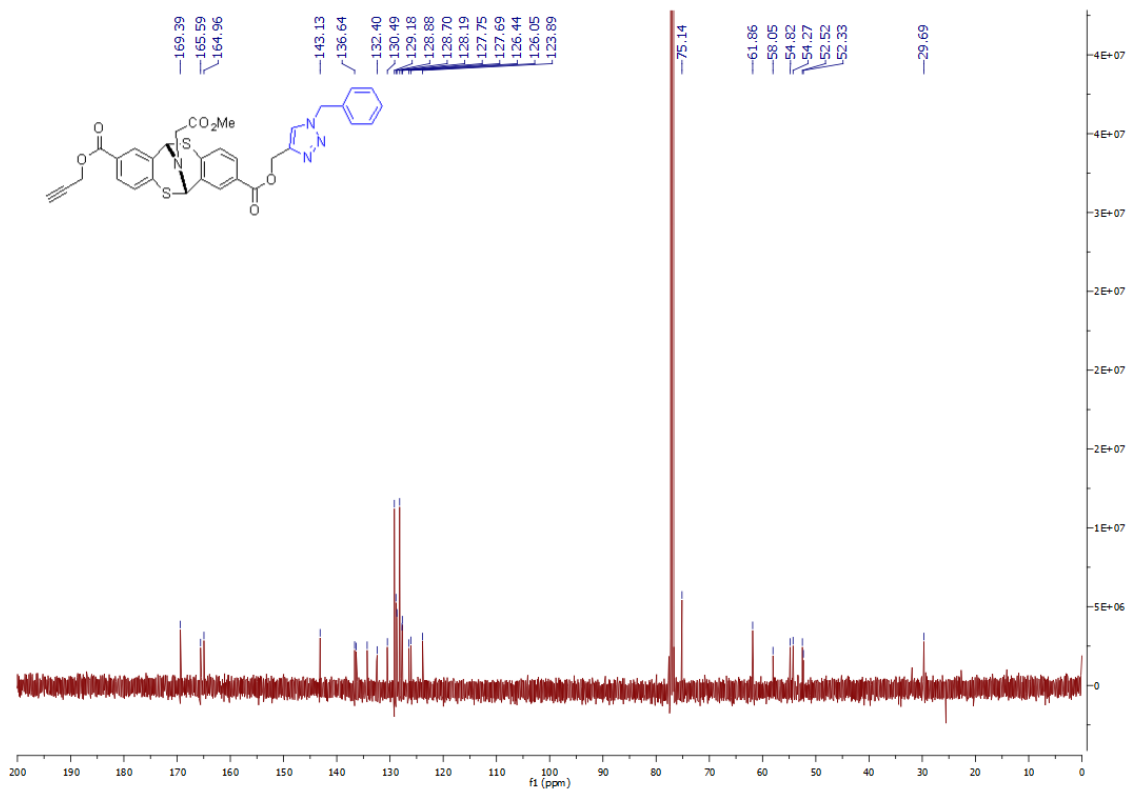

**<sup>13</sup>C NMR spectrum of **15a** in CDCl<sub>3</sub> (151 MHz).**

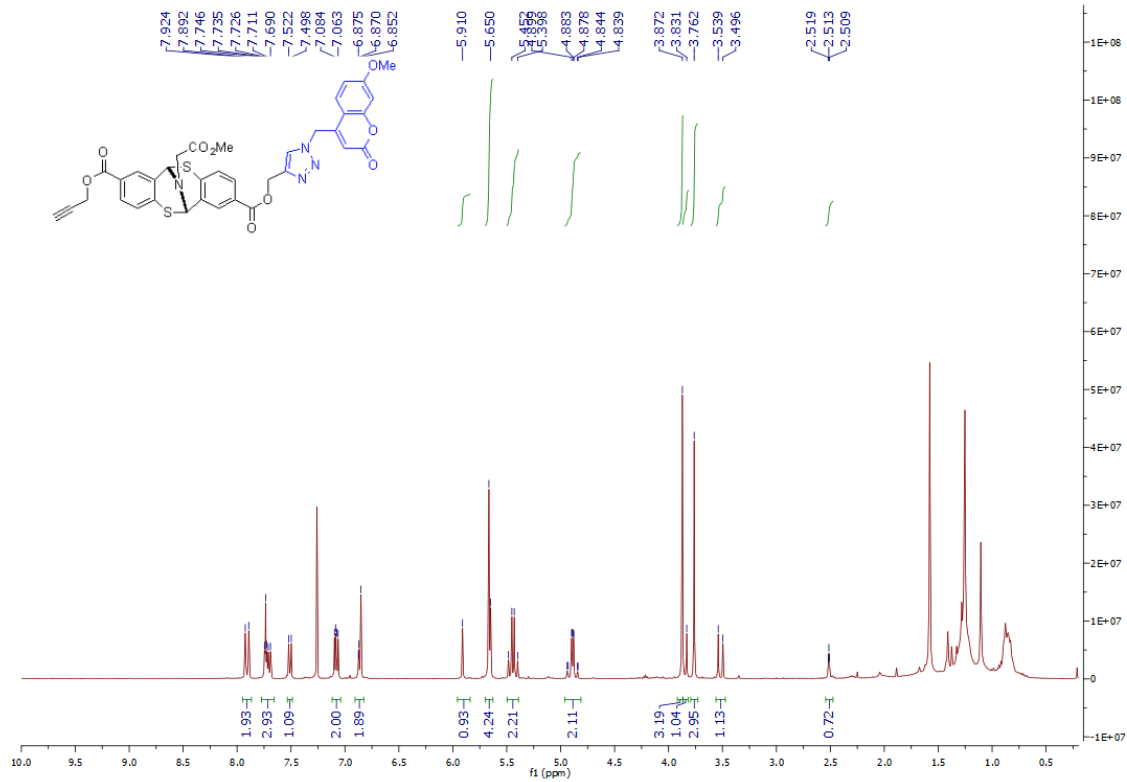

<sup>1</sup>H NMR spectrum of **15b** in CDCl<sub>3</sub> (400 MHz).

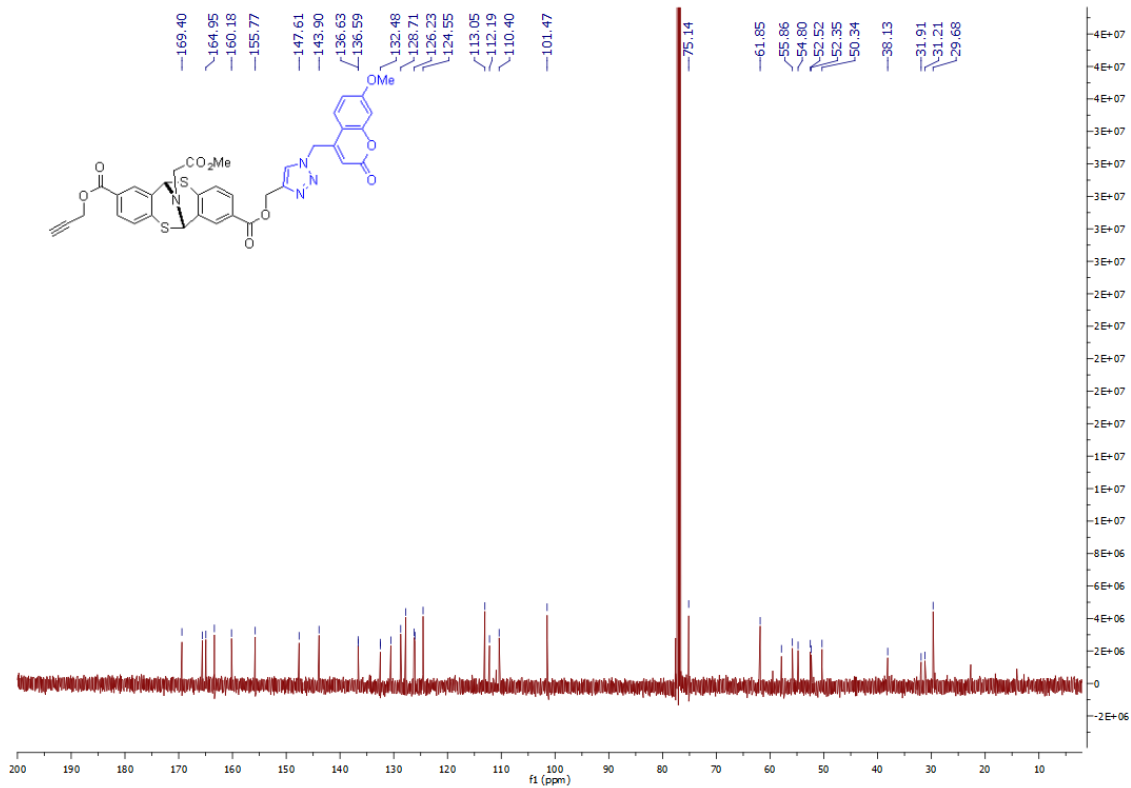

<sup>13</sup>C NMR spectrum of **15b** in CDCl<sub>3</sub> (151 MHz).



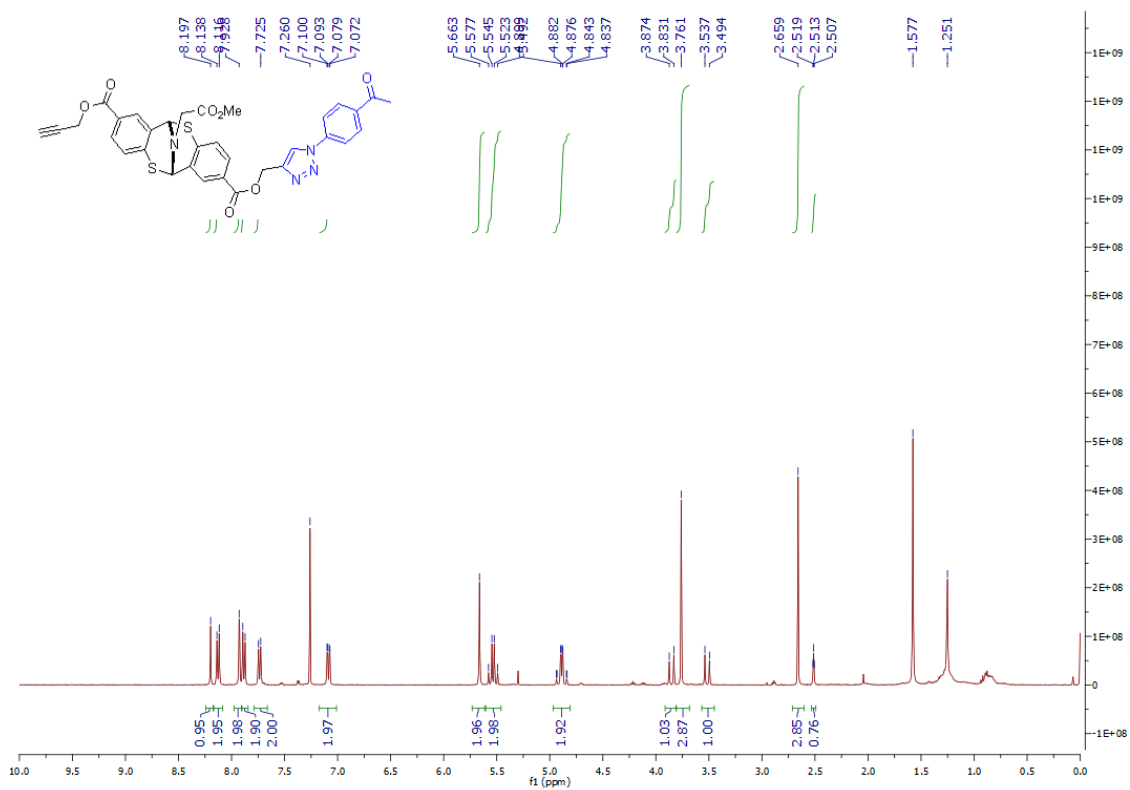

**<sup>1</sup>H NMR spectrum of **15c** in CDCl<sub>3</sub> (400 MHz).**

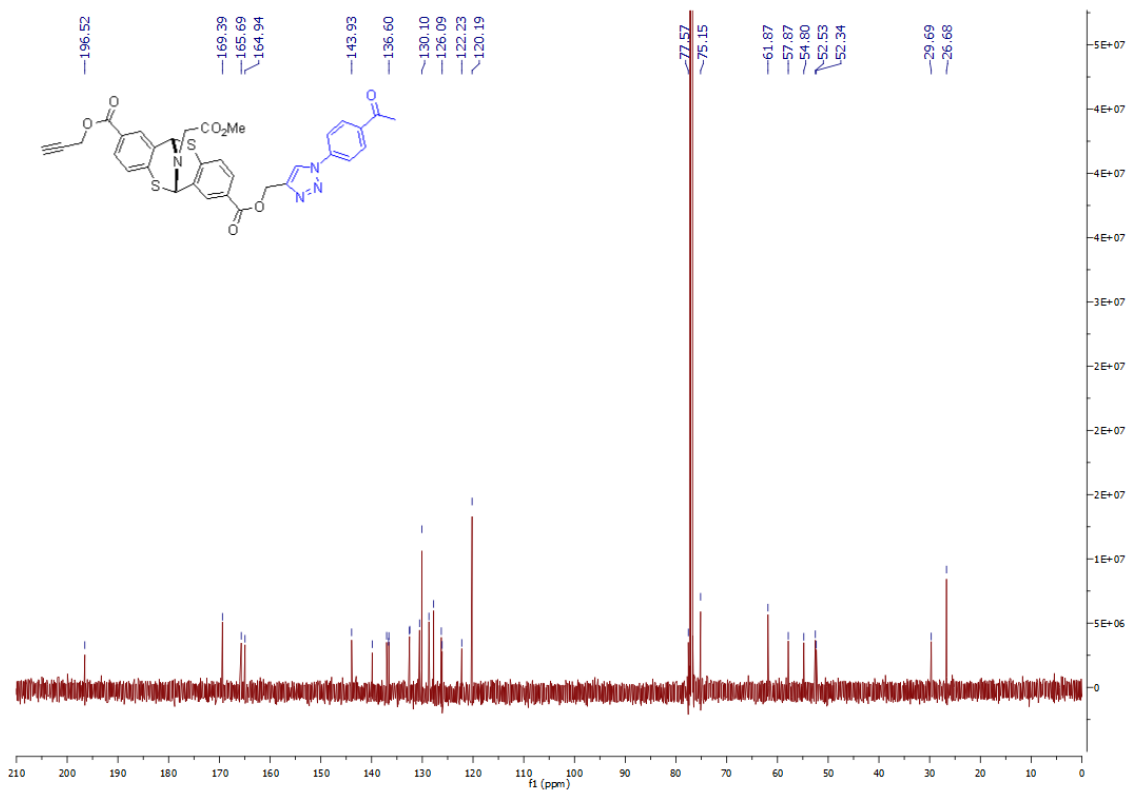

**<sup>13</sup>C NMR spectrum of **15c** in CDCl<sub>3</sub> (151 MHz).**

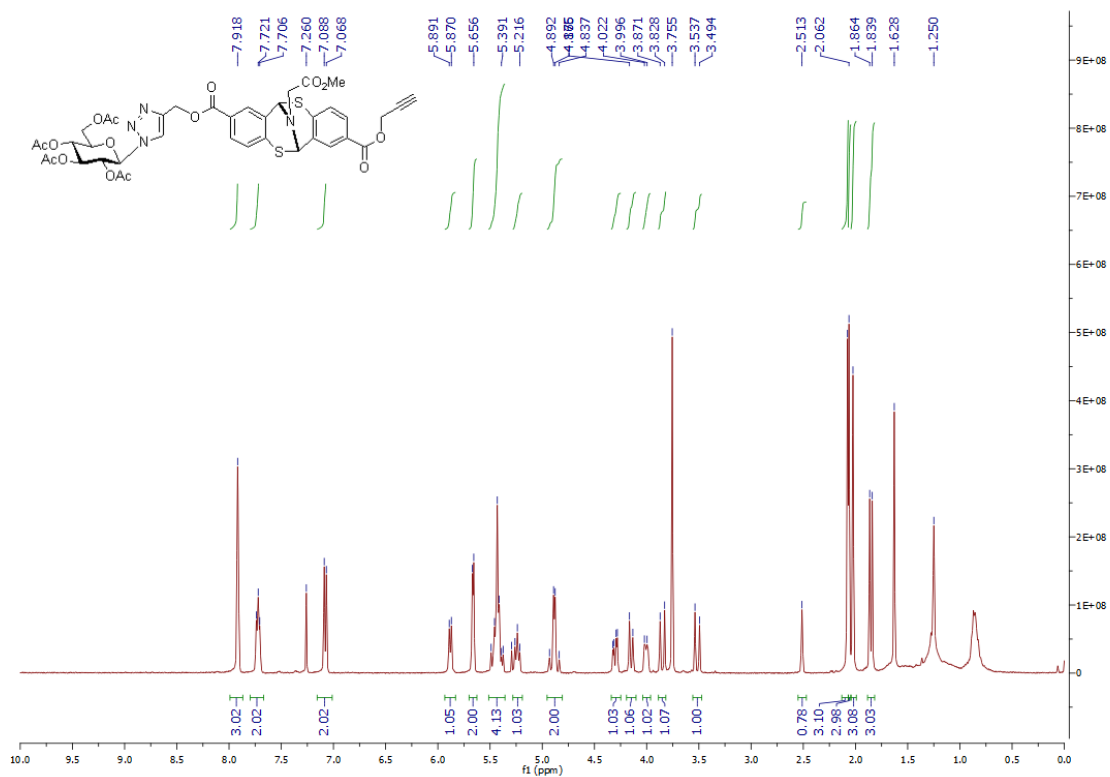

**<sup>1</sup>H NMR spectrum of **15d** in CDCl<sub>3</sub> (400 MHz).**

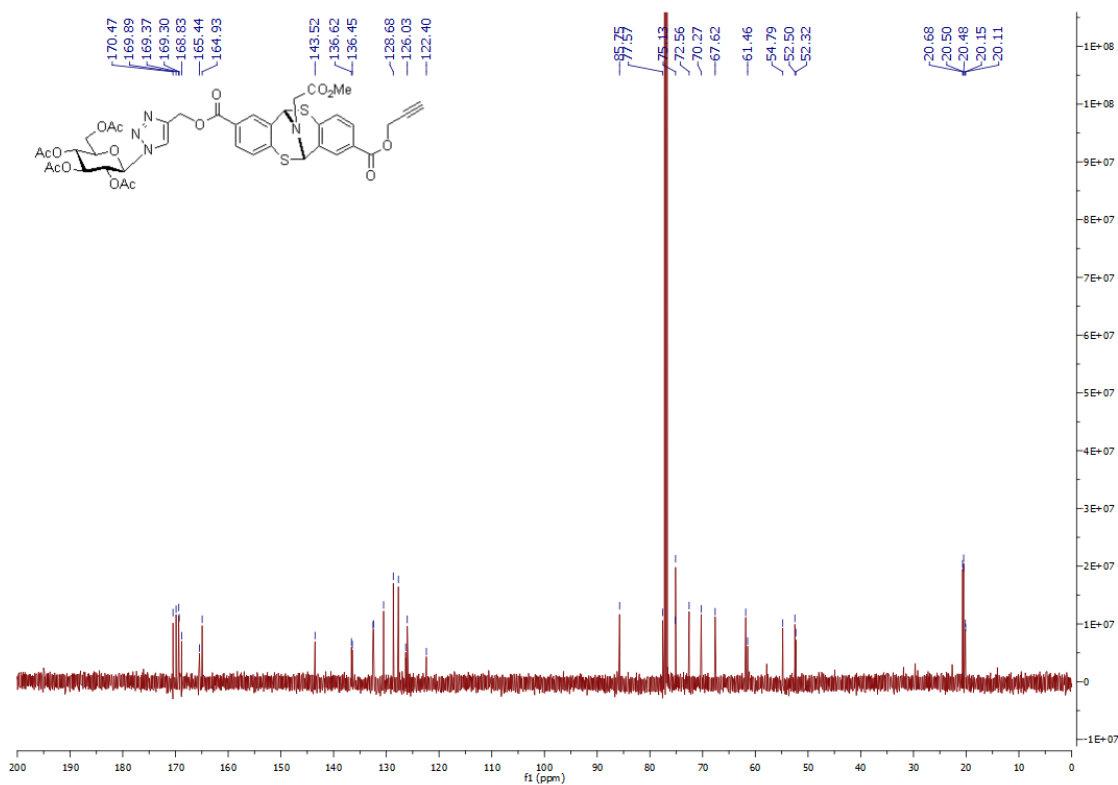

**<sup>13</sup>C NMR spectrum of **15d** in CDCl<sub>3</sub> (151 MHz).**

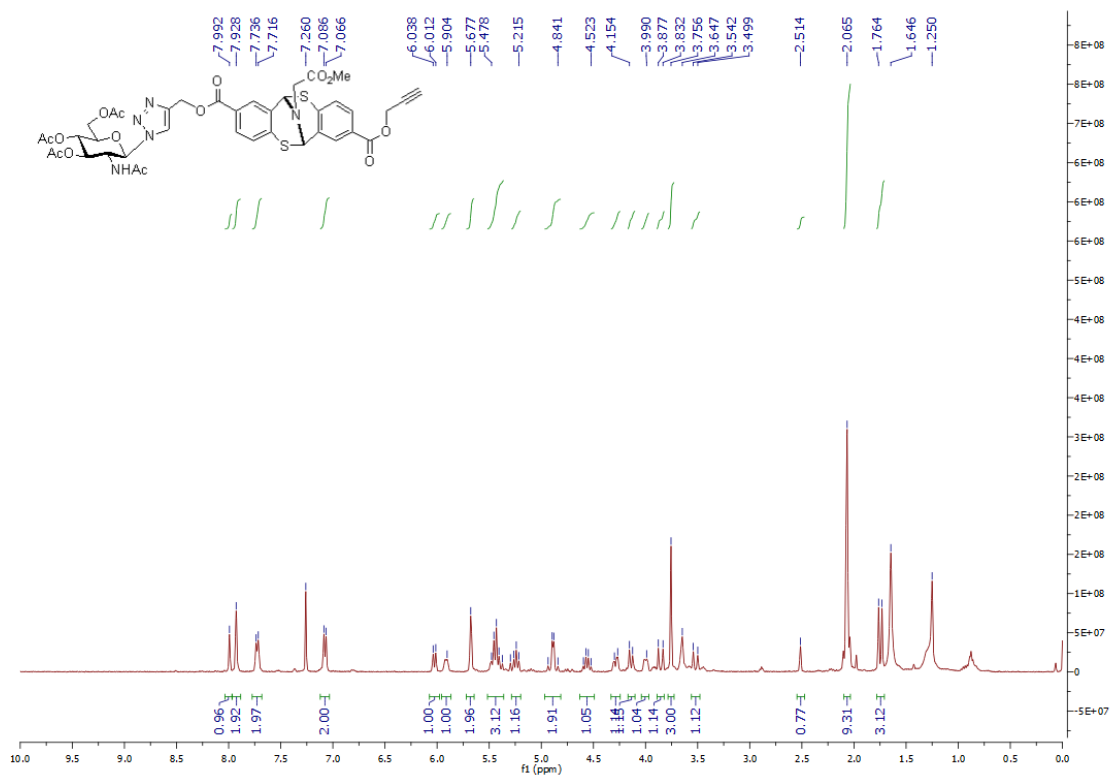

**<sup>1</sup>H NMR spectrum of 15e in CDCl<sub>3</sub> (400 MHz).**

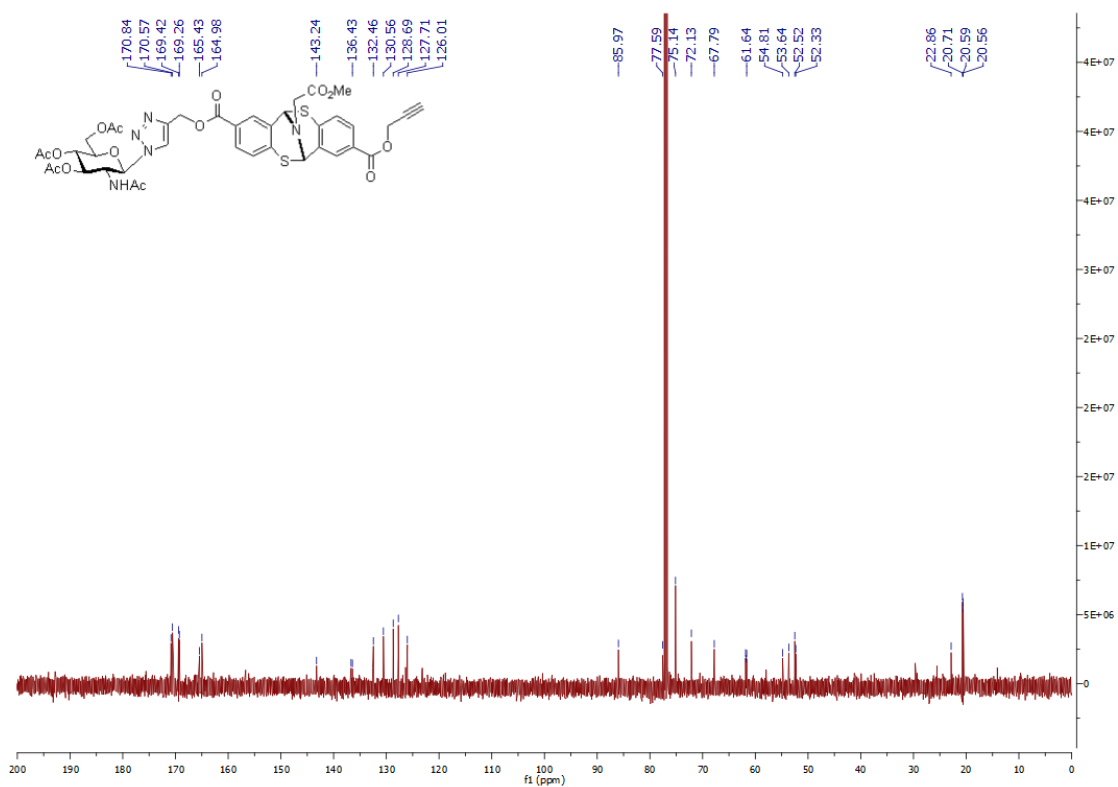

**<sup>13</sup>C NMR spectrum of 15e in CDCl<sub>3</sub> (151 MHz).**

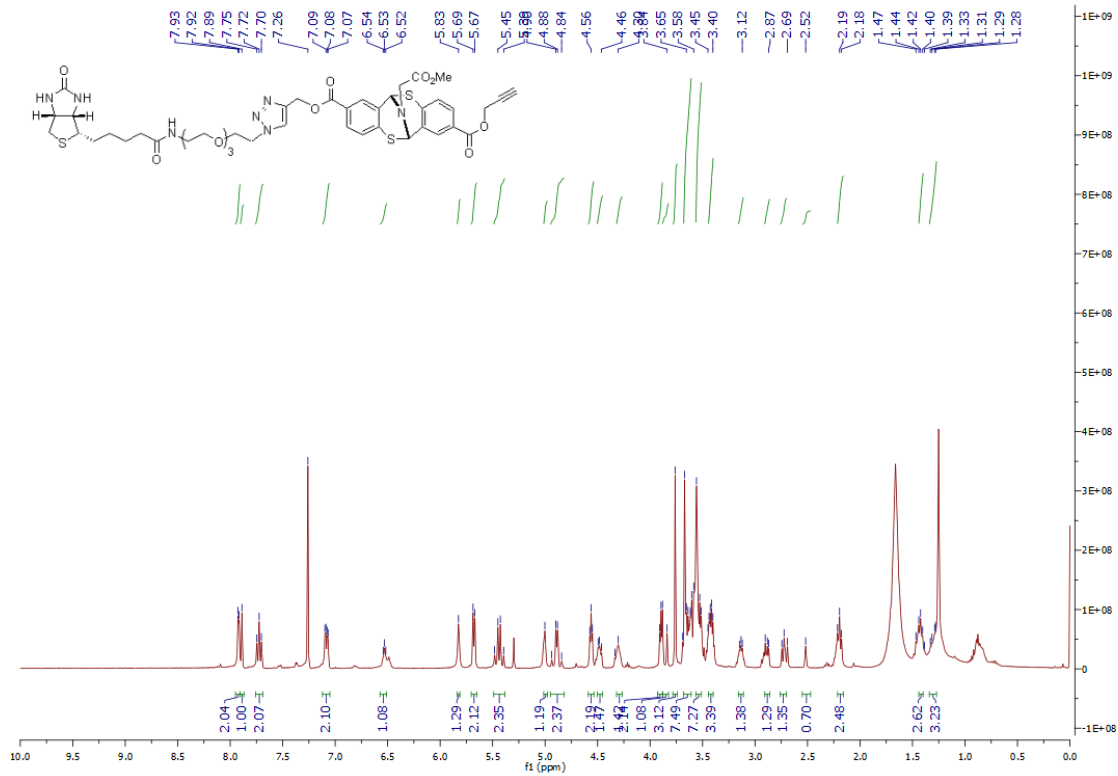

<sup>1</sup>H NMR spectrum of **15f** in CDCl<sub>3</sub> (400 MHz).

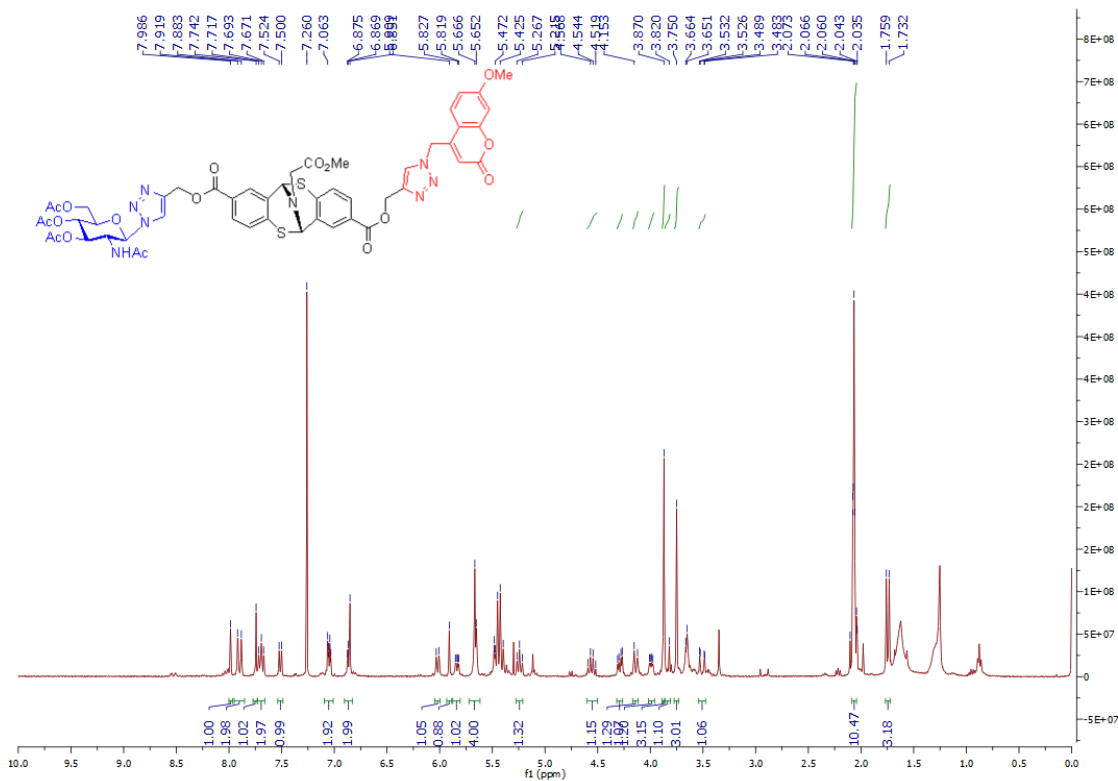

<sup>1</sup>H NMR spectrum of **16a** in CDCl<sub>3</sub> (400 MHz).

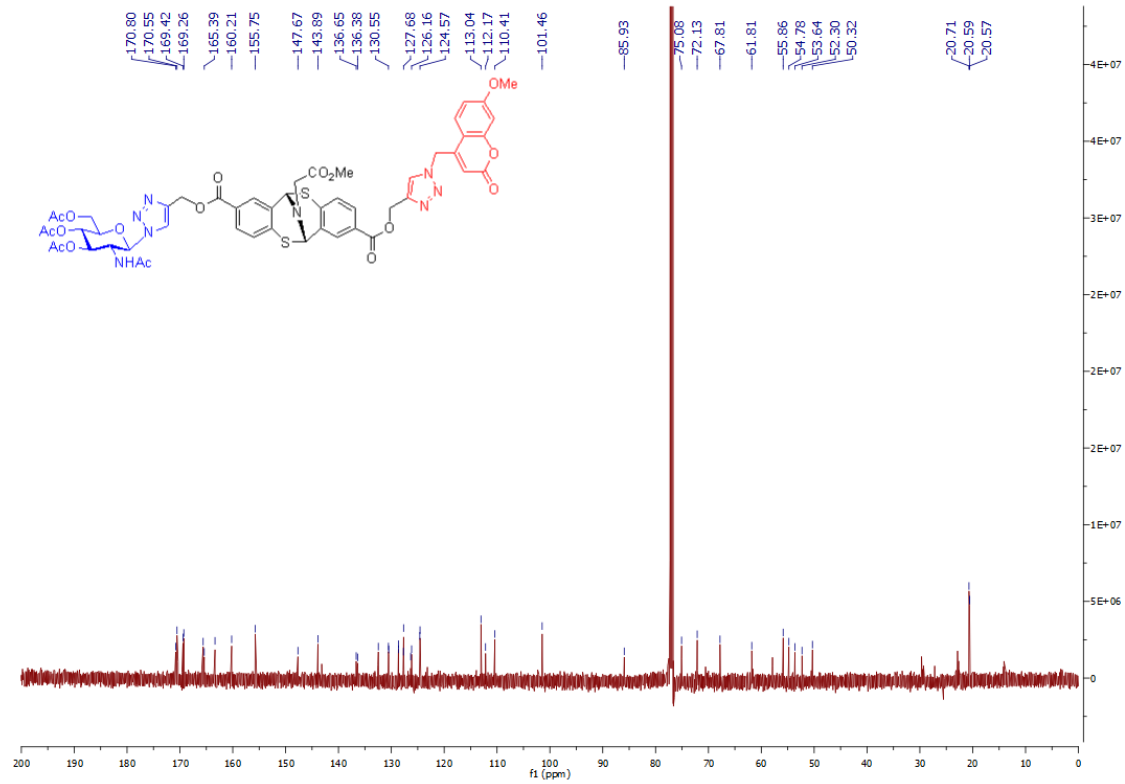

$^{13}\text{C}$  NMR spectrum of **16a** in  $\text{CDCl}_3$  (151 MHz).

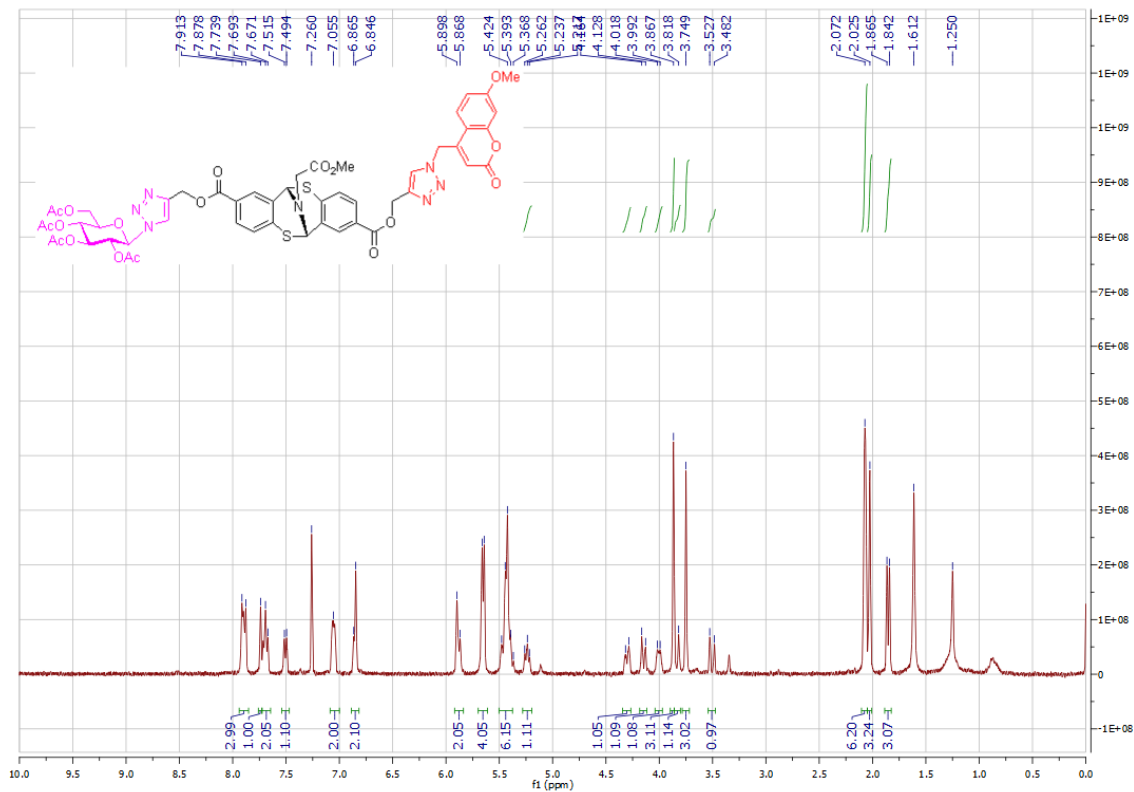

$^1\text{H}$  NMR spectrum of **16b** in  $\text{CDCl}_3$  (400 MHz).

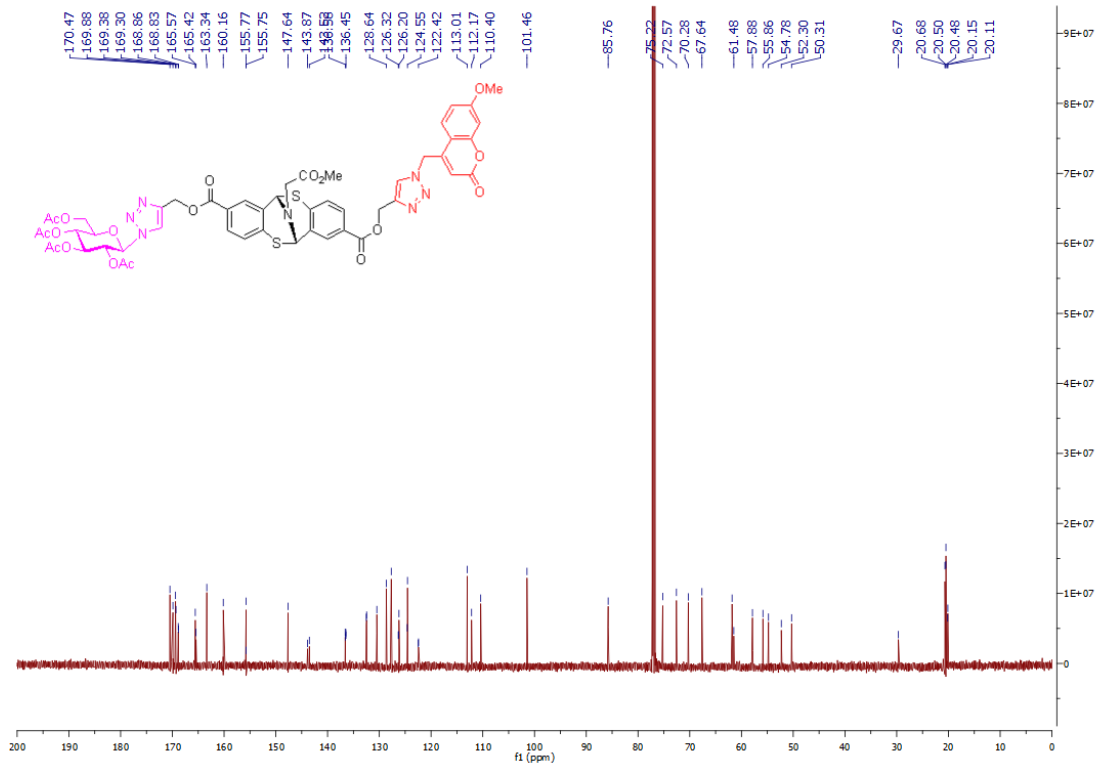

<sup>13</sup>C NMR spectrum of **16b** in CDCl<sub>3</sub> (151 MHz).

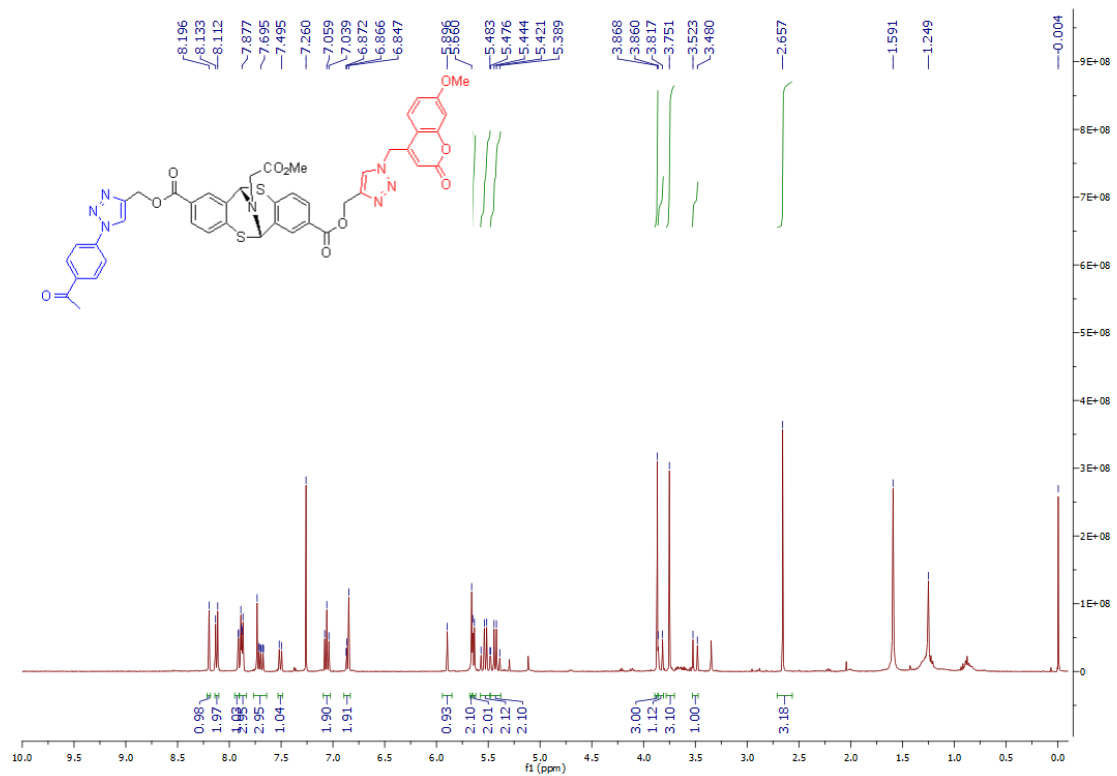

<sup>1</sup>H NMR spectrum of **16c** in CDCl<sub>3</sub> (400 MHz).

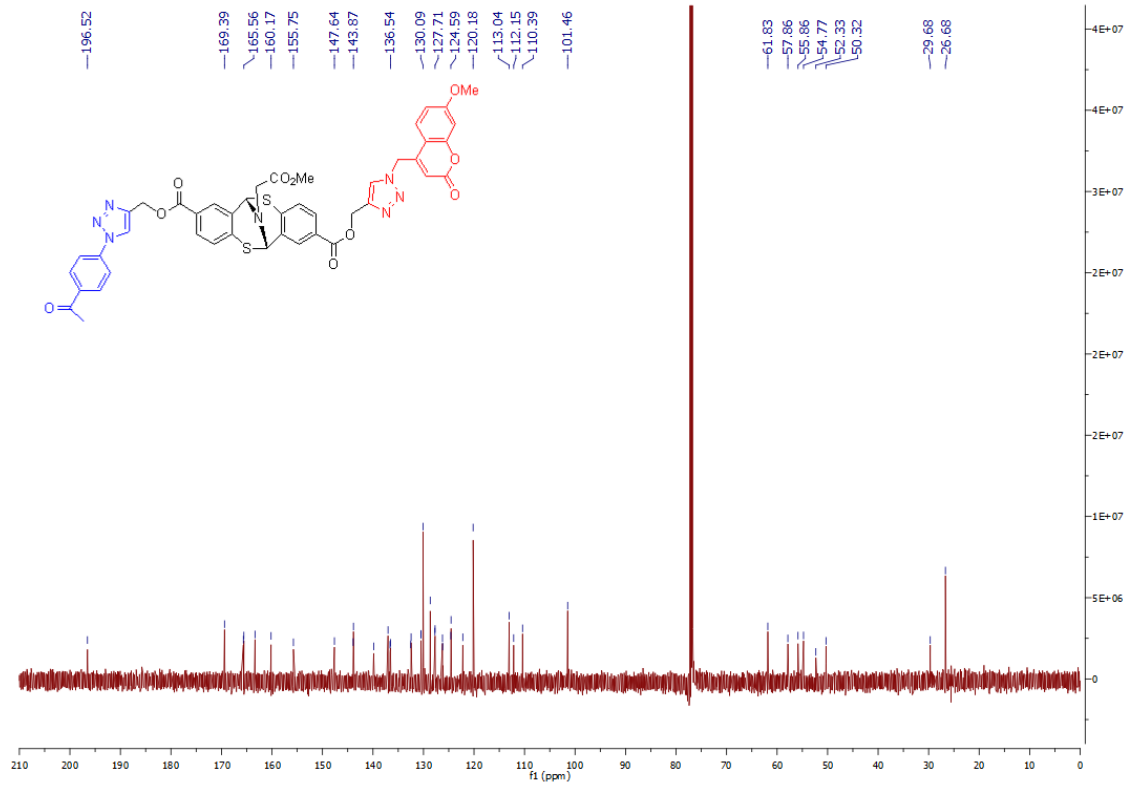

$^{13}\text{C}$  NMR spectrum of **16c** in  $\text{CDCl}_3$  (151 MHz).

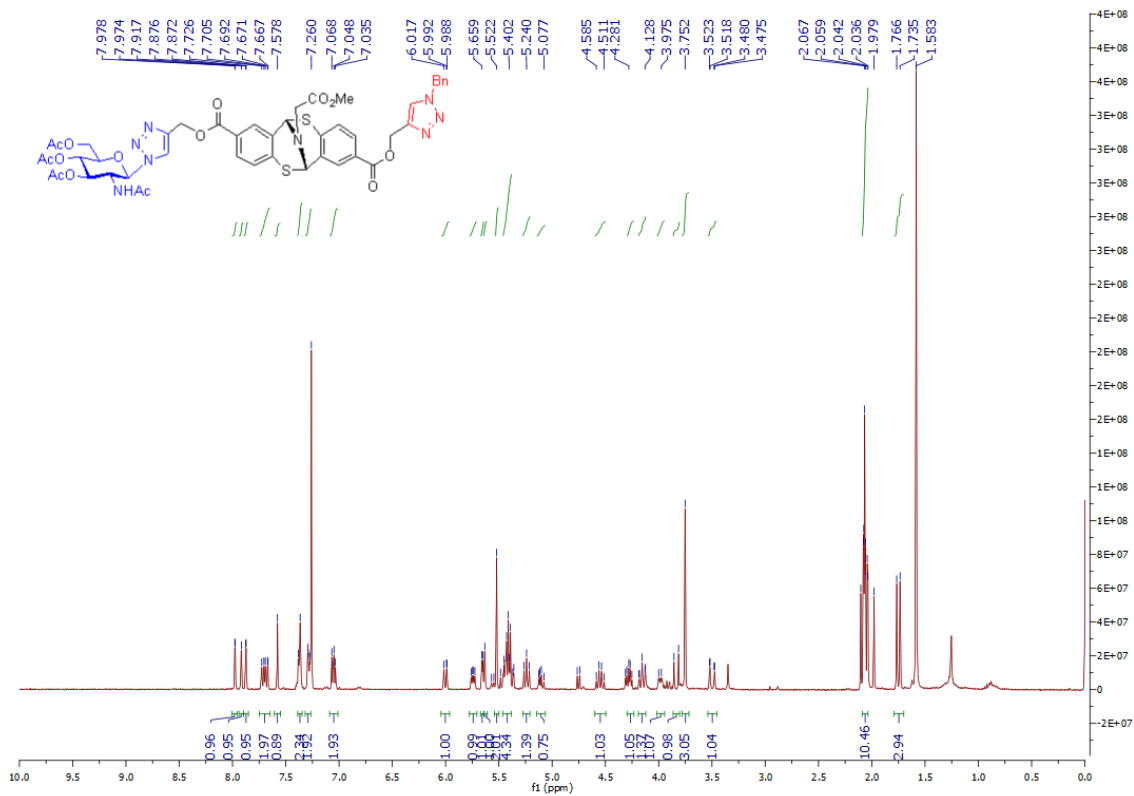

$^1\text{H}$  NMR spectrum of **16d** in  $\text{CDCl}_3$  (400 MHz).

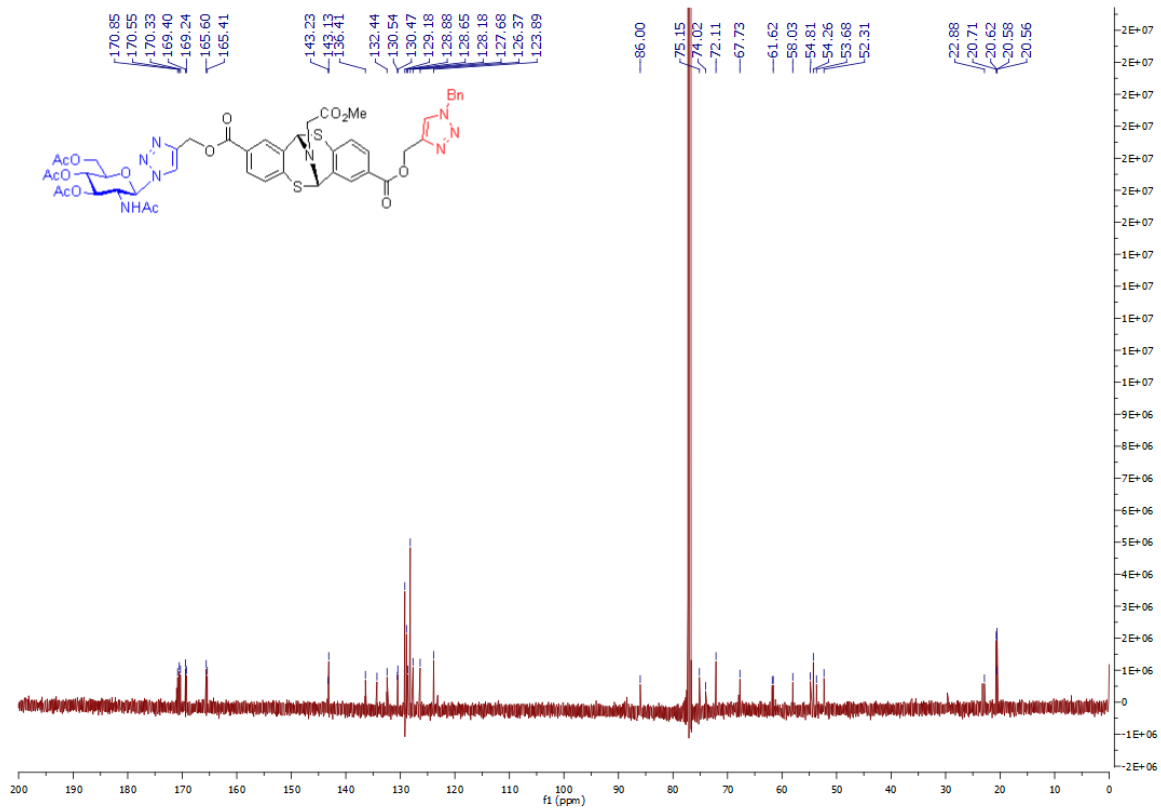

<sup>13</sup>C NMR spectrum of **16d** in CDCl<sub>3</sub> (151 MHz).
